# Supplementary material for: Copper-catalyzed carbonylative synthesis of pyrrolidine-containing amides from γ,δ-unsaturated aromatic oxime esters
Source: Royal Society of Chemistry journal article supplement (doi:10.1039/d0qo00999g), 2020-01-01

## Copper-Catalyzed Carbonylative Synthesis of Pyrrolidine-Containing Amides from $\gamma,\delta$ -Unsaturated Aromatic Oxime Esters

Youcan Zhang, Han-Jun Ai, Xiao-Feng Wu\*

Leibniz-Institut für Katalyse e.V. an der Universität Rostock, Albert-Einstein-Straße 29a, 18059 Rostock, Germany

Xiao-Feng.Wu@catalysis.de

### Contents

|                                                                                             |     |
|---------------------------------------------------------------------------------------------|-----|
| 1. General conditions.....                                                                  | S2  |
| 2. General procedures.....                                                                  | S2  |
| 2.1 General methods to synthesis of oxime esters .....                                      | S2  |
| 2.2 General procedure for carbonylation reactions .....                                     | S4  |
| 3. Analytical data.....                                                                     | S5  |
| 4. Reference.....                                                                           | S29 |
| 5. $^1\text{H}$ -, $^{13}\text{C}$ - and $^{19}\text{F}$ -NMR spectra copy of products..... | S30 |

## 1. General conditions

All solvents and commercially available reagents were purchased from Sigma-Aldrich, Abcr, Acros, TCI or Alfa Aesar and used without further purification. Anhydrous solvents were purchased from Sigma-Aldrich and used as received. NMR spectra were recorded on Bruker Avance 300 and Bruker ARX 400 spectrometers. Chemical shifts (ppm) are given relative to solvent: references for  $\text{CDCl}_3$  were 7.26 ppm ( $^1\text{H}$  NMR) and 77.00 ppm ( $^{13}\text{C}$  NMR). Multiplets were assigned as s (singlet), br.s (broad singlet), d (doublet), t (triplet), q (quartet), sept (septuplet), dd (doublet of doublet), dt (doublet of triplets), td (triplet of doublets) and m (multiplet). GC-yields were calculated using hexadecane as internal standard. All measurements were carried out at room temperature unless otherwise stated. Electron impact (EI) mass spectra were recorded on AMD 402 mass spectrometer (70 eV). High resolution mass spectra (HRMS) were recorded on Agilent 6210. The data are given as mass units per charge (m/z). Gas chromatography analysis was performed on an Agilent HP-7890A instrument with an FID detector and HP-5 capillary column (polydimethylsiloxane with 5% phenyl groups, 30 m, 0.32 mm i.d. 0.25  $\mu\text{m}$  film thickness) using argon as carrier gas. The products were isolated from the reaction mixture by column chromatography on silica gel 60, 0.063-0.2 mm, 70-230 mesh (Merck).

## 2. General procedures

### 2.1 General methods to synthesis of oxime esters.<sup>[1-5]</sup>

#### Method A

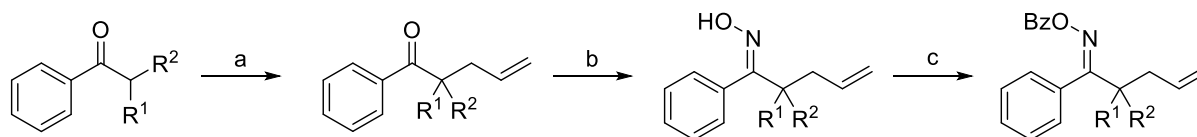

Reagents and conditions: (a) Allyl bromide, NaH, THF, 70 °C, overnight. (b)  $\text{NH}_2\text{OH}\cdot\text{HCl}$ , Pyridine, EtOH, 90 °C, overnight. (c)  $\text{PhCOCl}$ ,  $\text{Et}_3\text{N}$ , DCM, rt, overnight.

#### Step 1

Under argon atmosphere, to a 100 mL bottomed flask was charged with ketone (10 mmol, 1.0 equiv.), dry THF (0.5 M) was added and the solution was cooled to 0 °C, then NaH (1.2 or 2.5 equiv. 60% dispersion in oil) was added into the solution in portions. After stirring for 0.5 hour at 0 °C, allyl bromide (1.1 or 2.2 equiv.) was added dropwise, then the solution was heated to 70 °C and stirred for overnight. The reaction was quenched with  $\text{H}_2\text{O}$  at 0 °C, and the aqueous layer was extracted with ethyl acetate. The combined organic layers were washed with brine, dried ( $\text{Na}_2\text{SO}_4$ ). The solution was filtered, concentrated to give the corresponding crude unsaturated ketones, which were used in the next step without further purification.

#### Step 2

A mixture of unsaturated ketone (1.0 equiv.), hydroxylamine hydrochloride (1.2 equiv.) and pyridine (2.0 equiv.) were dissolved in EtOH (0.5 M). The mixture stirred at 90 °C for overnight. Then EtOH was removed by concentration, added  $\text{H}_2\text{O}$  and the aqueous layer was extracted with ethyl acetate. The combined organic layers were washed with saturated  $\text{NaHCO}_3$  solution, brine, dried ( $\text{Na}_2\text{SO}_4$ ), and concentrated to give the crude unsaturated ketone oximes, which were used in the next step without further purification.

#### Step 3

To a mixture of unsaturated ketone oxime (1.0 equiv.), triethylamine (2.0 equiv.) and DCM (0.5 M) in a 100 mL three-necked flask was added benzoyl chloride (1.2 equiv) at room temperature. After addition, the reaction was allowed to continue for overnight. The reaction was quenched with an aqueous solution of saturated  $\text{NaHCO}_3$ , and the aqueous layer was extracted with DCM. The combined organic layers were washed with brine, dried ( $\text{Na}_2\text{SO}_4$ ). Then the solution was filtered, concentrated to give the crude oxime esters. Purification by column chromatography on silica gel (pentane/ethyl acetate 10:1), gave the corresponding products.

#### Method B

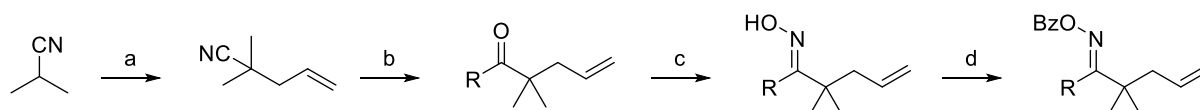

Reagents and conditions: (a)  $\text{Et}_2\text{NH}$ ,  $n\text{-BuLi}$ , THF; Allyl bromide, 0 °C to rt, overnight. (b) Aryl Grignard reagent, 0 °C to 60 °C, overnight. (c)  $\text{NH}_2\text{OH}\cdot\text{HCl}$ , Pyridine, EtOH, 90 °C, overnight. (d)  $\text{PhCOCl}$ ,  $\text{Et}_3\text{N}$ , DCM, rt, overnight.

#### Step 1

Under argon atmosphere, to a 100 mL three-necked flask was charged with  $\text{Et}_2\text{NH}$  (11 mmol, 1.1 equiv.), dry THF (0.5 M) was added and the solution was cooled to 0 °C, then  $n\text{-BuLi}$  (1.15 equiv. 2.5 M solution in hexanes) was added dropwise. After stirring for 1 hour at 0 °C, the isobutyronitrile (10 mmol, 1.0 equiv.) was added dropwise, and the solution was continued to stir for 1 hour at 0 °C. Next allyl bromide (11 mmol, 1.1 equiv. in 5 mL dry THF) was added dropwise at 0 °C, and the mixture was warmed to room temperature for overnight. The reaction was quenched with  $\text{H}_2\text{O}$  at 0 °C, and the aqueous layer was extracted with ethyl acetate. The combined organic layers were washed with brine, dried ( $\text{Na}_2\text{SO}_4$ ). The solution was filtered, concentrated purification by column chromatography on silica gel (pentane/ethyl acetate 50:1) to give the corresponding product 2,2-dimethylpent-4-enenitrile.

#### Step 2

To a 100 mL three-necked flask was charged with 2,2-dimethylpent-4-enenitrile (1.0 equiv.), the flask was evacuated and backfilled with nitrogen (3 times). Dry THF (0.5 M) was added, and the solution was cooled to 0 °C, then aryl Grignard reagent (2.0 equiv.) was added dropwise. The mixture was heated to 60 °C and stirred for overnight. The reaction mixture was cooled to 0 °C and quenched with a 3 N hydrochloride solution, then warmed to room temperature and stirred for 3 hours. The aqueous layer was extracted with ethyl acetate. The combined organic layers were washed with brine, dried ( $\text{Na}_2\text{SO}_4$ ). Then the solution was filtered, concentrated to give the crude unsaturated ketones, which were used in the next step without further purification. (Note: The main procedure follows the Method A, step 2 and Method A, step 3.)

#### Method C

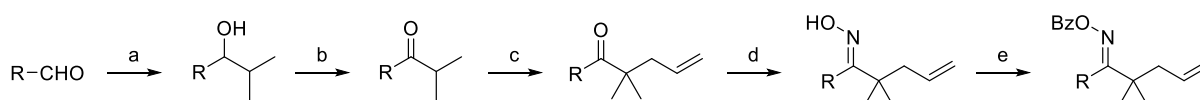

Reagents and conditions: (a) Isopropyl or ethyl Grignard reagent, THF, 0 °C to rt, 30 h. (b) PCC, DCM, rt, 3 h. (c) Allyl bromide,  $\text{NaH}$ , THF, 70 °C, overnight. (d)  $\text{NH}_2\text{OH}\cdot\text{HCl}$ , Pyridine, EtOH, 90 °C, overnight. (e)  $\text{PhCOCl}$ ,  $\text{Et}_3\text{N}$ , DCM, rt, overnight.

#### Step 1

A 100 mL round bottomed flask charged with a solution of the aldehyde (10 mmol, 1.0 equiv.) in dry THF (0.5 M) was kept at 0 °C with stirring. The isopropyl or ethyl Grignard reagent (1.5 equiv.) was slowly added to the

solution and the resulting suspension was stirred at rt for 30 hours, then the reaction was quenched with saturated NH<sub>4</sub>Cl solution at 0 °C, and the aqueous layer was extracted with ethyl acetate. The combined organic layers were washed with H<sub>2</sub>O, brine, and dried over Na<sub>2</sub>SO<sub>4</sub>, next filtered and concentrated in vacuo. The crude product alcohol was directly used in the next step without further purification.

## Step 2

To a solution of the alcohol in DCM was stirred at 0°C added pyridinium chlorochromate (PCC, 2.0 equiv.) slowly. The resulting mixture was allowed to warm to room temperature and stirred for 3 hours. The reaction was diluted with H<sub>2</sub>O and extracted with ethyl acetate. The combined organic layers were washed with brine, dried over Na<sub>2</sub>SO<sub>4</sub>, filtered, and concentrated in vacuo. The crude ketone was purification by column chromatography on silica gel (pentane/ethyl acetate 50:1) to give the corresponding product ketone. (Note: The main procedure follows the Method A, step 1-3)

## 2.2 General procedure for carbonylation reactions

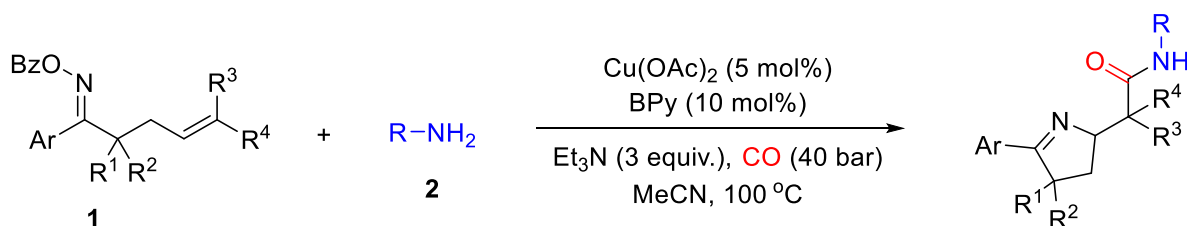

To each screw-cap vial (4 mL) equipped with a septum, a small cannula, and a stirring bar was added oxime ester **1** (0.3 mmol), 2,2'-bipyridine (3.1 mg, 10 mol%) and Cu(OAc)<sub>2</sub> (1.8 mg, 5 mol%), then added MeCN (2 mL), a mine **2** (0.2 mmol) and Et<sub>3</sub>N (0.6 mmol). These vials were placed on an alloy plate and transferred into a 300 mL autoclave of the 4560 series from Parr instruments. After flushing the autoclave three times with CO, a pressure of 40 bar CO was set, and the reaction was performed for 20 hours at 100 °C (aluminum block). Afterward, the autoclave was cooled to room temperature and the pressure was released carefully. The organic phase was removed under reduced pressure and the crude products were purified by column chromatography on silica gel (eluent: pentane/ethyl acetate = 5:1 to 0:1).

1 mmol scale: To a screw-cap vial (12 mL) equipped with a septum, a small cannula, and a stirring bar was added 2,2-dimethyl-1-phenylpent-4-en-1-one *O*-benzoyl oxime **1a** (1.25 mmol), 2,2'-bipyridine (6.2 mg, 4 mol%) and Cu(OAc)<sub>2</sub> (3.6 mg, 2 mol%), then added MeCN (7 mL), aniline **2a** (1.0 mmol) and Et<sub>3</sub>N (3.0 mmol). These vials were placed on an alloy plate and transferred into a 300 mL autoclave of the 4560 series from Parr instruments. After flushing the autoclave three times with CO, a pressure of 40 bar CO was set, and the reaction was performed for 20 hours at 100 °C (aluminum block). Afterward, the autoclave was cooled to room temperature and the pressure was released carefully. The organic phase was removed under reduced pressure and the crude products were purified by column chromatography on silica gel (eluent: pentane/ethyl acetate = 5:1 to 2:1) to give the product **3a** in 85% yield (260.4 mg).

### 3. Analytical data

2-(4,4-Dimethyl-5-phenyl-3,4-dihydro-2H-pyrrol-2-yl)-N-phenylacetamide (**3a**)

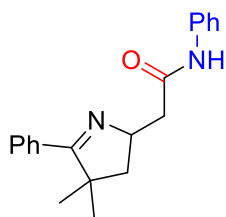

55.2 mg, yellow oil, yield: 90%. Eluent: pentane/ethyl acetate = 5/1 to 2/1.

**<sup>1</sup>H NMR** (300 MHz, CDCl<sub>3</sub>) δ 10.27 (br.s, 1H), 7.83 – 7.77 (m, 2H), 7.62 – 7.55 (m, 2H), 7.49 – 7.40 (m, 3H), 7.33 – 7.28 (m, 2H), 7.10 – 7.03 (m, 1H), 4.42 – 4.29 (m, 1H), 2.71 (dd, *J* = 15.6, 4.0 Hz, 1H), 2.61 (dd, *J* = 15.6, 10.3 Hz, 1H), 2.20 (dd, *J* = 12.6, 6.6 Hz, 1H), 1.61 (dd, *J* = 12.6, 9.3 Hz, 1H), 1.41 (s, 3H), 1.40 (s, 3H).

**<sup>13</sup>C NMR** (75 MHz, CDCl<sub>3</sub>) δ 180.1, 170.1, 138.6, 133.8, 130.1, 128.8, 128.4, 127.9, 123.6, 119.7, 64.1, 50.0, 48.5, 44.2, 27.0, 25.5.

**HR-MS** (ESI-TOF) calcd. for C<sub>20</sub>H<sub>22</sub>N<sub>2</sub>O [M+H]<sup>+</sup>: 307.1810; found: 307.1813; [M+Na]<sup>+</sup>: 329.1624; found: 329.1632.

2-(4,4-Dimethyl-5-phenyl-3,4-dihydro-2H-pyrrol-2-yl)-N-(*o*-tolyl)acetamide (**3b**)

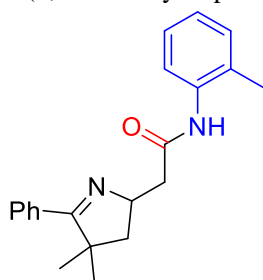

59.6 mg, yellow oil, yield: 93%. Eluent: pentane/ethyl acetate = 5/1 to 2/1.

**<sup>1</sup>H NMR** (400 MHz, CDCl<sub>3</sub>) δ 10.05 (br.s, 1H), 8.08 (dd, *J* = 8.3, 1.3 Hz, 1H), 7.84 – 7.74 (m, 2H), 7.49 – 7.41 (m, 3H), 7.23 (td, *J* = 7.8, 1.6 Hz, 1H), 7.17 (dd, *J* = 7.1, 1.3 Hz, 1H), 7.05 (td, *J* = 7.5, 1.3 Hz, 1H), 4.51 – 4.33 (m, 1H), 2.80 (dd, *J* = 15.5, 3.5 Hz, 1H), 2.69 (dd, *J* = 15.5, 10.7 Hz, 1H), 2.28 (s, 3H), 2.24 (dd, *J* = 12.6, 6.6 Hz, 1H), 1.67 (dd, *J* = 12.6, 9.3 Hz, 1H), 1.45 (s, 3H), 1.43 (s, 3H).

**<sup>13</sup>C NMR** (101 MHz, CDCl<sub>3</sub>) δ 180.5, 170.2, 136.7, 133.7, 130.2, 130.0, 128.4, 128.2, 127.9, 126.4, 124.1, 122.3, 64.3, 50.0, 48.3, 44.2, 26.9, 25.6, 18.3.

**HR-MS** (ESI-TOF) calcd. for C<sub>21</sub>H<sub>24</sub>N<sub>2</sub>O [M+H]<sup>+</sup>: 321.1967; found: 321.1965; [M+Na]<sup>+</sup>: 343.1781; found: 343.1785.

2-(4,4-Dimethyl-5-phenyl-3,4-dihydro-2H-pyrrol-2-yl)-N-(2-methoxyphenyl)acetamide (**3c**)

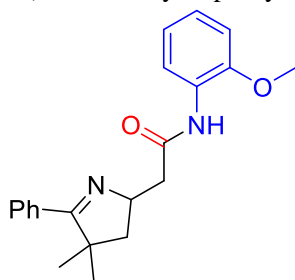

63.2 mg, yellow oil, yield: 94%. Eluent: pentane/ethyl acetate = 5/1 to 2/1.

**<sup>1</sup>H NMR** (300 MHz, CDCl<sub>3</sub>) δ 10.09 (br.s, 1H), 8.48 (dd, *J* = 7.8, 1.9 Hz, 1H), 7.94 – 7.85 (m, 2H), 7.47 – 7.37 (m, 3H), 7.01 (td, *J* = 7.7, 1.9 Hz, 1H), 6.95 (td, *J* = 7.7, 1.7 Hz, 1H), 6.85 (dd, *J* = 7.8, 1.7 Hz, 1H), 4.43 – 4.31

(m, 1H), 3.75 (s, 3H), 2.77 (dd,  $J = 15.0, 4.7$  Hz, 1H), 2.69 (dd,  $J = 15.0, 9.3$  Hz, 1H), 2.20 (dd,  $J = 12.5, 6.7$  Hz, 1H), 1.62 (dd,  $J = 12.5, 9.3$  Hz, 1H), 1.41 (s, 6H).

$^{13}\text{C}$  NMR (75 MHz,  $\text{CDCl}_3$ )  $\delta$  179.6, 170.0, 148.2, 134.0, 129.9, 128.3, 128.1, 123.2, 120.8, 120.0, 109.8, 64.2, 55.4, 50.0, 48.5, 44.8, 27.1, 25.6.

**HR-MS** (ESI-TOF) calcd. for  $\text{C}_{21}\text{H}_{24}\text{N}_2\text{O}_2$   $[\text{M}+\text{H}]^+$ : 337.1916; found: 337.1914;  $[\text{M}+\text{Na}]^+$ : 359.1730; found: 359.1734.

2-(4,4-Dimethyl-5-phenyl-3,4-dihydro-2H-pyrrol-2-yl)-N-(2-fluorophenyl)acetamide (**3d**)

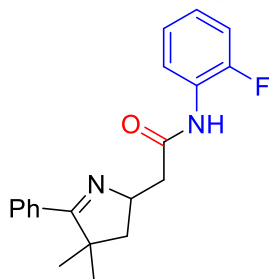

51.9 mg, yellow oil, yield: 80%. Eluent: pentane/ethyl acetate = 5/1 to 2/1.

$^1\text{H}$  NMR (300 MHz,  $\text{CDCl}_3$ )  $\delta$  10.59 (br.s, 1H), 8.43 (td,  $J = 8.1, 1.8$  Hz, 1H), 7.95 – 7.83 (m, 2H), 7.47 – 7.39 (m, 3H), 7.14 – 6.99 (m, 3H), 4.41 – 4.30 (m, 1H), 2.76 (dd,  $J = 15.6, 3.7$  Hz, 1H), 2.63 (dd,  $J = 15.6, 10.7$  Hz, 1H),  $\delta$  2.21 (dd,  $J = 12.6, 6.6$  Hz, 1H), 1.61 (dd,  $J = 12.6, 9.2$  Hz, 1H), 1.44 (s, 3H), 1.42 (s, 3H).

$^{13}\text{C}$  NMR (75 MHz,  $\text{CDCl}_3$ )  $\delta$  179.7, 170.3, 152.6 (d,  $J = 244.0$  Hz), 133.4, 130.2, 128.3, 128.1 (d,  $J = 1.7$  Hz), 127.1 (d,  $J = 10.5$  Hz), 124.3 (d,  $J = 3.6$  Hz), 123.6 (d,  $J = 7.5$  Hz), 121.7 (d,  $J = 1.6$  Hz), 114.7 (d,  $J = 19.2$  Hz), 63.8, 50.0, 48.6, 44.4, 27.2, 25.6.

$^{19}\text{F}$  NMR (282 MHz,  $\text{CDCl}_3$ )  $\delta$  -129.2.

**HR-MS** (ESI-TOF) calcd. for  $\text{C}_{20}\text{H}_{21}\text{FN}_2\text{O}$   $[\text{M}+\text{H}]^+$ : 325.1716; found: 325.1716.

2-(4,4-Dimethyl-5-phenyl-3,4-dihydro-2H-pyrrol-2-yl)-N-(2-(trifluoromethyl)phenyl)acetamide (**3e**)

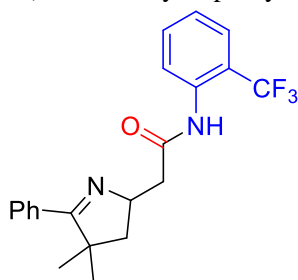

48.7 mg, yellow oil, yield: 65%. Eluent: pentane/ethyl acetate = 5/1 to 2/1.

$^1\text{H}$  NMR (300 MHz,  $\text{CDCl}_3$ )  $\delta$  10.14 (br.s, 1H), 8.08 (d,  $J = 8.3$  Hz, 1H), 7.82 – 7.72 (m, 2H), 7.63 – 7.50 (m, 2H), 7.44 – 7.37 (m, 3H), 7.25 – 7.18 (m, 1H), 4.43 – 4.32 (m, 1H), 2.74 (dd,  $J = 15.7, 4.3$  Hz, 1H), 2.66 (dd,  $J = 15.7, 10.2$  Hz, 1H), 2.21 (dd,  $J = 12.5, 6.6$  Hz, 1H), 1.60 (dd,  $J = 12.5, 9.3$  Hz, 1H), 1.41 (s, 6H).

$^{13}\text{C}$  NMR (75 MHz,  $\text{CDCl}_3$ )  $\delta$  180.1, 170.7, 135.5, 133.7, 132.4, 130.0, 128.1, 128.0, 126.2, 123.6 (q,  $J = 5.5$  Hz), 124.5, 123.9 (q,  $J = 273.2$  Hz), 63.9, 50.1, 48.5, 44.2, 27.1, 25.6.

$^{19}\text{F}$  NMR (282 MHz,  $\text{CDCl}_3$ )  $\delta$  -60.9.

**HR-MS** (ESI-TOF) calcd. for  $\text{C}_{21}\text{H}_{21}\text{F}_3\text{N}_2\text{O}$   $[\text{M}+\text{H}]^+$ : 375.1684; found: 375.1684;  $[\text{M}+\text{Na}]^+$ : 397.1498; found: 397.1503.

2-(4,4-Dimethyl-5-phenyl-3,4-dihydro-2H-pyrrol-2-yl)-N-(3-methoxyphenyl)acetamide (**3f**)

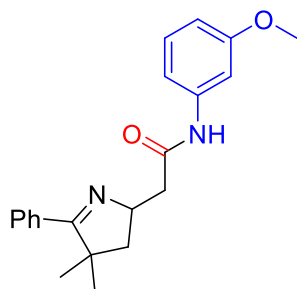

61.2 mg, yellow oil, yield: 91%. Eluent: pentane/ethyl acetate = 5/1 to 2/1.

**<sup>1</sup>H NMR** (300 MHz, CDCl<sub>3</sub>) δ 10.27 (br.s, 1H), 7.85 – 7.74 (m, 2H), 7.51 – 7.40 (m, 3H), 7.38 (t, *J* = 2.2 Hz, 1H), 7.19 (t, *J* = 8.1 Hz, 1H), 7.02 (ddd, *J* = 8.0, 2.0, 0.9 Hz, 1H), 6.63 (ddd, *J* = 8.2, 2.5, 1.0 Hz, 1H), 4.41 – 4.29 (m, 1H), 3.79 (s, 3H), 2.71 (dd, *J* = 15.5, 3.8 Hz, 1H), 2.59 (dd, *J* = 15.5, 10.4 Hz, 1H), 2.20 (dd, *J* = 12.6, 6.6 Hz, 1H), 1.60 (dd, *J* = 12.6, 9.3 Hz, 1H), 1.41 (s, 3H), 1.41 (s, 3H).

**<sup>13</sup>C NMR** (75 MHz, CDCl<sub>3</sub>) δ 180.1, 170.1, 160.1, 139.8, 133.8, 130.2, 129.5, 128.4, 127.9, 111.9, 109.6, 105.3, 64.1, 55.2, 50.0, 48.5, 44.2, 27.1, 25.5.

**HR-MS** (ESI-TOF) calcd. for C<sub>21</sub>H<sub>24</sub>N<sub>2</sub>O<sub>2</sub> [M+H]<sup>+</sup>: 337.1916; found: 337.1916.

2-(4,4-Dimethyl-5-phenyl-3,4-dihydro-2H-pyrrol-2-yl)-N-(3-phenoxyphenyl)acetamide (**3g**)

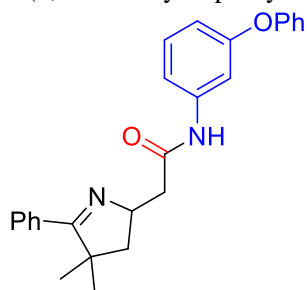

72.5 mg, yellow oil, yield: 91%. Eluent: pentane/ethyl acetate = 5/1 to 2/1.

**<sup>1</sup>H NMR** (300 MHz, CDCl<sub>3</sub>) δ 10.36 (br.s, 1H), 7.80 – 7.71 (m, 2H), 7.47 – 7.36 (m, 4H), 7.35 – 7.28 (m, 3H), 7.24 (t, *J* = 8.0 Hz, 1H), 7.12 – 7.06 (m, 1H), 7.06 – 7.00 (m, 2H), 6.72 (ddd, *J* = 7.9, 2.4, 1.3 Hz, 1H), 4.40 – 4.27 (m, 1H), 2.69 (dd, *J* = 15.6, 4.0 Hz, 1H), 2.58 (dd, *J* = 15.6, 10.3 Hz, 1H), 2.19 (dd, *J* = 12.6, 6.6 Hz, 1H), 1.59 (dd, *J* = 12.6, 9.3 Hz, 1H), 1.40 (s, 6H).

**<sup>13</sup>C NMR** (75 MHz, CDCl<sub>3</sub>) δ 180.1, 170.1, 157.6, 157.0, 140.0, 133.7, 130.1, 129.8, 129.6, 128.3, 127.8, 123.2, 118.9, 114.5, 113.9, 110.4, 64.0, 50.0, 48.4, 44.1, 27.0, 25.5.

**HR-MS** (ESI-TOF) calcd. for C<sub>26</sub>H<sub>26</sub>N<sub>2</sub>O<sub>2</sub> [M+H]<sup>+</sup>: 399.2072; found: 399.2075; [M+Na]<sup>+</sup>: 421.1886; found: 421.1889.

2-(4,4-Dimethyl-5-phenyl-3,4-dihydro-2H-pyrrol-2-yl)-N-(3-(trifluoromethyl)phenyl)acetamide (**3h**)

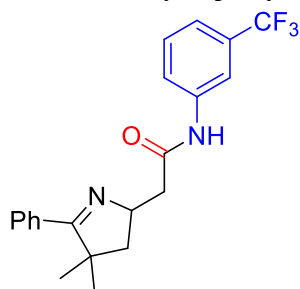

67.4 mg, yellow oil, yield: 90%. Eluent: pentane/ethyl acetate = 5/1 to 2/1.

**<sup>1</sup>H NMR** (400 MHz, CDCl<sub>3</sub>) δ 10.63 (br.s, 1H), 7.92 (s, 1H), 7.80 – 7.73 (m, 3H), 7.48 – 7.38 (m, 4H), 7.34 – 7.28 (m, 1H), 4.43 – 4.34 (m, 1H), 2.77 (dd, *J* = 15.4, 3.6 Hz, 1H), 2.62 (dd, *J* = 15.4, 10.3 Hz, 1H), 2.22 (dd, *J* = 12.6, 6.6 Hz, 1H), 1.67 (dd, *J* = 12.6, 9.3 Hz, 1H), 1.42 (s, 3H), 1.40 (s, 3H).

**<sup>13</sup>C NMR** (101 MHz, CDCl<sub>3</sub>) δ 180.9, 170.3, 139.1, 133.5, 131.2 (q, *J* = 32.2 Hz), 130.3, 129.3, 128.4, 127.9, 123.9 (q, *J* = 272.3 Hz), 122.6, 120.1 (q, *J* = 3.9 Hz), 116.3 (q, *J* = 4.0 Hz), 64.0, 50.2, 48.1, 43.9, 27.0, 25.6.

**<sup>19</sup>F NMR** (376 MHz, CDCl<sub>3</sub>) δ -62.7.

**HR-MS** (ESI-TOF) calcd. for C<sub>21</sub>H<sub>21</sub>F<sub>3</sub>N<sub>2</sub>O [M+H]<sup>+</sup>: 375.1684; found: 375.1687; [M+Na]<sup>+</sup>: 397.1498; found: 397.1502.

2-(4,4-Dimethyl-5-phenyl-3,4-dihydro-2*H*-pyrrol-2-yl)-*N*-(3-nitrophenyl)acetamide (**3i**)

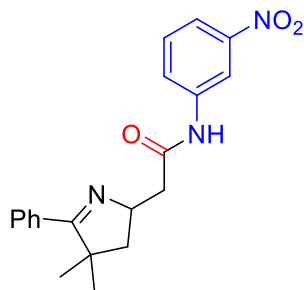

52.7 mg, yellow oil, yield: 75%. Eluent: pentane/ethyl acetate = 5/1 to 2/1.

**<sup>1</sup>H NMR** (300 MHz, CDCl<sub>3</sub>) δ 10.92 (br.s, 1H), 8.46 (t, *J* = 2.2 Hz, 1H), 7.96 – 7.86 (m, 2H), 7.84 – 7.73 (m, 2H), 7.52 – 7.40 (m, 4H), 4.42 – 4.29 (m, 1H), 2.75 (dd, *J* = 15.8, 3.4 Hz, 1H), 2.59 (dd, *J* = 15.8, 11.0 Hz, 1H), 2.23 (dd, *J* = 12.6, 6.6 Hz, 1H), 1.61 (dd, *J* = 12.6, 9.3 Hz, 1H), 1.42 (s, 6H).

**<sup>13</sup>C NMR** (75 MHz, CDCl<sub>3</sub>) δ 180.6, 170.6, 148.5, 139.7, 133.6, 130.4, 129.6, 128.5, 127.8, 125.3, 118.2, 114.4, 63.8, 50.1, 48.5, 44.0, 27.0, 25.5.

**HR-MS** (ESI-TOF) calcd. for C<sub>20</sub>H<sub>21</sub>N<sub>3</sub>O<sub>3</sub> [M+H]<sup>+</sup>: 352.1661; found: 352.1664; [M+Na]<sup>+</sup>: 374.1475; found: 374.1483.

2-(4,4-Dimethyl-5-phenyl-3,4-dihydro-2*H*-pyrrol-2-yl)-*N*-(4-methoxyphenyl)acetamide (**3j**)

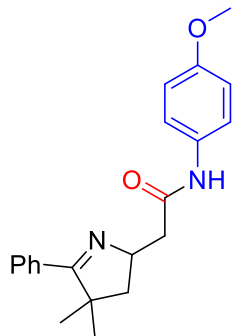

57.2 mg, yellow oil, yield: 85%. Eluent: pentane/ethyl acetate = 5/1 to 2/1.

**<sup>1</sup>H NMR** (300 MHz, CDCl<sub>3</sub>) δ 10.04 (br.s, 1H), 7.81 – 7.74 (m, 2H), 7.52 – 7.46 (m, 2H), 7.46 – 7.39 (m, 3H), 6.87 – 6.81 (m, 2H), 4.44 – 4.30 (m, 1H), 3.77 (s, 3H), 2.72 (dd, *J* = 15.4, 4.1 Hz, 1H), 2.61 (dd, *J* = 15.4, 9.8 Hz, 1H), 2.19 (dd, *J* = 12.6, 6.6 Hz, 1H), 1.65 (dd, *J* = 12.6, 9.2 Hz, 1H), 1.40 (s, 3H), 1.39 (s, 3H).

**<sup>13</sup>C NMR** (75 MHz, CDCl<sub>3</sub>) δ 180.3, 169.7, 155.9, 133.7, 131.8, 130.1, 128.3, 127.8, 121.3, 114.0, 64.2, 55.4, 50.1, 48.1, 43.8, 27.0, 25.6.

**HR-MS** (ESI-TOF) calcd. for C<sub>21</sub>H<sub>24</sub>N<sub>2</sub>O<sub>2</sub> [M+H]<sup>+</sup>: 337.1916; found: 337.1921.



2-(4,4-Dimethyl-5-phenyl-3,4-dihydro-2H-pyrrol-2-yl)-N-(4-(methylthio)phenyl)acetamide (**3k**)

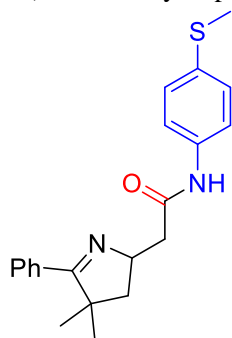

62.0 mg, yellow oil, yield: 88%. Eluent: pentane/ethyl acetate = 5/1 to 2/1.

**<sup>1</sup>H NMR** (300 MHz, CDCl<sub>3</sub>) δ 10.27 (br.s, 1H), 7.80 – 7.72 (m, 2H), 7.55 – 7.48 (m, 2H), 7.48 – 7.39 (m, 3H), 7.25 – 7.19 (m, 2H), 4.41 – 4.29 (m, 1H), 2.71 (dd, *J* = 15.5, 3.8 Hz, 1H), 2.59 (dd, *J* = 15.5, 10.3 Hz, 1H), 2.45 (s, 3H), 2.19 (dd, *J* = 12.6, 6.6 Hz, 1H), 1.62 (dd, *J* = 12.6, 9.3 Hz, 1H), 1.41 (s, 3H), 1.39 (s, 3H).

**<sup>13</sup>C NMR** (75 MHz, CDCl<sub>3</sub>) δ 180.3, 170.0, 136.4, 133.7, 132.5, 130.1, 128.4, 128.1, 127.8, 120.3, 64.1, 50.1, 48.3, 44.0, 27.0, 25.6, 16.9.

**HR-MS** (ESI-TOF) calcd. for C<sub>21</sub>H<sub>24</sub>N<sub>2</sub>OS [M+H]<sup>+</sup>: 353.1687; found: 353.1688; [M+Na]<sup>+</sup>: 375.1501; found: 375.1508.

2-(4,4-Dimethyl-5-phenyl-3,4-dihydro-2H-pyrrol-2-yl)-N-(4-phenoxyphenyl)acetamide (**3l**)

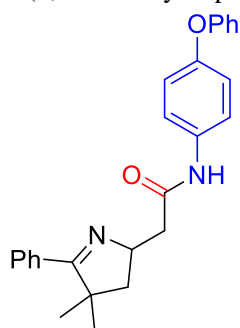

62.9 mg, yellow oil, yield: 79%. Eluent: pentane/ethyl acetate = 5/1 to 2/1.

**<sup>1</sup>H NMR** (300 MHz, CDCl<sub>3</sub>) δ 10.27 (br.s, 1H), 7.82 – 7.74 (m, 2H), 7.61 – 7.53 (m, 2H), 7.48 – 7.41 (m, 3H), 7.34 – 7.27 (m, 2H), 7.10 – 7.03 (m, 1H), 7.01 – 6.95 (m, 4H), 4.44 – 4.32 (m, 1H), 2.75 (dd, *J* = 15.4, 3.9 Hz, 1H), 2.63 (dd, *J* = 15.4, 10.1 Hz, 1H), 2.21 (dd, *J* = 12.6, 6.6 Hz, 1H), 1.65 (dd, *J* = 12.6, 9.2 Hz, 1H), 1.42 (s, 3H), 1.41 (s, 3H).

**<sup>13</sup>C NMR** (75 MHz, CDCl<sub>3</sub>) δ 180.4, 169.9, 157.8, 152.7, 134.3, 133.7, 130.1, 129.6, 128.4, 127.8, 122.7, 121.3, 119.7, 118.1, 64.1, 50.1, 48.2, 43.9, 27.0, 25.6.

**HR-MS** (ESI-TOF) calcd. for C<sub>26</sub>H<sub>26</sub>N<sub>2</sub>O<sub>2</sub> [M+H]<sup>+</sup>: 399.2072; found: 399.2065; [M+Na]<sup>+</sup>: 421.1886; found: 421.1880.

2-(4,4-Dimethyl-5-phenyl-3,4-dihydro-2H-pyrrol-2-yl)-N-(4-fluorophenyl)acetamide (**3m**)

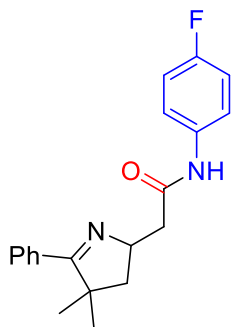

53.8 mg, yellow oil, yield: 83%. Eluent: pentane/ethyl acetate = 5/1 to 2/1.

**<sup>1</sup>H NMR** (300 MHz, CDCl<sub>3</sub>) δ 10.30 (br.s, 1H), 7.79 – 7.72 (m, 2H), 7.57 – 7.51 (m, 2H), 7.47 – 7.41 (m, 3H), 7.03 – 6.93 (m, 2H), 4.42 – 4.30 (m, 1H), 2.73 (dd, *J* = 15.5, 3.8 Hz, 1H), 2.59 (dd, *J* = 15.5, 10.3 Hz, 1H), 2.20 (dd, *J* = 12.6, 6.6 Hz, 1H), 1.64 (dd, *J* = 12.6, 9.2 Hz, 1H), 1.41 (s, 3H), 1.39 (s, 3H).

**<sup>13</sup>C NMR** (75 MHz, CDCl<sub>3</sub>) δ 180.5, 170.0, 158.9 (d, *J* = 242.4 Hz), 134.7 (d, *J* = 2.8 Hz), 133.7, 130.2, 128.4, 127.8, 121.3 (d, *J* = 7.7 Hz), 115.4 (d, *J* = 22.3 Hz), 64.1, 50.1, 48.2, 43.9, 27.0, 25.6.

**<sup>19</sup>F NMR** (282 MHz, CDCl<sub>3</sub>) δ -119.0.

**HR-MS** (ESI-TOF) calcd. for C<sub>20</sub>H<sub>21</sub>FN<sub>2</sub>O [M+H]<sup>+</sup>: 325.1716; found: 325.1716; [M+Na]<sup>+</sup>: 347.1530; found: 347.1536.

N-(4-Bromophenyl)-2-(4,4-dimethyl-5-phenyl-3,4-dihydro-2H-pyrrol-2-yl)acetamide (**3n**)

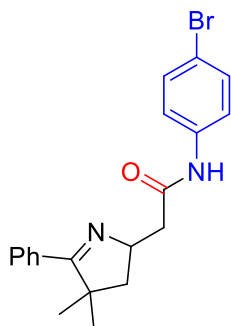

68.6 mg, yellow oil, yield: 89%. Eluent: pentane/ethyl acetate = 5/1 to 2/1.

**<sup>1</sup>H NMR** (300 MHz, CDCl<sub>3</sub>) δ 10.42 (br.s, 1H), 7.80 – 7.72 (m, 2H), 7.52 – 7.44 (m, 4H), 7.44 – 7.36 (m, 3H), 4.41 – 4.29 (m, 1H), 2.72 (dd, *J* = 15.5, 3.7 Hz, 1H), 2.58 (dd, *J* = 15.5, 10.4 Hz, 1H), 2.20 (dd, *J* = 12.6, 6.6 Hz, 1H), 1.63 (dd, *J* = 12.6, 9.3 Hz, 1H), 1.41 (s, 3H), 1.39 (s, 3H).

**<sup>13</sup>C NMR** (75 MHz, CDCl<sub>3</sub>) δ 180.6, 170.1, 137.7, 133.6, 131.7, 130.2, 128.4, 127.8, 121.2, 116.0, 64.0, 50.1, 48.2, 44.0, 27.0, 25.6.

**HR-MS** (ESI-TOF) calcd. for C<sub>20</sub>H<sub>21</sub>BrN<sub>2</sub>O [M+H]<sup>+</sup>: 385.0916; found: 385.0924; [M+Na]<sup>+</sup>: 407.0729; found: 407.0739.

2-(4,4-Dimethyl-5-phenyl-3,4-dihydro-2H-pyrrol-2-yl)-N-(4-iodophenyl)acetamide (**3o**)

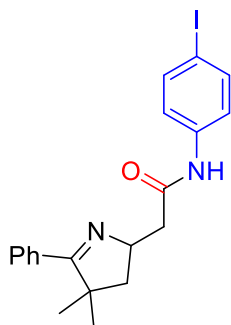

76.9 mg, yellow oil, yield: 89%. Eluent: pentane/ethyl acetate = 5/1 to 2/1.

$^1\text{H NMR}$  (300 MHz,  $\text{CDCl}_3$ )  $\delta$  10.44 (br.s, 1H), 7.81 – 7.72 (m, 2H), 7.62 – 7.55 (m, 2H), 7.50 – 7.40 (m, 3H), 7.39 – 7.32 (m, 2H), 4.39 – 4.26 (m, 1H), 2.69 (dd,  $J = 15.7, 3.6$  Hz, 1H), 2.56 (dd,  $J = 15.7, 10.7$  Hz, 1H), 2.20 (dd,  $J = 12.5, 6.5$  Hz, 1H), 1.59 (dd,  $J = 12.5, 9.3$  Hz, 1H), 1.41 (s, 3H), 1.40 (s, 3H).

$^{13}\text{C NMR}$  (75 MHz,  $\text{CDCl}_3$ )  $\delta$  180.3, 170.2, 138.4, 137.7, 133.7, 130.2, 128.4, 127.8, 121.5, 86.5, 64.0, 50.0, 48.4, 44.1, 27.0, 25.5.

**HR-MS** (ESI-TOF) calcd. for  $\text{C}_{20}\text{H}_{21}\text{IN}_2\text{O}$   $[\text{M}+\text{H}]^+$ : 433.0777; found: 433.0782;  $[\text{M}+\text{H}]^+$ : 455.0591; found: 455.0598.

Ethyl 4-(2-(4,4-dimethyl-5-phenyl-3,4-dihydro-2H-pyrrol-2-yl)acetamido)benzoate (**3p**)

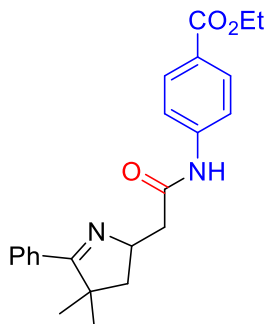

65.9 mg, yellow oil, yield: 87%. Eluent: pentane/ethyl acetate = 5/1 to 2/1.

$^1\text{H NMR}$  (300 MHz,  $\text{CDCl}_3$ )  $\delta$  10.62 (br.s, 1H), 8.02 – 7.96 (m, 2H), 7.78 – 7.72 (m, 2H), 7.70 – 7.63 (m, 2H), 7.47 – 7.40 (m, 3H), 4.44 – 4.29 (m, 1H), 4.34 (q,  $J = 7.0$  Hz, 2H), 2.78 (dd,  $J = 15.4, 3.8$  Hz, 1H), 2.62 (dd,  $J = 15.4, 10.0$  Hz, 1H), 2.20 (dd,  $J = 12.7, 6.7$  Hz, 1H), 1.67 (dd,  $J = 12.7, 9.2$  Hz, 1H), 1.42 (s, 3H), 1.38 (s, 3H), 1.37 (t,  $J = 7.1$  Hz, 3H).

$^{13}\text{C NMR}$  (75 MHz,  $\text{CDCl}_3$ )  $\delta$  180.9, 170.3, 166.2, 142.7, 133.4, 130.6, 130.3, 128.4, 127.8, 125.2, 118.7, 63.9, 60.6, 50.2, 47.8, 44.0, 26.9, 25.6, 14.3.

**HR-MS** (ESI-TOF) calcd. for  $\text{C}_{23}\text{H}_{26}\text{N}_2\text{O}_3$   $[\text{M}+\text{H}]^+$ : 379.2021; found: 379.2023.

N-(4-acetylphenyl)-2-(4,4-dimethyl-5-phenyl-3,4-dihydro-2H-pyrrol-2-yl)acetamide (**3q**)

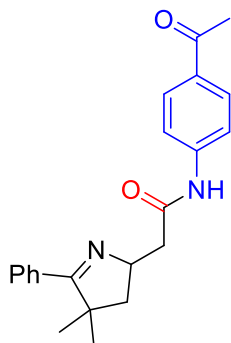

64.8 mg, yellow oil, yield: 93%. Eluent: pentane/ethyl acetate = 5/1 to 2/1.

**<sup>1</sup>H NMR** (300 MHz, CDCl<sub>3</sub>) δ 10.72 (br.s, 1H), 7.94 – 7.87 (m, 2H), 7.82 – 7.72 (m, 2H), 7.70 – 7.63 (m, 2H), 7.50 – 7.39 (m, 3H), 4.41 – 4.29 (m, 1H), 2.72 (dd, *J* = 15.6, 3.9 Hz, 1H), 2.60 (dd, *J* = 15.6, 10.4 Hz, 1H), 2.54 (s, 3H), 2.20 (dd, *J* = 12.5, 6.5 Hz, 1H), 1.60 (dd, *J* = 12.5, 9.3 Hz, 1H), 1.40 (s, 3H), 1.39 (s, 3H).

**<sup>13</sup>C NMR** (75 MHz, CDCl<sub>3</sub>) δ 196.9, 180.5, 170.4, 143.0, 133.6, 132.2, 130.2, 129.6, 128.4, 127.8, 118.8, 63.9, 50.1, 48.2, 44.1, 26.9, 26.3, 25.5.

**HR-MS** (ESI-TOF) calcd. for C<sub>22</sub>H<sub>24</sub>N<sub>2</sub>O<sub>2</sub> [M+H]<sup>+</sup>: 349.1916; found: 349.1921; [M+Na]<sup>+</sup>: 371.1730; found: 371.1740.

2-(4,4-Dimethyl-5-phenyl-3,4-dihydro-2*H*-pyrrol-2-yl)-*N*-(4-(1-hydroxyethyl)phenyl)acetamide (**3r**)

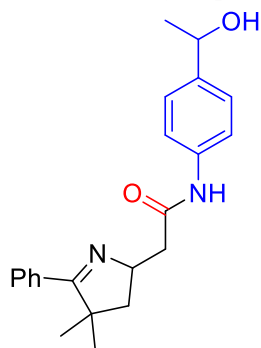

58.9 mg, yellow oil, yield: 84%. Eluent: pentane/ethyl acetate = 5/1 to 0/1.

**<sup>1</sup>H NMR** (300 MHz, CDCl<sub>3</sub>) δ 10.13 (br.s, 1H), 7.74 (dt, *J* = 7.6, 1.4 Hz, 2H), 7.50 (d, *J* = 8.5 Hz, 2H), 7.46 – 7.39 (m, 3H), 7.27 (d, *J* = 8.5 Hz, 2H), 4.80 (q, *J* = 6.4 Hz, 1H), 4.39 – 4.24 (m, 1H), 2.96 (br.s, 1H), 2.65 (dd, *J* = 15.5, 4.8 Hz, 1H), 2.58 (dd, *J* = 15.5, 9.2 Hz, 1H), 2.17 (dd, *J* = 12.6, 6.6 Hz, 1H), 1.60 (dd, *J* = 12.6, 9.3 Hz, 1H), 1.43 (d, *J* = 6.4 Hz, 3H), 1.37 (s, 3H), 1.37 (s, 3H).

**<sup>13</sup>C NMR** (75 MHz, CDCl<sub>3</sub>) δ 180.3, 170.1, 141.4, 137.5, 133.7, 130.0, 128.3, 127.8, 125.9, 119.8, 69.7, 64.1, 50.1, 48.1, 43.8, 27.0, 25.5, 25.0.

**HR-MS** (ESI-TOF) calcd. for C<sub>22</sub>H<sub>26</sub>N<sub>2</sub>O<sub>2</sub> [M+H]<sup>+</sup>: 351.2072; found: 351.2067; [M+H]<sup>+</sup>: 373.1886; found: 373.1881.

*N*-(4-Cyano-3-methylphenyl)-2-(4,4-dimethyl-5-phenyl-3,4-dihydro-2*H*-pyrrol-2-yl)acetamide (**3s**)

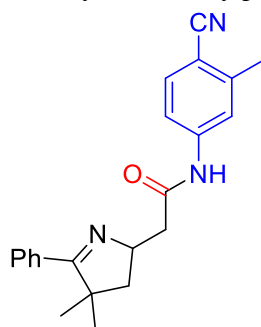

47.0 mg, yellow oil, yield: 68%. Eluent: pentane/ethyl acetate = 5/1 to 2/1.

**<sup>1</sup>H NMR** (300 MHz, CDCl<sub>3</sub>) δ 10.60 (br.s, 1H), 7.90 (d, *J* = 2.3 Hz, 1H), 7.79 – 7.72 (m, 2H), 7.61 (dd, *J* = 8.4, 2.4 Hz, 1H), 7.50 – 7.41 (m, 3H), 7.21 (dt, *J* = 8.4, 0.7 Hz, 1H), 4.39 – 4.28 (m, 1H), 2.70 (dd, *J* = 15.7, 3.4 Hz, 1H), 2.56 (dd, *J* = 15.7, 11.0 Hz, 1H), 2.48 (s, 3H), 2.21 (dd, *J* = 12.6, 6.6 Hz, 1H), 1.59 (dd, *J* = 12.6, 9.3 Hz, 1H), 1.41 (s, 3H), 1.40 (s, 3H).

**<sup>13</sup>C NMR** (75 MHz, CDCl<sub>3</sub>) δ 180.6, 170.4, 136.9, 136.7, 133.6, 130.6, 130.3, 128.5, 127.8, 123.9, 123.0, 117.9, 112.9, 63.9, 50.1, 48.4, 44.0, 27.0, 25.5, 19.8.

**HR-MS** (ESI-TOF) calcd. for C<sub>22</sub>H<sub>23</sub>N<sub>3</sub>O [M+H]<sup>+</sup>: 346.1919; found: 346.1917.

*N*-(2-Bromo-4-chlorophenyl)-2-(4,4-dimethyl-5-phenyl-3,4-dihydro-2*H*-pyrrol-2-yl)acetamide (**3t**)

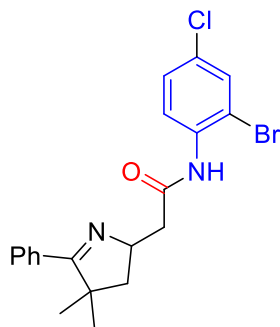

69.7 mg, yellow oil, yield: 83%. Eluent: pentane/ethyl acetate = 5/1 to 2/1.

$^1\text{H NMR}$  (300 MHz,  $\text{CDCl}_3$ )  $\delta$  10.26 (br.s, 1H), 8.34 (d,  $J = 8.9$  Hz, 1H), 7.88–7.74 (m, 2H), 7.51 (d,  $J = 2.4$  Hz, 1H), 7.44–7.37 (m, 3H), 7.26 (dd,  $J = 8.9, 2.4$  Hz, 1H), 4.44–4.31 (m, 1H), 2.76 (dd,  $J = 15.6, 3.9$  Hz, 1H), 2.66 (dd,  $J = 15.6, 10.3$  Hz, 1H), 2.21 (dd,  $J = 12.6, 6.6$  Hz, 1H), 1.61 (dd,  $J = 12.6, 9.3$  Hz, 1H), 1.41 (s, 6H).

$^{13}\text{C NMR}$  (75 MHz,  $\text{CDCl}_3$ )  $\delta$  180.4, 170.5, 135.6, 133.6, 131.8, 130.1, 129.0, 128.2, 128.1, 128.0, 123.3, 113.9, 63.9, 50.2, 48.4, 44.5, 27.0, 25.5.

**HR-MS** (ESI-TOF) calcd. for  $\text{C}_{20}\text{H}_{20}\text{BrClN}_2\text{O}$   $[\text{M}+\text{H}]^+$ : 419.0526; found: 419.0528.

2-(4,4-Dimethyl-5-phenyl-3,4-dihydro-2*H*-pyrrol-2-yl)-*N*-(3-fluoro-4-morpholinophenyl)acetamide (**3u**)

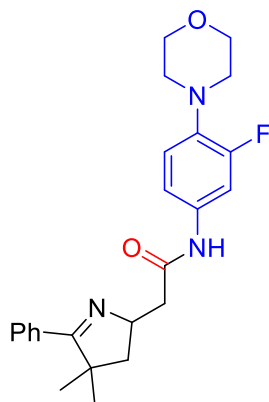

77.0 mg, yellow oil, yield: 94%. Eluent: pentane/ethyl acetate = 5/1 to 2/1.

$^1\text{H NMR}$  (300 MHz,  $\text{CDCl}_3$ )  $\delta$  10.29 (br.s, 1H), 7.83–7.71 (m, 2H), 7.51 (dd,  $J = 14.3, 2.4$  Hz, 1H), 7.48–7.36 (m, 3H), 7.13 (ddd,  $J = 8.6, 2.5, 1.1$  Hz, 1H), 6.85 (t,  $J = 9.0$  Hz, 1H), 4.42–4.22 (m, 1H), 3.90–3.78 (m, 4H), 3.08–2.94 (m, 4H), 2.68 (dd,  $J = 15.6, 3.9$  Hz, 1H), 2.56 (dd,  $J = 15.6, 10.4$  Hz, 1H), 2.22–2.15 (m, 1H), 1.58 (dd,  $J = 12.6, 9.3$  Hz, 1H), 1.39 (s, 3H), 1.39 (s, 3H).

$^{13}\text{C NMR}$  (75 MHz,  $\text{CDCl}_3$ )  $\delta$  180.2, 169.9, 155.4 (d,  $J = 245.3$  Hz), 135.8 (d,  $J = 9.2$  Hz), 133.9 (d,  $J = 10.7$  Hz), 133.7, 130.1, 128.4, 127.8, 118.7 (d,  $J = 4.2$  Hz), 115.4 (d,  $J = 3.3$  Hz), 108.7 (d,  $J = 25.4$  Hz), 66.9, 64.0, 51.1 (d,  $J = 2.9$  Hz), 50.0, 48.4, 44.0, 27.0, 25.5.

$^{19}\text{F NMR}$  (282 MHz,  $\text{CDCl}_3$ )  $\delta$  -121.4.

**HR-MS** (ESI-TOF) calcd. for  $\text{C}_{24}\text{H}_{28}\text{FN}_3\text{O}_2$   $[\text{M}+\text{H}]^+$ : 410.2244; found: 410.2244;  $[\text{M}+\text{Na}]^+$ : 432.2057; found: 432.2060.

*N*-(2,6-Diisopropylphenyl)-2-(4,4-dimethyl-5-phenyl-3,4-dihydro-2*H*-pyrrol-2-yl)acetamide (**3v**)

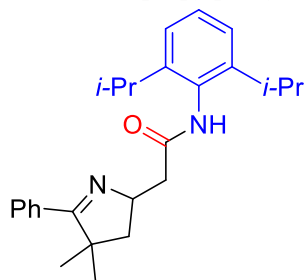

71.8 mg, yellow oil, yield: 92%. Eluent: pentane/ethyl acetate = 5/1 to 2/1.

**<sup>1</sup>H NMR** (300 MHz, CDCl<sub>3</sub>) δ 9.52 (br.s, 1H), 7.81–7.72 (m, 2H), 7.43–7.34 (m, 3H), 7.32–7.25 (m, 1H), 7.21–7.17 (m, 2H), 4.49–4.37 (m, 1H), 3.19 (sept, *J* = 6.9 Hz, 2H), 2.80 (dd, *J* = 15.6, 3.5 Hz, 1H), 2.64 (dd, *J* = 15.6, 10.8 Hz, 1H), 2.25 (dd, *J* = 12.6, 6.6 Hz, 1H), 1.66 (dd, *J* = 12.6, 9.2 Hz, 1H), 1.45 (s, 3H), 1.44 (s, 3H), 1.22 (t, *J* = 6.5 Hz, 12H).

**<sup>13</sup>C NMR** (75 MHz, CDCl<sub>3</sub>) δ 179.9, 171.3, 145.9, 133.7, 132.0, 130.1, 128.2, 127.9, 127.8, 123.3, 64.4, 50.1, 48.6, 43.5, 28.8, 27.1, 25.7, 23.6.

**HR-MS** (ESI-TOF) calcd. for C<sub>26</sub>H<sub>34</sub>N<sub>2</sub>O [M+H]<sup>+</sup>: 391.2749; found: 391.2750; [M+Na]<sup>+</sup>: 413.2563; found: 413.2571.

2-(4,4-Dimethyl-5-phenyl-3,4-dihydro-2*H*-pyrrol-2-yl)-*N*-(perfluorophenyl)acetamide (**3w**)

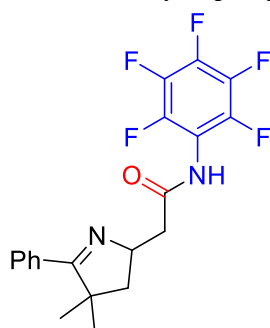

39.6 mg, yellow oil, yield: 50%. Eluent: pentane/ethyl acetate = 5/1 to 3/1.

**<sup>1</sup>H NMR** (300 MHz, CDCl<sub>3</sub>) δ 10.38 (br.s, 1H), 7.80–7.70 (m, 2H), 7.48–7.37 (m, 3H), 4.43–4.31 (m, 1H), 2.84 (dd, *J* = 15.8, 3.4 Hz, 1H), 2.60 (dd, *J* = 15.8, 11.1 Hz, 1H), 2.23 (dd, *J* = 12.6, 6.6 Hz, 1H), 1.63 (dd, *J* = 12.6, 9.4 Hz, 1H), 1.43 (s, 3H), 1.42 (s, 3H).

**<sup>13</sup>C NMR** (75 MHz, CDCl<sub>3</sub>) δ 180.6, 170.4, 133.4, 130.3, 128.4, 127.9, 63.7, 50.4, 48.3, 42.8, 27.0, 25.6.

**<sup>19</sup>F NMR** (282 MHz, CDCl<sub>3</sub>) δ -143.5–-146.8 (m), -158.4 (t, *J* = 21.5 Hz), -161.9–-163.5 (m).

**HR-MS** (ESI-TOF) calcd. for C<sub>20</sub>H<sub>17</sub>F<sub>5</sub>N<sub>2</sub>O [M+H]<sup>+</sup>: 397.1339; found: 397.1339; [M+Na]<sup>+</sup>: 419.1153; found: 419.1155.

2-(4,4-Dimethyl-5-phenyl-3,4-dihydro-2*H*-pyrrol-2-yl)-*N*-(9*H*-fluoren-2-yl)acetamide (**3x**)

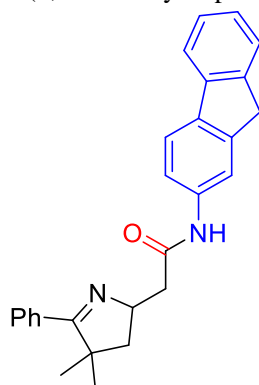

67.0 mg, yellow oil, yield: 85%. Eluent: pentane/ethyl acetate = 5/1 to 2/1.

**<sup>1</sup>H NMR** (300 MHz, CDCl<sub>3</sub>) δ 10.38 (br.s, 1H), 8.02 (s, 1H), 7.89 – 7.80 (m, 2H), 7.78 – 7.70 (m, 2H), 7.56 – 7.45 (m, 5H), 7.38 (t, *J* = 7.4 Hz, 1H), 7.29 (t, *J* = 7.4 Hz, 1H), 4.51 – 4.34 (m, 1H), 3.90 (s, 2H), 2.79 (dd, *J* = 15.5, 4.1 Hz, 1H), 2.69 (dd, *J* = 15.5, 10.0 Hz, 1H), 2.24 (dd, *J* = 12.5, 6.7 Hz, 1H), 1.68 (dd, *J* = 12.5, 9.2 Hz, 1H), 1.45 (s, 3H), 1.44 (s, 3H).

**<sup>13</sup>C NMR** (75 MHz, CDCl<sub>3</sub>) δ 180.3, 170.0, 144.2, 143.1, 141.4, 137.5, 137.4, 133.7, 130.1, 128.3, 127.9, 126.6, 126.0, 124.8, 119.9, 119.3, 118.4, 116.6, 64.2, 50.0, 48.3, 44.1, 37.0, 27.0, 25.5.

**HR-MS** (ESI-TOF) calcd. for C<sub>27</sub>H<sub>26</sub>N<sub>2</sub>O [M+H]<sup>+</sup>: 395.2123; found: 395.2126; [M+Na]<sup>+</sup>: 417.1937; found: 417.1943.

2-(4,4-Dimethyl-5-phenyl-3,4-dihydro-2*H*-pyrrol-2-yl)-*N*-(naphthalen-1-yl)acetamide (**3y**)

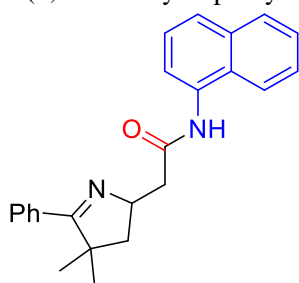

68.4 mg, yellow oil, yield: 96%. Eluent: pentane/ethyl acetate = 5/1 to 2/1.

**<sup>1</sup>H NMR** (300 MHz, CDCl<sub>3</sub>) δ 11.07 (br.s, 1H), 8.42 (d, *J* = 7.6 Hz, 1H), 8.22 (d, *J* = 8.6 Hz, 1H), 7.94 – 7.83 (m, 3H), 7.65 (d, *J* = 8.2 Hz, 1H), 7.56 – 7.44 (m, 5H), 7.33 – 7.24 (m, 1H), 4.58 – 4.43 (m, 1H), 2.92 (dd, *J* = 15.6, 3.4 Hz, 1H), 2.79 (dd, *J* = 15.6, 10.9 Hz, 1H), 2.28 (dd, *J* = 12.6, 6.6 Hz, 1H), 1.72 (dd, *J* = 12.6, 9.2 Hz, 1H), 1.48 (s, 3H), 1.47 (s, 3H).

**<sup>13</sup>C NMR** (75 MHz, CDCl<sub>3</sub>) δ 180.9, 170.5, 133.9, 133.8, 133.7, 130.2, 129.8, 128.4, 128.3, 128.0, 125.9, 125.6, 125.6, 124.0, 121.4, 118.0, 64.3, 50.1, 48.2, 44.4, 27.0, 25.5.

**HR-MS** (ESI-TOF) calcd. for C<sub>24</sub>H<sub>24</sub>N<sub>2</sub>O [M+H]<sup>+</sup>: 357.1967; found: 357.1973; [M+Na]<sup>+</sup>: 379.1781; found: 379.1788.

2-(4,4-Dimethyl-5-phenyl-3,4-dihydro-2*H*-pyrrol-2-yl)-*N*-methyl-*N*-phenylacetamide (**3z**)

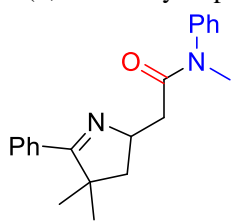

55.1 mg, yellow oil, yield: 86%. Eluent: pentane/ethyl acetate = 5/1 to 2/1.

**<sup>1</sup>H NMR** (300 MHz, CDCl<sub>3</sub>) δ 7.60 (dd, *J* = 7.4, 2.3 Hz, 2H), 7.41 – 7.27 (m, 6H), 7.25 – 7.17 (m, 2H), 4.51 – 4.38 (m, 1H), 3.28 (s, 3H), 2.87 (dd, *J* = 15.6, 5.3 Hz, 1H), 2.27 (dd, *J* = 12.6, 6.7 Hz, 1H), 2.14 (dd, *J* = 15.6, 9.2 Hz, 1H), 1.48 (dd, *J* = 12.6, 8.8 Hz, 1H), 1.31 (s, 3H), 1.24 (s, 3H).

**<sup>13</sup>C NMR** (75 MHz, CDCl<sub>3</sub>) δ 179.7, 171.2, 143.9, 134.6, 129.6, 129.2, 127.9, 127.7, 127.6, 127.4, 65.2, 50.4, 48.4, 41.1, 37.2, 27.1, 25.7.

**HR-MS** (ESI-TOF) calcd. for C<sub>21</sub>H<sub>24</sub>N<sub>2</sub>O [M+H]<sup>+</sup>: 321.1967; found: 321.1958; [M+H]<sup>+</sup>: 343.1781; found: 343.1785.

2-(4,4-Dimethyl-5-phenyl-3,4-dihydro-2H-pyrrol-2-yl)-1-(indolin-1-yl)ethan-1-one (**3aa**)

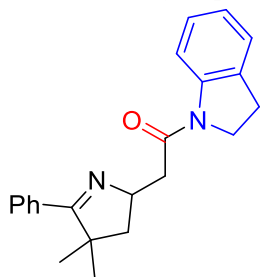

43.2 mg, yellow oil, yield: 65%. Eluent: pentane/ethyl acetate = 5/1 to 2/1.

**<sup>1</sup>H NMR** (300 MHz, CDCl<sub>3</sub>) δ 8.27 (d, *J* = 7.9 Hz, 1H), 7.74–7.65 (m, 2H), 7.41–7.34 (m, 3H), 7.24–7.15 (m, 2H), 7.01 (td, *J* = 7.4, 1.1 Hz, 1H), 4.64–4.50 (m, 1H), 4.23–4.03 (m, 2H), 3.26 (dd, *J* = 15.8, 4.7 Hz, 1H), 3.20 (t, *J* = 8.5 Hz, 2H), 2.52 (dd, *J* = 15.8, 9.3 Hz, 1H), 2.43 (dd, *J* = 12.7, 6.7 Hz, 1H), 1.67 (dd, *J* = 12.5, 8.8 Hz, 1H), 1.38 (s, 3H), 1.37 (s, 3H).

**<sup>13</sup>C NMR** (75 MHz, CDCl<sub>3</sub>) δ 180.2, 169.6, 143.0, 134.7, 131.1, 129.5, 128.1, 127.8, 127.5, 124.5, 123.6, 117.0, 64.8, 50.7, 48.9, 48.1, 43.2, 28.0, 27.3, 25.7.

**HR-MS** (ESI-TOF) calcd. for C<sub>22</sub>H<sub>24</sub>N<sub>2</sub>O [M+H]<sup>+</sup>: 333.1967; found: 333.1973; [M+Na]<sup>+</sup>: 355.1781; found: 355.1791.

*N*-(*tert*-Butyl)-2-(4,4-dimethyl-5-phenyl-3,4-dihydro-2H-pyrrol-2-yl)acetamide (**3ab**)

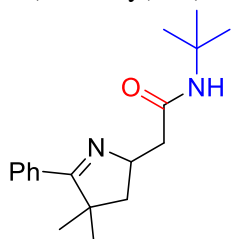

31.5 mg, yellow oil, yield: 55%. Eluent: pentane/ethyl acetate = 5/1 to 2/1.

**<sup>1</sup>H NMR** (300 MHz, CDCl<sub>3</sub>) δ 7.79–7.70 (m, 2H), 7.43–7.35 (m, 3H), 7.32 (br.s, 1H), 4.28–4.19 (m, 1H), 2.50 (dd, *J* = 15.0, 5.3 Hz, 1H), 2.44 (dd, *J* = 15.0, 8.2 Hz, 1H), 2.12 (dd, *J* = 12.6, 6.7 Hz, 1H), 1.59 (dd, *J* = 12.6, 9.3 Hz, 1H), 1.37 (s, 3H), 1.37 (s, 3H), 1.35 (s, 9H).

**<sup>13</sup>C NMR** (75 MHz, CDCl<sub>3</sub>) δ 179.5, 170.9, 133.9, 129.9, 128.2, 127.8, 64.6, 50.7, 50.1, 48.0, 44.0, 28.8, 27.1, 25.6.

**HR-MS** (ESI-TOF) calcd. for C<sub>18</sub>H<sub>26</sub>N<sub>2</sub>O [M+H]<sup>+</sup>: 287.2123; found: 287.2125; [M+Na]<sup>+</sup>: 309.1937; found: 309.1945.

*N*-(4-(*tert*-Butyl)benzyl)-2-(4,4-dimethyl-5-phenyl-3,4-dihydro-2H-pyrrol-2-yl)acetamide (**3ac**)

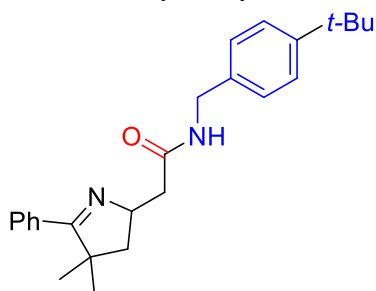

24.9 mg, yellow oil, yield: 33%. Eluent: pentane/ethyl acetate = 5/1 to 2/1.

**<sup>1</sup>H NMR** (400 MHz, CDCl<sub>3</sub>) δ 7.85 (br.s, 1H), 7.62–7.55 (m, 2H), 7.34–7.31 (m, 1H), 7.29–7.23 (m, 4H), 7.19–7.16 (m, 2H), 4.45 (dd, *J* = 14.8, 5.9 Hz, 1H), 4.32 (dd, *J* = 14.8, 5.2 Hz, 1H), 4.27–4.17 (m, 1H), 2.58 (dd, *J* = 15.2, 4.4 Hz, 1H), 2.44 (dd, *J* = 15.2, 9.4 Hz, 1H), 2.08 (dd, *J* = 12.5, 6.6 Hz, 1H), 1.52 (dd, *J* = 12.5, 9.2 Hz, 1H), 1.29 (s, 3H), 1.27 (s, 3H), 1.22 (s, 9H).



<sup>13</sup>C NMR (101 MHz, CDCl<sub>3</sub>) δ 179.9, 171.6, 150.0, 135.6, 133.8, 129.9, 128.2, 127.9, 127.4, 125.4, 64.4, 50.1, 48.2, 43.0, 34.4, 31.3, 31.3, 27.1, 25.6.

**HR-MS** (ESI-TOF) calcd. for C<sub>25</sub>H<sub>32</sub>N<sub>2</sub>O [M+H]<sup>+</sup>: 377.2593; found: 377.2585; [M+Na]<sup>+</sup>: 399.2407; found: 399.2414.

2-(4,4-Dimethyl-5-phenyl-3,4-dihydro-2H-pyrrol-2-yl)-N-(pyridin-2-yl)acetamide (**3ad**)

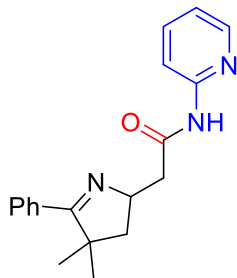

41.8 mg, yellow oil, yield: 68%. Eluent: pentane/ethyl acetate = 5/1 to 1/1.

<sup>1</sup>H NMR (300 MHz, CDCl<sub>3</sub>) δ 10.23 (br.s, 1H), 8.19–8.13 (m, 2H), 7.75–7.65 (m, 2H), 7.57 (ddd, *J* = 8.5, 7.3, 2.0 Hz, 1H), 7.33–7.27 (m, 3H), 6.92–6.86 (m, 1H), 4.39–4.26 (m, 1H), 2.67 (dd, *J* = 15.3, 8.8 Hz, 1H), 2.59 (dd, *J* = 15.3, 5.4 Hz, 1H), 2.10 (dd, *J* = 12.5, 6.6 Hz, 1H), 1.52 (dd, *J* = 12.5, 9.3 Hz, 1H), 1.29 (s, 3H), 1.27 (s, 3H).

<sup>13</sup>C NMR (75 MHz, CDCl<sub>3</sub>) δ 180.1, 170.5, 151.8, 147.7, 138.1, 133.9, 129.9, 128.2, 128.0, 119.3, 114.2, 64.1, 50.2, 48.4, 44.3, 27.0, 25.5.

**HR-MS** (ESI-TOF) calcd. for C<sub>19</sub>H<sub>21</sub>N<sub>3</sub>O [M+H]<sup>+</sup>: 308.1763; found: 308.1767.

N-(2-Chloro-4-methylpyridin-3-yl)-2-(4,4-dimethyl-5-phenyl-3,4-dihydro-2H-pyrrol-2-yl)acetamide (**3ae**)

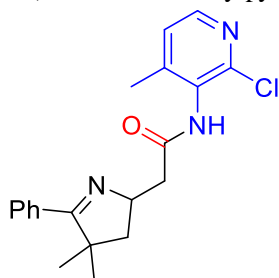

24.9 mg, yellow oil, yield: 35%. Eluent: pentane/ethyl acetate = 5/1 to 1/1.

<sup>1</sup>H NMR (300 MHz, CDCl<sub>3</sub>) δ 10.18 (br.s, 1H), 8.13 (d, *J* = 4.9 Hz, 1H), 7.87–7.70 (m, 2H), 7.44–7.36 (m, 3H), 7.12 (d, *J* = 4.9 Hz, 1H), 4.49–4.38 (m, 1H), 2.81 (dd, *J* = 15.6, 3.9 Hz, 1H), 2.66 (dd, *J* = 15.6, 10.6 Hz, 1H), 2.32 (s, 3H), 2.24 (dd, *J* = 12.6, 6.6 Hz, 1H), 1.67 (dd, *J* = 12.6, 9.3 Hz, 1H), 1.44 (s, 3H), 1.43 (s, 3H).

<sup>13</sup>C NMR (75 MHz, CDCl<sub>3</sub>) δ 180.4, 170.3, 148.3, 147.8, 146.4, 133.5, 130.7, 130.3, 128.3, 128.0, 124.9, 64.0, 50.2, 48.3, 43.2, 27.1, 25.6, 19.0.

**HR-MS** (ESI-TOF) calcd. for C<sub>20</sub>H<sub>22</sub>ClN<sub>3</sub>O [M+H]<sup>+</sup>: 356.1530; found: 356.1525.

2-(4,4-Dimethyl-5-phenyl-3,4-dihydro-2H-pyrrol-2-yl)-N-(quinolin-8-yl)acetamide (**3af**)

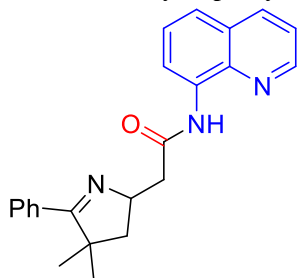

50.1 mg, yellow oil, yield: 70%. Eluent: pentane/ethyl acetate = 5/1 to 1/5.

**<sup>1</sup>H NMR** (300 MHz, CDCl<sub>3</sub>) δ 11.21 (br.s, 1H), 8.88 (dd, *J* = 7.4, 1.7 Hz, 1H), 8.78 (dd, *J* = 4.2, 1.7 Hz, 1H), 8.13 (dd, *J* = 8.3, 1.7 Hz, 1H), 8.10 – 8.01 (m, 2H), 7.57 – 7.47 (m, 2H), 7.46 – 7.39 (m, 4H), 4.57 – 4.45 (m, 1H), 2.94 (dd, *J* = 14.9, 8.8 Hz, 1H), 2.85 (dd, *J* = 14.9, 5.1 Hz, 1H), 2.26 (dd, *J* = 12.6, 6.6 Hz, 1H), 1.71 (dd, *J* = 12.6, 9.3 Hz, 1H), 1.43 (s, 6H).

**<sup>13</sup>C NMR** (75 MHz, CDCl<sub>3</sub>) δ 179.7, 170.6, 148.1, 138.9, 136.1, 135.3, 134.1, 129.9, 128.4, 128.1, 128.0, 127.4, 121.4, 121.3, 116.9, 64.5, 50.2, 48.6, 45.3, 27.3, 25.7.

**HR-MS** (ESI-TOF) calcd. for C<sub>23</sub>H<sub>23</sub>N<sub>3</sub>O [M+H]<sup>+</sup>: 358.1919; found: 358.1921; [M+Na]<sup>+</sup>: 380.1733; found: 380.1738.

2-(4,4-Dimethyl-5-phenyl-3,4-dihydro-2H-pyrrol-2-yl)-*N*-(isoquinolin-1-yl)acetamide (**3ag**)

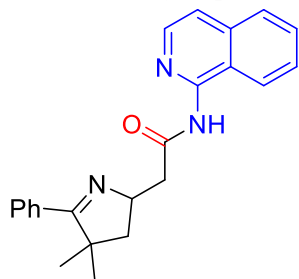

60.8 mg, yellow oil, yield: 85%. Eluent: pentane/ethyl acetate = 5/1 to 0/1.

**<sup>1</sup>H NMR** (300 MHz, CDCl<sub>3</sub>) δ 8.33 (d, *J* = 5.8 Hz, 1H), 8.19 (d, *J* = 8.5 Hz, 1H), 7.82 – 7.73 (m, 3H), 7.64 – 7.58 (m, 1H), 7.46 – 7.33 (m, 5H), 4.56 – 4.44 (m, 1H), 2.88 (dd, *J* = 15.5, 4.5 Hz, 1H), 2.80 (dd, *J* = 15.5, 10.2 Hz, 1H), 2.26 (dd, *J* = 12.6, 6.6 Hz, 1H), 1.67 (dd, *J* = 12.5, 9.3 Hz, 1H), 1.42 (s, 6H).

**<sup>13</sup>C NMR** (75 MHz, CDCl<sub>3</sub>) δ 180.8, 170.8, 149.9, 140.8, 137.5, 133.9, 130.2, 130.0, 128.2, 128.0, 127.0, 126.9, 124.2, 121.9, 117.9, 64.2, 50.2, 48.4, 44.6, 27.0, 25.5.

**HR-MS** (ESI-TOF) calcd. for C<sub>23</sub>H<sub>23</sub>N<sub>3</sub>O [M+H]<sup>+</sup>: 358.1919; found: 358.1920. [M+Na]<sup>+</sup>: 380.1733; found: 380.1736.

2-(4,4-Dimethyl-5-phenyl-3,4-dihydro-2H-pyrrol-2-yl)-*N*-(pyrazin-2-yl)acetamide (**3ah**)

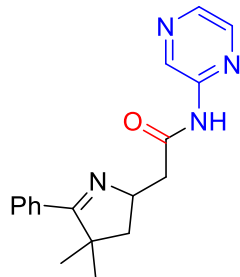

42.5 mg, yellow oil, yield: 69%. Eluent: pentane/ethyl acetate = 5/1 to 1/5.

**<sup>1</sup>H NMR** (300 MHz, CDCl<sub>3</sub>) δ 10.77 (br.s, 1H), 9.56 (d, *J* = 1.6 Hz, 1H), 8.28 (dd, *J* = 2.7, 0.5 Hz, 1H), 8.23 (dd, *J* = 2.6, 1.5 Hz, 1H), 7.88 – 7.76 (m, 2H), 7.45 – 7.37 (m, 3H), 4.44 – 4.32 (m, 1H), 2.77 (dd, *J* = 15.5, 4.1 Hz, 1H), 2.66 (dd, *J* = 15.5, 10.1 Hz, 1H), 2.21 (dd, *J* = 12.6, 6.6 Hz, 1H), 1.61 (dd, *J* = 12.6, 9.3 Hz, 1H), 1.41 (s, 3H), 1.39 (s, 3H).

**<sup>13</sup>C NMR** (75 MHz, CDCl<sub>3</sub>) δ 180.3, 170.5, 148.6, 142.2, 139.7, 137.2, 133.5, 130.1, 128.3, 128.0, 63.7, 50.1, 48.4, 43.9, 27.0, 25.5.

**HR-MS** (ESI-TOF) calcd. for C<sub>18</sub>H<sub>20</sub>N<sub>4</sub>O [M+H]<sup>+</sup>: 309.1715; found: 309.1712; [M+Na]<sup>+</sup>: 331.1529; found: 331.1534.

*N*-(Benzo[*d*]thiazol-6-yl)-2-(4,4-dimethyl-5-phenyl-3,4-dihydro-2*H*-pyrrol-2-yl)acetamide (**3ai**)

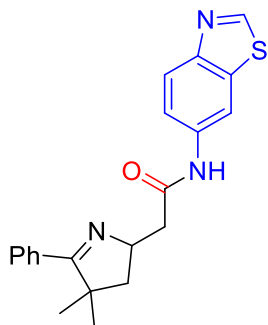

66.9 mg, yellow oil, yield: 92%. Eluent: pentane/ethyl acetate = 5/1 to 1/5.

**<sup>1</sup>H NMR** (300 MHz, CDCl<sub>3</sub>) δ 10.67 (br.s, 1H), 8.86 (s, 1H), 8.63 (d, *J* = 2.1 Hz, 1H), 7.99 (d, *J* = 8.8 Hz, 1H), 7.82 – 7.74 (m, 2H), 7.49 – 7.40 (m, 3H), 7.35 (dd, *J* = 8.8, 2.1 Hz, 1H), 4.43 – 4.31 (m, 1H), 2.73 (dd, *J* = 15.7, 3.7 Hz, 1H), 2.62 (dd, *J* = 15.7, 10.4 Hz, 1H), 2.20 (dd, *J* = 12.6, 6.2 Hz, 1H), 1.60 (dd, *J* = 12.6, 9.3 Hz, 1H), 1.40 (s, 3H), 1.39 (s, 3H).

**<sup>13</sup>C NMR** (75 MHz, CDCl<sub>3</sub>) δ 180.4, 170.3, 152.8, 149.4, 136.4, 134.6, 133.7, 130.1, 128.4, 127.8, 123.3, 118.9, 112.0, 64.0, 50.0, 48.3, 44.0, 27.0, 25.5.

**HR-MS** (ESI-TOF) calcd. for C<sub>21</sub>H<sub>21</sub>N<sub>3</sub>OS [M+H]<sup>+</sup>: 364.1483; found: 364.1489; [M+Na]<sup>+</sup>: 386.1297; found: 386.1308.

2-(4,4-Dimethyl-5-phenyl-3,4-dihydro-2*H*-pyrrol-2-yl)-*N*-(5-methylisoxazol-3-yl)acetamide (**3aj**)

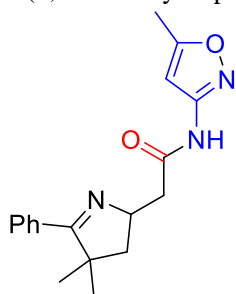

44.8 mg, yellow oil, yield: 72%. Eluent: pentane/ethyl acetate = 5/1 to 1/5.

**<sup>1</sup>H NMR** (400 MHz, CDCl<sub>3</sub>) δ 10.84 (br.s, 1H), 7.81 – 7.72 (m, 2H), 7.45 – 7.37 (m, 3H), 6.71 (s, 1H), 4.39 – 4.29 (m, 1H), 2.71 (dd, *J* = 15.5, 4.6 Hz, 1H), 2.63 (ddd, *J* = 15.5, 10.0, 1.6 Hz, 1H), 2.38 (s, 3H), 2.19 (dd, *J* = 12.5, 6.5 Hz, 1H), 1.59 (dd, *J* = 12.5, 9.3 Hz, 1H), 1.39 (s, 3H), 1.38 (s, 3H).

**<sup>13</sup>C NMR** (101 MHz, CDCl<sub>3</sub>) δ 180.3, 170.1, 169.5, 158.1, 133.5, 130.1, 128.3, 128.0, 96.6, 63.7, 50.2, 48.3, 43.6, 27.1, 25.5, 12.6.

**HR-MS** (ESI-TOF) calcd. for C<sub>18</sub>H<sub>21</sub>N<sub>3</sub>O<sub>2</sub> [M+H]<sup>+</sup>: 312.1712; found: 312.1715; [M+Na]<sup>+</sup>: 334.1526; found: 334.1536.

2-(4,4-Dimethyl-5-phenyl-3,4-dihydro-2*H*-pyrrol-2-yl)-*N*-(1*H*-indol-6-yl)acetamide (**3ak**)

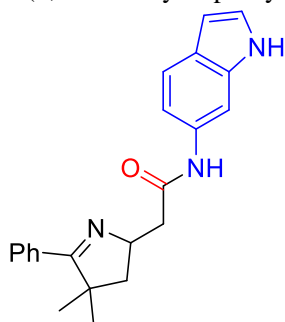

61.5 mg, yellow oil, yield: 89%. Eluent: pentane/ethyl acetate = 3/1 to 1/5.

**<sup>1</sup>H NMR** (300 MHz, CDCl<sub>3</sub>) δ 9.88 (br.s, 1H), 8.38 (br.s, 1H), 7.85 (s, 1H), 7.74–7.65 (m, 2H), 7.39–7.29 (m, 3H), 7.21–7.14 (m, 2H), 7.05 (t, *J* = 2.7 Hz, 1H), 6.39 (t, *J* = 2.6 Hz, 1H), 4.39–4.25 (m, 1H), 2.68 (dd, *J* = 15.4, 4.3 Hz, 1H), 2.58 (dd, *J* = 15.4, 9.6 Hz, 1H), 2.11 (dd, *J* = 12.6, 6.4 Hz, 1H), 1.58 (dd, *J* = 12.6, 9.3 Hz, 1H), 1.32 (s, 3H), 1.30 (s, 3H).

**<sup>13</sup>C NMR** (75 MHz, CDCl<sub>3</sub>) δ 180.3, 170.0, 133.8, 133.0, 131.0, 130.0, 128.3, 128.0, 127.9, 125.0, 116.2, 112.2, 111.1, 102.5, 64.4, 50.1, 48.2, 44.0, 27.0, 25.6.

**HR-MS** (ESI-TOF) calcd. for C<sub>22</sub>H<sub>23</sub>N<sub>3</sub>O [M+H]<sup>+</sup>: 346.1919; found: 346.1919; [M+H]<sup>+</sup>: 368.1733; found: 368.1741.

2-(4,4-Dimethyl-5-phenyl-3,4-dihydro-2*H*-pyrrol-2-yl)-*N*-(4-(phenylamino)phenyl)acetamide (**3al**)

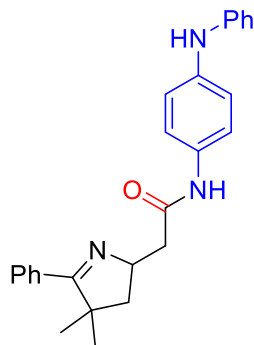

57.2 mg, yellow oil, yield: 72%. Eluent: pentane/ethyl acetate = 3/1 to 0/1.

**<sup>1</sup>H NMR** (300 MHz, CDCl<sub>3</sub>) δ 10.01 (br.s, 1H), 7.76–7.63 (m, 2H), 7.43–7.31 (m, 5H), 7.18–7.10 (m, 2H), 6.98–6.87 (m, 4H), 6.83–6.73 (m, 1H), 5.25 (br.s, 1H), 4.35–4.22 (m, 1H), 2.65 (dd, *J* = 15.4, 4.0 Hz, 1H), 2.53 (dd, *J* = 15.4, 9.9 Hz, 1H), 2.11 (dd, *J* = 12.6, 6.6 Hz, 1H), 1.57 (dd, *J* = 12.6, 9.2 Hz, 1H), 1.32 (s, 3H), 1.31 (s, 3H).

**<sup>13</sup>C NMR** (75 MHz, CDCl<sub>3</sub>) δ 180.4, 169.8, 143.8, 138.8, 133.7, 132.6, 130.1, 129.3, 128.4, 127.9, 121.2, 120.2, 119.3, 116.7, 64.2, 50.1, 48.1, 43.9, 27.0, 25.6.

**HR-MS** (ESI-TOF) calcd. for C<sub>26</sub>H<sub>27</sub>N<sub>3</sub>O [M+H]<sup>+</sup>: 398.2232; found: 398.2239; [M+Na]<sup>+</sup>: 420.2046; found: 420.2058.

*N,N'*-(1,4-Phenylene)bis(2-(4,4-dimethyl-5-phenyl-3,4-dihydro-2*H*-pyrrol-2-yl)acetamide) (**3am**)

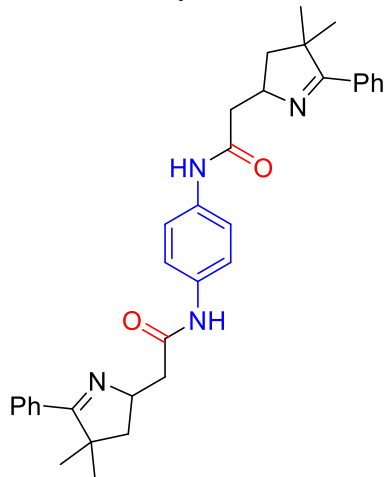

34.8 mg, yellow oil, yield: 65%. Eluent: pentane/ethyl acetate = 3/1 to 0/1.

**<sup>1</sup>H NMR** (300 MHz, CDCl<sub>3</sub>) δ 10.21 (br.s, 2H), 7.84–7.72 (m, 4H), 7.57–7.48 (m, 4H), 7.48–7.39 (m, 6H), 4.41–4.27 (m, 2H), 2.70 (dd, *J* = 15.6, 3.8 Hz, 2H), 2.58 (dd, *J* = 15.6, 10.4 Hz, 2H), 2.19 (dd, *J* = 12.6, 6.6 Hz, 2H), 1.60 (dd, *J* = 12.6, 9.2 Hz, 2H), 1.40 (s, 12H).

$^{13}\text{C}$  NMR (75 MHz,  $\text{CDCl}_3$ )  $\delta$  180.1, 169.9, 134.5, 133.7, 130.2, 128.4, 127.9, 120.2, 64.1, 50.0, 48.4, 44.1, 27.1, 25.6.

**HR-MS** (ESI-TOF) calcd. for  $\text{C}_{34}\text{H}_{38}\text{N}_4\text{O}_2$   $[\text{M}+\text{H}]^+$ : 535.3073; found: 535.3068;  $[\text{M}+\text{Na}]^+$ : 557.2887; found: 557.2892.

2-(4,4-Dimethyl-5-(*p*-tolyl)-3,4-dihydro-2*H*-pyrrol-2-yl)-*N*-phenylacetamide (**4a**)

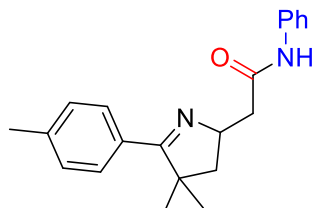

59.6 mg, yellow oil, yield: 93%. Eluent: pentane/ethyl acetate = 5/1 to 2/1.

$^1\text{H}$  NMR (300 MHz,  $\text{CDCl}_3$ )  $\delta$  10.36 (br.s, 1H), 7.75–7.67 (m, 2H), 7.60–7.54 (m, 2H), 7.32–7.25 (m, 2H), 7.26–7.20 (m, 2H), 7.08–7.01 (m, 1H), 4.38–4.26 (m, 1H), 2.68 (dd,  $J$  = 15.6, 3.9 Hz, 1H), 2.58 (dd,  $J$  = 15.6, 10.3 Hz, 1H), 2.39 (s, 3H), 2.17 (dd,  $J$  = 12.6, 6.5 Hz, 1H), 1.57 (dd,  $J$  = 12.6, 9.3 Hz, 1H), 1.39 (s, 6H).

$^{13}\text{C}$  NMR (75 MHz,  $\text{CDCl}_3$ )  $\delta$  179.7, 170.1, 140.3, 138.6, 130.9, 129.0, 128.8, 127.8, 123.5, 119.6, 63.9, 49.9, 48.5, 44.2, 27.1, 25.5, 21.3.

**HR-MS** (ESI-TOF) calcd. for  $\text{C}_{21}\text{H}_{24}\text{N}_2\text{O}$   $[\text{M}+\text{H}]^+$ : 321.1967; found: 321.1960;  $[\text{M}+\text{Na}]^+$ : 343.1781; found: 343.1792.

2-(5-(4-(*tert*-Butyl)phenyl)-4,4-dimethyl-3,4-dihydro-2*H*-pyrrol-2-yl)-*N*-phenylacetamide (**4b**)

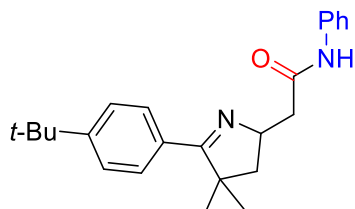

66.0 mg, yellow oil, yield: 91%. Eluent: pentane/ethyl acetate = 5/1 to 2/1.

$^1\text{H}$  NMR (300 MHz,  $\text{CDCl}_3$ )  $\delta$  10.40 (br.s, 1H), 7.83–7.74 (m, 2H), 7.64–7.57 (m, 2H), 7.49–7.43 (m, 2H), 7.36–7.28 (m, 2H), 7.11–7.04 (m, 1H), 4.41–4.29 (m, 1H), 2.72 (dd,  $J$  = 15.5, 3.7 Hz, 1H), 2.59 (dd,  $J$  = 15.5, 10.4 Hz, 1H), 2.19 (dd,  $J$  = 12.6, 6.6 Hz, 1H), 1.61 (dd,  $J$  = 12.6, 9.2 Hz, 1H), 1.43 (s, 3H), 1.42 (s, 3H), 1.37 (s, 9H).

$^{13}\text{C}$  NMR (75 MHz,  $\text{CDCl}_3$ )  $\delta$  179.7, 170.2, 153.5, 138.6, 130.7, 128.8, 127.7, 125.3, 123.6, 119.7, 63.9, 49.9, 48.5, 44.2, 34.8, 31.1, 27.2, 25.6.

**HR-MS** (ESI-TOF) calcd. for  $\text{C}_{24}\text{H}_{30}\text{N}_2\text{O}$   $[\text{M}+\text{H}]^+$ : 363.2436; found: 363.2438;  $[\text{M}+\text{Na}]^+$ : 385.2250; found: 385.2255.

2-(5-(4-(Benzyloxy)phenyl)-4,4-dimethyl-3,4-dihydro-2*H*-pyrrol-2-yl)-*N*-phenylacetamide (**4c**)

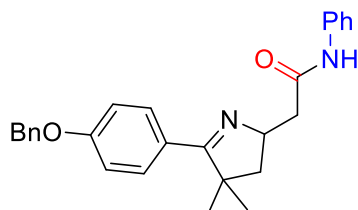

72.6 mg, yellow oil, yield: 88%. Eluent: pentane/ethyl acetate = 5/1 to 2/1.

$^1\text{H}$  NMR (300 MHz,  $\text{CDCl}_3$ )  $\delta$  10.42 (br.s, 1H), 7.90–7.78 (m, 2H), 7.68–7.58 (m, 2H), 7.50–7.28 (m, 7H), 7.14–7.00 (m, 3H), 5.13 (s, 2H), 4.41–4.25 (m, 1H), 2.70 (dd,  $J$  = 15.6, 3.7 Hz, 1H), 2.59 (dd,  $J$  = 15.6, 10.5 Hz, 1H), 2.19 (dd,  $J$  = 12.6, 6.3 Hz, 1H), 1.59 (dd,  $J$  = 12.6, 9.3 Hz, 1H), 1.43 (s, 3H), 1.42 (s, 3H).

<sup>13</sup>C NMR (75 MHz, CDCl<sub>3</sub>) δ 178.9, 170.2, 160.3, 138.6, 136.4, 129.6, 128.8, 128.6, 128.1, 127.4, 126.3, 123.6, 119.7, 114.6, 70.0, 63.7, 49.7, 48.7, 44.2, 27.2, 25.6.

HR-MS (ESI-TOF) calcd. for C<sub>27</sub>H<sub>28</sub>N<sub>2</sub>O<sub>2</sub> [M+H]<sup>+</sup>: 413.2229; found: 413.2229; [M+Na]<sup>+</sup>: 435.2043; found: 435.2049.

2-(4,4-Dimethyl-5-(4-phenoxyphenyl)-3,4-dihydro-2H-pyrrol-2-yl)-N-phenylacetamide (**4d**)

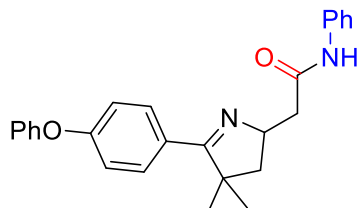

58.2 mg, yellow oil, yield: 73%. Eluent: pentane/ethyl acetate = 5/1 to 2/1.

<sup>1</sup>H NMR (300 MHz, CDCl<sub>3</sub>) δ 10.29 (br.s, 1H), 7.89–7.76 (m, 2H), 7.66–7.51 (m, 2H), 7.43–7.28 (m, 4H), 7.22–7.14 (m, 1H), 7.12–7.01 (m, 5H), 4.41–4.27 (m, 1H), 2.71 (dd, *J* = 15.6, 3.7 Hz, 1H), 2.59 (dd, *J* = 15.6, 10.5 Hz, 1H), 2.20 (dd, *J* = 12.5, 6.6 Hz, 1H), 1.61 (dd, *J* = 12.5, 9.3 Hz, 1H), 1.43 (s, 3H), 1.41 (s, 3H).

<sup>13</sup>C NMR (75 MHz, CDCl<sub>3</sub>) δ 179.0, 170.1, 159.4, 156.1, 138.6, 129.9, 129.7, 128.9, 128.1, 124.1, 123.7, 119.7, 117.8, 63.9, 49.8, 48.7, 44.2, 27.2, 25.6.

HR-MS (ESI-TOF) calcd. for C<sub>26</sub>H<sub>26</sub>N<sub>2</sub>O<sub>2</sub> [M+H]<sup>+</sup>: 399.2072; found: 399.2073; [M+Na]<sup>+</sup>: 421.1886; found: 421.1891.

2-(4,4-Dimethyl-5-(4-(trifluoromethyl)phenyl)-3,4-dihydro-2H-pyrrol-2-yl)-N-phenylacetamide (**4e**)

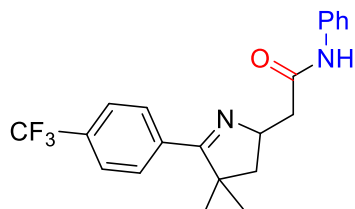

38.9 mg, yellow oil, yield: 52%. Eluent: pentane/ethyl acetate = 5/1 to 2/1.

<sup>1</sup>H NMR (300 MHz, CDCl<sub>3</sub>) δ 9.88 (br.s, 1H), 7.92–7.80 (m, 2H), 7.74–7.65 (m, 2H), 7.59–7.51 (m, 2H), 7.35–7.26 (m, 2H), 7.13–7.02 (m, 1H), 4.46–4.34 (m, 1H), 2.72 (dd, *J* = 15.5, 4.4 Hz, 1H), 2.63 (dd, *J* = 15.5, 9.9 Hz, 1H), 2.24 (dd, *J* = 12.6, 6.6 Hz, 1H), 1.64 (dd, *J* = 12.6, 9.3 Hz, 1H), 1.40 (s, 3H), 1.39 (s, 3H).

<sup>13</sup>C NMR (75 MHz, CDCl<sub>3</sub>) δ 179.4, 169.8, 138.4, 137.4, 131.86 (q, *J* = 32.6 Hz), 128.9, 128.2, 125.4 (q, *J* = 3.8 Hz), 123.8 (q, *J* = 272.7 Hz), 123.8, 119.7, 64.7, 50.3, 48.2, 44.0, 26.9, 25.4.

<sup>19</sup>F NMR (282 MHz, CDCl<sub>3</sub>) δ -62.9.

HR-MS (ESI-TOF) calcd. for C<sub>21</sub>H<sub>21</sub>F<sub>3</sub>N<sub>2</sub>O [M+H]<sup>+</sup>: 375.1684; found: 375.1683; [M+Na]<sup>+</sup>: 397.1498; found: 397.1503.

2-(4,4-Dimethyl-5-(*o*-tolyl)-3,4-dihydro-2H-pyrrol-2-yl)-N-phenylacetamide (**4f**)

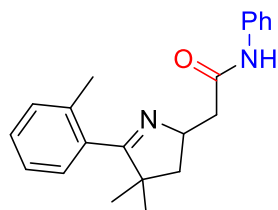

55.1 mg, yellow oil, yield: 86%. Eluent: pentane/ethyl acetate = 5/1 to 2/1.

<sup>1</sup>H NMR (300 MHz, CDCl<sub>3</sub>) δ 9.85 (br.s, 1H), 7.54–7.48 (m, 2H), 7.34–7.17 (m, 6H), 7.08–7.00 (m, 1H), 4.51–4.34 (m, 1H), 2.75 (dd, *J* = 15.4, 4.1 Hz, 1H), 2.65 (dd, *J* = 15.4, 9.8 Hz, 1H), 2.32 (s, 3H), 2.22 (dd, *J* = 12.7, 6.8 Hz, 1H), 1.64 (dd, *J* = 12.7, 9.0 Hz, 1H), 1.24 (s, 3H), 1.20 (s, 3H).

$^{13}\text{C}$  NMR (75 MHz,  $\text{CDCl}_3$ )  $\delta$  182.2, 170.0, 138.4, 136.2, 134.4, 130.7, 128.8, 128.5, 127.3, 125.0, 123.7, 119.8, 65.4, 52.3, 46.2, 44.3, 26.5, 25.0, 20.1.

**HR-MS** (ESI-TOF) calcd. for  $\text{C}_{21}\text{H}_{24}\text{N}_2\text{O}$   $[\text{M}+\text{H}]^+$ : 321.1967; found: 321.1963;  $[\text{M}+\text{Na}]^+$ : 343.1781; found: 343.1785.

2-(4,4-Dimethyl-5-(*m*-tolyl)-3,4-dihydro-2*H*-pyrrol-2-yl)-*N*-phenylacetamide (**4g**)

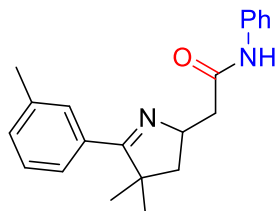

50.0 mg, yellow oil, yield: 78%. Eluent: pentane/ethyl acetate = 5/1 to 2/1.

$^1\text{H}$  NMR (300 MHz,  $\text{CDCl}_3$ )  $\delta$  10.24 (br.s, 1H), 7.65–7.52 (m, 4H), 7.36–7.25 (m, 4H), 7.11–7.03 (m, 1H), 4.41–4.29 (m, 1H), 2.72 (dd,  $J$  = 15.5, 3.9 Hz, 1H), 2.61 (dd,  $J$  = 15.5, 10.2 Hz, 1H), 2.42 (s, 3H), 2.20 (dd,  $J$  = 12.6, 6.6 Hz, 1H), 1.60 (dd,  $J$  = 12.6, 9.3 Hz, 1H), 1.41 (s, 3H), 1.40 (s, 3H).

$^{13}\text{C}$  NMR (75 MHz,  $\text{CDCl}_3$ )  $\delta$  180.3, 170.1, 138.6, 138.0, 133.8, 130.8, 128.8, 128.6, 128.2, 124.9, 123.6, 119.7, 64.1, 50.1, 48.4, 44.2, 27.1, 25.6, 21.5.

**HR-MS** (ESI-TOF) calcd. for  $\text{C}_{21}\text{H}_{24}\text{N}_2\text{O}$   $[\text{M}+\text{H}]^+$ : 321.1967; found: 321.1960;  $[\text{M}+\text{Na}]^+$ : 343.1781; found: 343.1778.

2-(5-(Furan-2-yl)-4,4-dimethyl-3,4-dihydro-2*H*-pyrrol-2-yl)-*N*-phenylacetamide (**4h**)

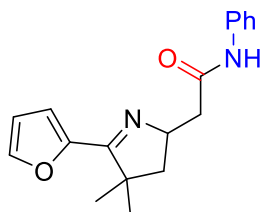

53.3 mg, yellow oil, yield: 90%. Eluent: pentane/ethyl acetate = 5/1 to 2/1.

$^1\text{H}$  NMR (300 MHz,  $\text{CDCl}_3$ )  $\delta$  9.86 (br.s, 1H), 7.63–7.53 (m, 3H), 7.33–7.25 (m, 2H), 7.09–7.02 (m, 1H), 7.01 (dt,  $J$  = 3.5, 0.7 Hz, 1H), 6.50 (dd,  $J$  = 3.5, 1.8 Hz, 1H), 4.49–4.36 (m, 1H), 2.74 (dd,  $J$  = 15.1, 4.8 Hz, 1H), 2.67 (dd,  $J$  = 15.1, 8.3 Hz, 1H), 2.17 (dd,  $J$  = 12.8, 7.1 Hz, 1H), 1.62 (dd,  $J$  = 12.8, 8.7 Hz, 1H), 1.44 (s, 3H), 1.34 (s, 3H).

$^{13}\text{C}$  NMR (75 MHz,  $\text{CDCl}_3$ )  $\delta$  170.7, 169.8, 148.6, 144.5, 138.5, 128.8, 123.6, 119.7, 113.6, 111.6, 65.3, 49.9, 46.6, 44.1, 27.1, 25.5.

**HR-MS** (ESI-TOF) calcd. for  $\text{C}_{18}\text{H}_{20}\text{N}_2\text{O}_2$   $[\text{M}+\text{H}]^+$ : 297.1603; found: 297.1598;  $[\text{M}+\text{Na}]^+$ : 319.1417; found: 319.1420.

2-(4,4-Dimethyl-5-(thiophen-2-yl)-3,4-dihydro-2*H*-pyrrol-2-yl)-*N*-phenylacetamide (**4i**)

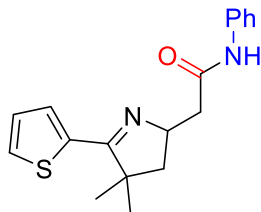

38.1 mg, yellow oil, yield: 61%. Eluent: pentane/ethyl acetate = 5/1 to 2/1.

$^1\text{H}$  NMR (300 MHz,  $\text{CDCl}_3$ )  $\delta$  10.24 (br.s, 1H), 7.71–7.59 (m, 2H), 7.57–7.53 (m, 1H), 7.46 (dd,  $J$  = 5.1, 1.0 Hz, 1H), 7.38–7.28 (m, 2H), 7.11 (dd,  $J$  = 5.1, 3.7 Hz, 1H), 7.11–7.03 (m, 1H), 4.40–4.29 (m, 1H), 2.72 (dd,  $J$

= 15.4, 3.8 Hz, 1H), 2.59 (dd,  $J = 15.4, 10.4$  Hz, 1H), 2.22 (dd,  $J = 12.7, 7.0$  Hz, 1H), 1.64 (dd,  $J = 12.7, 8.8$  Hz, 1H), 1.51 (s, 3H), 1.40 (s, 3H).

$^{13}\text{C}$  NMR (75 MHz,  $\text{CDCl}_3$ )  $\delta$  174.1, 169.9, 138.6, 137.4, 129.4, 128.8, 128.5, 127.8, 123.6, 119.6, 64.4, 50.0, 47.9, 44.2, 27.5, 25.8.

**HR-MS** (ESI-TOF) calcd. for  $\text{C}_{18}\text{H}_{20}\text{N}_2\text{OS}$   $[\text{M}+\text{H}]^+$ : 313.1375; found: 313.1366;  $[\text{M}+\text{Na}]^+$ : 335.1188; found: 335.1189.

2-(4,4-Dimethyl-5-(naphthalen-1-yl)-3,4-dihydro-2H-pyrrol-2-yl)-N-phenylacetamide (**4j**)

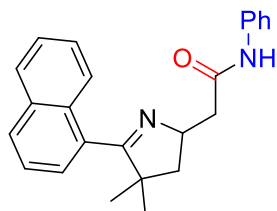

58.4 mg, yellow oil, yield: 82%. Eluent: pentane/ethylacetate = 5/1 to 2/1.

$^1\text{H}$  NMR (300 MHz,  $\text{CDCl}_3$ )  $\delta$  9.66 (br.s, 1H), 7.94–7.86 (m, 3H), 7.53–7.47 (m, 2H), 7.46–7.36 (m, 4H), 7.25–7.17 (m, 2H), 7.06–6.97 (m, 1H), 4.63–4.52 (m, 1H), 2.87 (dd,  $J = 15.3, 4.2$  Hz, 1H), 2.77 (dd,  $J = 15.3, 9.3$  Hz, 1H), 2.31 (dd,  $J = 12.7, 6.7$  Hz, 1H), 1.79 (dd,  $J = 12.7, 9.2$  Hz, 1H), 1.27 (s, 3H), 1.20 (s, 3H).

$^{13}\text{C}$  NMR (75 MHz,  $\text{CDCl}_3$ )  $\delta$  181.8, 169.9, 138.4, 133.7, 132.5, 131.7, 129.1, 128.7, 128.3, 126.5, 126.1, 125.4, 125.0, 124.5, 123.7, 119.8, 65.8, 52.7, 46.1, 44.2, 26.6, 25.0.

**HR-MS** (ESI-TOF) calcd. for  $\text{C}_{24}\text{H}_{24}\text{N}_2\text{O}$   $[\text{M}+\text{H}]^+$ : 357.1967; found: 357.1972;  $[\text{M}+\text{Na}]^+$ : 379.1781; found: 379.1790.

2-(4,4-Dimethyl-5-(naphthalen-2-yl)-3,4-dihydro-2H-pyrrol-2-yl)-N-phenylacetamide (**4k**)

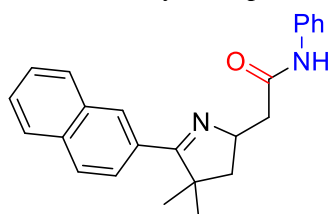

67.7 mg, yellow oil, yield: 95%. Eluent: pentane/ethylacetate = 5/1 to 2/1.

$^1\text{H}$  NMR (300 MHz,  $\text{CDCl}_3$ )  $\delta$  10.23 (br.s, 1H), 8.16 (s, 1H), 7.91–7.76 (m, 4H), 7.56–7.40 (m, 4H), 7.28–7.18 (m, 2H), 7.05–6.93 (m, 1H), 4.39–4.25 (m, 1H), 2.67 (dd,  $J = 15.6, 3.9$  Hz, 1H), 2.56 (dd,  $J = 15.6, 10.3$  Hz, 1H), 2.16 (dd,  $J = 12.6, 6.6$  Hz, 1H), 1.57 (dd,  $J = 12.6, 9.3$  Hz, 1H), 1.42 (s, 3H), 1.41 (s, 3H).

$^{13}\text{C}$  NMR (75 MHz,  $\text{CDCl}_3$ )  $\delta$  179.9, 170.1, 138.6, 134.0, 132.7, 131.0, 128.9, 128.7, 128.1, 127.8, 127.7, 127.2, 126.5, 125.3, 123.7, 119.7, 64.2, 50.1, 48.6, 44.2, 27.3, 25.7.

**HR-MS** (ESI-TOF) calcd. for  $\text{C}_{24}\text{H}_{24}\text{N}_2\text{O}$   $[\text{M}+\text{H}]^+$ : 357.1967; found: 357.1969;  $[\text{M}+\text{Na}]^+$ : 379.1781; found: 379.1786.

2-(5-(Benzo[d][1,3]dioxol-5-yl)-4,4-dimethyl-3,4-dihydro-2H-pyrrol-2-yl)-N-phenylacetamide (**4l**)

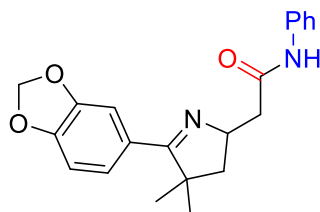

65.2 mg, yellow oil, yield: 93%. Eluent: pentane/ethylacetate = 5/1 to 2/1.



**<sup>1</sup>H NMR** (300 MHz, CDCl<sub>3</sub>) δ 10.22 (br.s, 1H), 7.64–7.54 (m, 2H), 7.36–7.27 (m, 4H), 7.10–7.03 (m, 1H), 6.85 (d, *J* = 8.6 Hz, 1H), 6.01 (s, 2H), 4.37–4.24 (m, 1H), 2.68 (dd, *J* = 15.6, 4.0 Hz, 1H), 2.58 (dd, *J* = 15.6, 10.2 Hz, 1H), 2.17 (dd, *J* = 12.5, 6.6 Hz, 1H), 1.58 (dd, *J* = 12.5, 9.3 Hz, 1H), 1.40 (s, 3H), 1.38 (s, 3H).

**<sup>13</sup>C NMR** (75 MHz, CDCl<sub>3</sub>) δ 178.9, 170.1, 149.3, 147.8, 138.5, 128.8, 127.7, 123.6, 122.4, 119.7, 108.2, 107.9, 101.4, 63.7, 49.8, 48.8, 44.1, 27.2, 25.6.

**HR-MS** (ESI-TOF) calcd. for C<sub>21</sub>H<sub>22</sub>N<sub>2</sub>O<sub>3</sub> [M+H]<sup>+</sup>: 351.1709; found: 351.1704; [M+Na]<sup>+</sup>: 373.1523; found: 373.1521.

2-(5-(3,4-Dimethoxyphenyl)-4,4-dimethyl-3,4-dihydro-2H-pyrrol-2-yl)-N-phenylacetamide (**4m**)

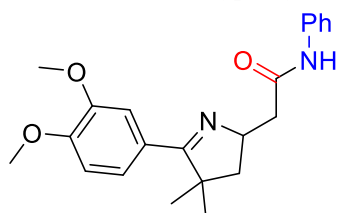

63.0 mg, yellow oil, yield: 86%. Eluent: pentane/ethyl acetate = 5/1 to 1/1.

**<sup>1</sup>H NMR** (300 MHz, CDCl<sub>3</sub>) δ 10.38 (br.s, 1H), 7.63–7.53 (m, 2H), 7.46 (d, *J* = 2.0 Hz, 1H), 7.40 (dd, *J* = 8.4, 2.0 Hz, 1H), 7.33–7.23 (m, 2H), 7.10–6.99 (m, 1H), 6.88 (d, *J* = 8.4 Hz, 1H), 4.38–4.25 (m, 1H), 3.92 (s, 3H), 3.90 (s, 3H), 2.70 (dd, *J* = 15.5, 4.0 Hz, 1H), 2.58 (dd, *J* = 15.5, 10.2 Hz, 1H), 2.18 (dd, *J* = 12.6, 6.6 Hz, 1H), 1.60 (dd, *J* = 12.6, 9.2 Hz, 1H), 1.44 (s, 3H), 1.40 (s, 3H).

**<sup>13</sup>C NMR** (75 MHz, CDCl<sub>3</sub>) <sup>13</sup>C NMR (75 MHz, CDCl<sub>3</sub>) δ 178.9, 170.1, 150.9, 148.8, 138.6, 128.8, 126.1, 123.6, 121.1, 119.5, 111.0, 110.3, 63.6, 55.9, 55.8, 49.8, 48.7, 44.1, 27.4, 25.7.

**HR-MS** (ESI-TOF) calcd. for C<sub>22</sub>H<sub>26</sub>N<sub>2</sub>O<sub>3</sub> [M+H]<sup>+</sup>: 367.2021; found: 367.2013; [M+Na]<sup>+</sup>: 389.1835; found: 389.1832.

2-(5-(3,4-Dichlorophenyl)-4,4-dimethyl-3,4-dihydro-2H-pyrrol-2-yl)-N-phenylacetamide (**4n**)

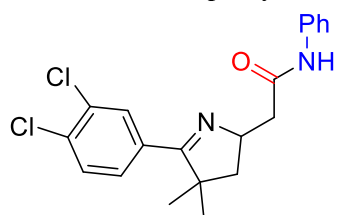

31.5 mg, yellow oil, yield: 42%. Eluent: pentane/ethyl acetate = 5/1 to 2/1.

**<sup>1</sup>H NMR** (300 MHz, CDCl<sub>3</sub>) δ 9.78 (br.s, 1H), 7.88 (d, *J* = 2.0 Hz, 1H), 7.61 (dd, *J* = 8.4, 2.0 Hz, 1H), 7.58–7.52 (m, 2H), 7.51 (d, *J* = 8.4 Hz, 1H), 7.35–7.28 (m, 2H), 7.12–7.03 (m, 1H), 4.42–4.31 (m, 1H), 2.70 (dd, *J* = 15.5, 4.3 Hz, 1H), 2.61 (dd, *J* = 15.5, 9.9 Hz, 1H), 2.22 (dd, *J* = 12.7, 6.6 Hz, 1H), 1.62 (dd, *J* = 12.7, 9.3 Hz, 1H), 1.38 (s, 6H).

**<sup>13</sup>C NMR** (75 MHz, CDCl<sub>3</sub>) δ 178.2, 169.7, 138.4, 134.5, 133.7, 132.8, 130.4, 129.9, 128.9, 127.0, 123.9, 119.7, 64.5, 50.1, 48.3, 44.0, 27.0, 25.4.

**HR-MS** (ESI-TOF) calcd. for C<sub>20</sub>H<sub>20</sub>Cl<sub>2</sub>N<sub>2</sub>O [M+H]<sup>+</sup>: 375.1031; found: 375.1029; [M+Na]<sup>+</sup>: 397.0845; found: 397.0851.

(*E*)-2-(4,4-Dimethyl-5-(1-phenylprop-1-en-2-yl)-3,4-dihydro-2H-pyrrol-2-yl)-N-phenylacetamide (**4o**)

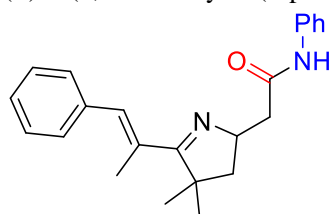

35.3 mg, yellow oil, yield: 51%. Eluent: pentane/ethyl acetate = 5/1 to 2/1.

**<sup>1</sup>H NMR** (300 MHz, CDCl<sub>3</sub>) δ 10.53 (br.s, 1H), 7.63 – 7.56 (m, 2H), 7.43 – 7.35 (m, 4H), 7.34 – 7.28 (m, 3H), 7.20 (s, 1H), 7.10 – 7.03 (m, 1H), 4.29 – 4.16 (m, 1H), 2.70 (dd, *J* = 15.5, 3.4 Hz, 1H), 2.53 (dd, *J* = 15.5, 10.9 Hz, 1H), 2.24 (d, *J* = 1.3 Hz, 3H), 2.14 (dd, *J* = 12.6, 6.6 Hz, 1H), 1.57 (dd, *J* = 12.6, 9.5 Hz, 1H), 1.49 (s, 3H), 1.41 (s, 3H).

**<sup>13</sup>C NMR** (75 MHz, CDCl<sub>3</sub>) δ 181.4, 170.2, 138.7, 136.7, 134.4, 132.0, 129.3, 128.9, 128.3, 127.6, 123.5, 119.5, 63.2, 49.6, 49.4, 44.2, 27.8, 26.1, 16.6.

**HR-MS** (ESI-TOF) calcd. for C<sub>23</sub>H<sub>26</sub>N<sub>2</sub>O [M+H]<sup>+</sup>: 347.2123; found: 347.2119; [M+Na]<sup>+</sup>: 369.1937; found: 369.1940.

*N*-Phenyl-2-(1-phenyl-2-azaspiro[4.5]dec-1-en-3-yl)acetamide (**4p**)

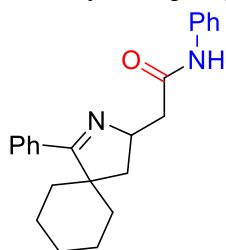

64.4 mg, yellow oil, yield: 93%. Eluent: pentane/ethyl acetate = 5/1 to 2/1.

**<sup>1</sup>H NMR** (300 MHz, CDCl<sub>3</sub>) δ 10.12 (br.s, 1H), 7.72 – 7.63 (m, 2H), 7.62 – 7.55 (m, 2H), 7.48 – 7.41 (m, 3H), 7.35 – 7.27 (m, 2H), 7.12 – 7.04 (m, 1H), 4.45 – 4.32 (m, 1H), 2.77 (dd, *J* = 15.4, 4.2 Hz, 1H), 2.66 (dd, *J* = 15.4, 9.8 Hz, 1H), 2.54 (dd, *J* = 12.8, 7.0 Hz, 1H), 1.92 (td, *J* = 12.9, 3.7 Hz, 1H), 1.83 – 1.61 (m, 5H), 1.55 – 1.42 (m, 3H), 1.36 – 1.20 (m, 2H).

**<sup>13</sup>C NMR** (75 MHz, CDCl<sub>3</sub>) δ 181.0, 170.0, 138.5, 134.8, 129.5, 128.8, 128.1, 128.0, 123.6, 119.7, 64.9, 56.1, 44.4, 41.4, 35.6, 31.3, 25.4, 23.2, 23.0.

**HR-MS** (ESI-TOF) calcd. for C<sub>23</sub>H<sub>26</sub>N<sub>2</sub>O [M+H]<sup>+</sup>: 347.2123; found: 347.2121; [M+Na]<sup>+</sup>: 369.1937; found: 369.1937.

2-(4-Allyl-4-methyl-5-phenyl-3,4-dihydro-2*H*-pyrrol-2-yl)-*N*-phenylacetamide (**4q**)

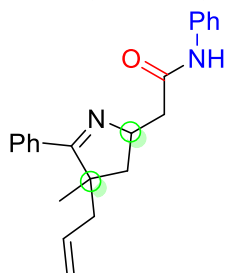

53.2 mg, yellow oil, dr = 3:1, yield: 80%. Eluent: pentane/ethyl acetate = 5/1 to 2/1.

**<sup>1</sup>H NMR** (400 MHz, CDCl<sub>3</sub>) δ 10.1 (br.s, 1H), 7.87 – 7.73 (m, 2H), 7.62 – 7.54 (m, 2H), 7.50 – 7.40 (m, 3H), 7.35 – 7.27 (m, 2H), 7.11 – 7.02 (m, 1H), 5.80 – 5.69 (m, 1H), 5.17 – 5.07 (m, 2H), 4.36 – 4.28 (m, 1H), 2.72 (dd, *J* = 15.5, 3.7 Hz, 1H), 2.60 (dd, *J* = 15.5, 10.3 Hz, 1H), 2.51 (dd, *J* = 13.9, 6.7 Hz, 1H), 2.42 (dd, *J* = 13.0, 7.3 Hz, 1H), 2.39 (dd, *J* = 13.9, 8.0 Hz, 1H), 1.54 (dd, *J* = 13.0, 8.6 Hz, 1H), 1.41 (s, 3H).

**<sup>13</sup>C NMR** (101 MHz, CDCl<sub>3</sub>) δ 178.8, 170.0, 138.5, 133.9, 133.4, 130.1, 128.8, 128.4, 128.0, 127.8, 123.7, 119.7, 65.0, 54.3, 44.5, 44.4, 43.4, 26.3.

**HR-MS** (ESI-TOF) calcd. for C<sub>22</sub>H<sub>24</sub>N<sub>2</sub>O [M+H]<sup>+</sup>: 333.1967; found: 333.1964.

2-(4-Allyl-4-ethyl-5-phenyl-3,4-dihydro-2H-pyrrol-2-yl)-N-phenylacetamide (**4r**)

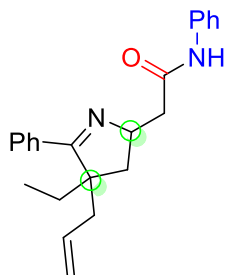

47.1 mg, yellow oil, dr = 10:3, yield: 68%. Eluent: pentane/ethyl acetate = 5/1 to 2/1.

**<sup>1</sup>H NMR** (300 MHz, CDCl<sub>3</sub>) δ 10.24 (br.s, 1H), 7.88–7.70 (m, 2H), 7.66–7.52 (m, 2H), 7.51–7.40 (m, 3H), 7.35–7.27 (m, 2H), 7.12–7.02 (m, 1H), 5.80–5.64 (m, 1H), 5.16–5.04 (m, 2H), 4.43–4.23 (m, 1H), 2.71 (dd, *J* = 15.5, 3.8 Hz, 1H), 2.64–2.51 (m, 2H), 2.43 (dd, *J* = 14.0, 8.4 Hz, 1H), 2.24 (dd, *J* = 13.2, 7.7 Hz, 1H), 1.86 (dd, *J* = 14.0, 7.3 Hz, 1H), 1.81–1.63 (m, 2H), 0.82 (t, *J* = 7.4 Hz, 3H).

**<sup>13</sup>C NMR** (75 MHz, CDCl<sub>3</sub>) δ 177.0, 170.0, 138.6, 134.4, 133.5, 130.2, 128.8, 128.5, 127.8, 123.6, 119.7, 118.6, 65.2, 59.4, 44.6, 43.5, 40.6, 30.9, 9.1.

**HR-MS** (ESI-TOF) calcd. for C<sub>23</sub>H<sub>26</sub>N<sub>2</sub>O [M+H]<sup>+</sup>: 347.2123; found: 347.2128, [M+H]<sup>+</sup>: 369.1937; found: 369.1945.

2-(4-Allyl-4,5-diphenyl-3,4-dihydro-2H-pyrrol-2-yl)-N-phenylacetamide (**4s**)

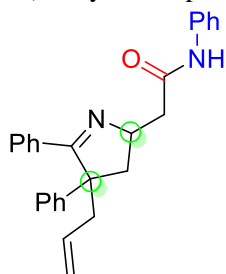

41.0 mg, yellow oil, dr = 20:9, yield: 52%. Eluent: pentane/ethyl acetate = 5/1 to 2/1.

**<sup>1</sup>H NMR** (400 MHz, CDCl<sub>3</sub>) δ 10.24 (br.s, 1H), 7.68–7.62 (m, 2H), 7.61–7.55 (m, 2H), 7.39–7.23 (m, 10H), 7.14–7.09 (m, 1H), 5.73–5.60 (m, 1H), 5.17–5.07 (m, 2H), 4.47–4.39 (m, 1H), 3.04–2.87 (m, 2H), 2.75–2.63 (m, 3H), 1.92 (dd, *J* = 13.6, 7.8 Hz, 1H).

**<sup>13</sup>C NMR** (101 MHz, CDCl<sub>3</sub>) δ 174.7, 169.8, 146.6, 138.5, 133.4, 132.9, 130.5, 129.0, 129.0, 128.3, 126.8, 126.1, 123.8, 119.7, 119.5, 66.8, 61.6, 49.0, 45.0, 40.6.

**HR-MS** (ESI-TOF) calcd. for C<sub>27</sub>H<sub>26</sub>N<sub>2</sub>O [M+H]<sup>+</sup>: 395.2123; found: 395.2122, [M+H]<sup>+</sup>: 417.1937; found: 417.1947.

2-(4-Allyl-4-methyl-5-(*m*-tolyl)-3,4-dihydro-2H-pyrrol-2-yl)-N-phenylacetamide (**4t**)

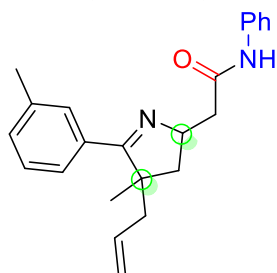

52.6 mg, yellow oil, dr = 20:7, yield: 76%. Eluent: pentane/ethyl acetate = 5/1 to 2/1.

**<sup>1</sup>H NMR** (300 MHz, CDCl<sub>3</sub>) δ 10.16 (s, 1H), 7.66–7.52 (m, 4H), 7.36–7.26 (m, 4H), 7.12–7.02 (m, 1H), 5.83–5.67 (m, 1H), 5.17–5.06 (m, 2H), 4.45–4.24 (m, 1H), 2.71 (dd, *J* = 15.5, 4.0 Hz, 1H), 2.58 (dd, *J* = 15.5, 4.0 Hz, 1H), 2.54–2.46 (m, 1H), 2.45–2.34 (m, 2H), 2.42 (s, 3H), 1.51 (dd, *J* = 13.0, 8.7 Hz, 1H), 1.40 (s, 3H).

$^{13}\text{C}$  NMR (75 MHz,  $\text{CDCl}_3$ )  $\delta$  178.8, 170.0, 138.6, 138.1, 134.0, 133.6, 130.9, 128.8, 128.7, 128.3, 125.0, 123.6, 119.7, 118.7, 64.9, 54.3, 44.6, 44.5, 43.4, 26.3, 21.5.

**HR-MS** (ESI-TOF) calcd. for  $\text{C}_{23}\text{H}_{26}\text{N}_2\text{O}$   $[\text{M}+\text{H}]^+$ : 347.2123; found: 347.2119;  $[\text{M}+\text{Na}]^+$ : 369.1937; found: 369.1942.

2-(4,4-Dimethyl-5-phenyl-3,4-dihydro-2H-pyrrol-2-yl)-*N*-phenylpropanamide (**4u**)

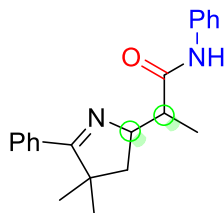

59.6 mg, yellow oil, dr = 10:3, yield: 93%. Eluent: pentane/ethyl acetate = 5/1 to 2/1.

$^1\text{H}$  NMR (400 MHz,  $\text{CDCl}_3$ )  $\delta$  10.72 (br.s, 1H), 7.83 – 7.77 (m, 2H), 7.63 – 7.56 (m, 2H), 7.50 – 7.42 (m, 3H), 7.32 – 7.27 (m, 2H), 7.08 – 7.01 (m, 1H), 4.11 – 4.03 (m, 1H), 2.53 – 2.44 (m, 1H), 2.18 (dd,  $J$  = 12.4, 6.1 Hz, 1H), 1.68 (dd,  $J$  = 12.4, 10.0 Hz, 1H), 1.41 (s, 6H), 1.30 (d,  $J$  = 7.0 Hz, 3H).

$^{13}\text{C}$  NMR (101 MHz,  $\text{CDCl}_3$ )  $\delta$  179.9, 172.9, 138.9, 133.8, 130.2, 128.8, 128.4, 127.9, 123.4, 119.6, 69.6, 49.7, 48.2, 46.1, 26.8, 25.1, 13.2.

**HR-MS** (ESI-TOF) calcd. for  $\text{C}_{21}\text{H}_{24}\text{N}_2\text{O}$   $[\text{M}+\text{H}]^+$ : 321.1967; found: 321.1968;  $[\text{M}+\text{Na}]^+$ : 343.1781; found: 343.1789.

2-(4,4-Dimethyl-5-phenyl-3,4-dihydro-2H-pyrrol-2-yl)-2-methyl-*N*-phenylpropanamide (**4v**)

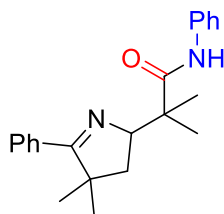

28.1 mg, yellow oil, yield: 42%. Eluent: pentane/ethyl acetate = 5/1 to 2/1.

$^1\text{H}$  NMR (300 MHz,  $\text{CDCl}_3$ )  $\delta$  10.73 (br.s, 1H), 7.91 – 7.81 (m, 2H), 7.63 – 7.56 (m, 2H), 7.55 – 7.46 (m, 3H), 7.35 – 7.27 (m, 2H), 7.12 – 7.03 (m, 1H), 4.20 (dd,  $J$  = 10.3, 6.5 Hz, 1H), 2.02 (dd,  $J$  = 12.6, 6.5 Hz, 1H), 1.79 (dd,  $J$  = 12.6, 10.3 Hz, 1H), 1.46 (s, 3H), 1.42 (s, 3H), 1.35 (s, 3H), 1.21 (s, 3H).

$^{13}\text{C}$  NMR (75 MHz,  $\text{CDCl}_3$ )  $\delta$  180.2, 176.1, 139.1, 133.8, 130.2, 128.8, 128.4, 127.8, 123.3, 119.6, 72.3, 49.8, 45.3, 43.9, 26.8, 25.4, 22.8, 20.7.

**HR-MS** (ESI-TOF) calcd. for  $\text{C}_{22}\text{H}_{26}\text{N}_2\text{O}$   $[\text{M}+\text{H}]^+$ : 335.2123; found: 335.2120;  $[\text{M}+\text{Na}]^+$ : 357.1937; found: 357.1942.

2-(4,4-Dimethyl-5-phenyl-3,4-dihydro-2H-pyrrol-2-yl)-2-methyl-*N*-phenylpropanamide (**4v'**)<sup>[6]</sup>

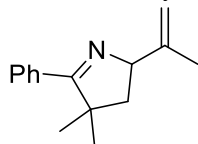

29.4 mg, yellow oil, yield: 46%. Eluent: pentane/ethyl acetate = 5/1.

$^1\text{H}$  NMR (300 MHz,  $\text{CDCl}_3$ )  $\delta$  7.81 – 7.71 (m, 2H), 7.41 – 7.34 (m, 3H), 5.06 – 5.01 (m, 1H), 4.88 – 4.85 (m, 1H), 4.53 (t,  $J$  = 8.1, 1H), 2.14 (dd,  $J$  = 12.4, 7.2 Hz, 1H), 1.82 (s, 3H), 1.75 (dd,  $J$  = 12.4, 9.0 Hz, 1H), 1.39 (s, 3H), 1.35 (s, 3H).

$^{13}\text{C}$  NMR (75 MHz,  $\text{CDCl}_3$ )  $\delta$  179.6, 146.9, 134.6, 129.4, 128.0, 127.9, 110.0, 72.2, 50.3, 47.2, 27.0, 25.8, 19.8.

#### 4. Reference

- [1] Liu, R.-H.; Wei, D.; Han, B.; Yu, W. *ACS Catal.* **2016**, *6*, 6525-6530.
- [2] Wang, L.; Wang C. *J. Org. Chem.* **2019**, *84*, 6547-6556.
- [3] Zhang, M.; Liu, S.; Li, H.; Guo, Y.; Li, N.; Guan, M.; Mehfooz, H.; Zhao, J.; Zhang, Q. *Chem. Eur. J.* **2019**, *25*, 12620-12627.
- [4] Cai, S.-H.; Xie, J.-H.; Song, S.; Ye, L.; Feng, C.; Loh, T.-P. *ACS Catal.* **2016**, *6*, 5571-5574.
- [5] Zhang, Y.; Yin, Y.; Wang H.; Wu, X.-F. *Chem. Commun.* **2020**, *56*, 7045-7048.
- [6] Du, W.; Zhao, M.-N.; Ren, Z.-H.; Wang, Y.-Y.; Guan, Z.-H. *Chem. Commun.* **2014**, *50*, 7437-7439.

## 5. <sup>1</sup>H-, <sup>13</sup>C- and <sup>19</sup>F-NMR spectra copy of products

200415.f316.10.fid — Youcan Zhang YZhang-3-22 — PROTON CDCl<sub>3</sub> {C:\Bruker\TopSpin3.6.0} 2004 16 — 300.20MHz

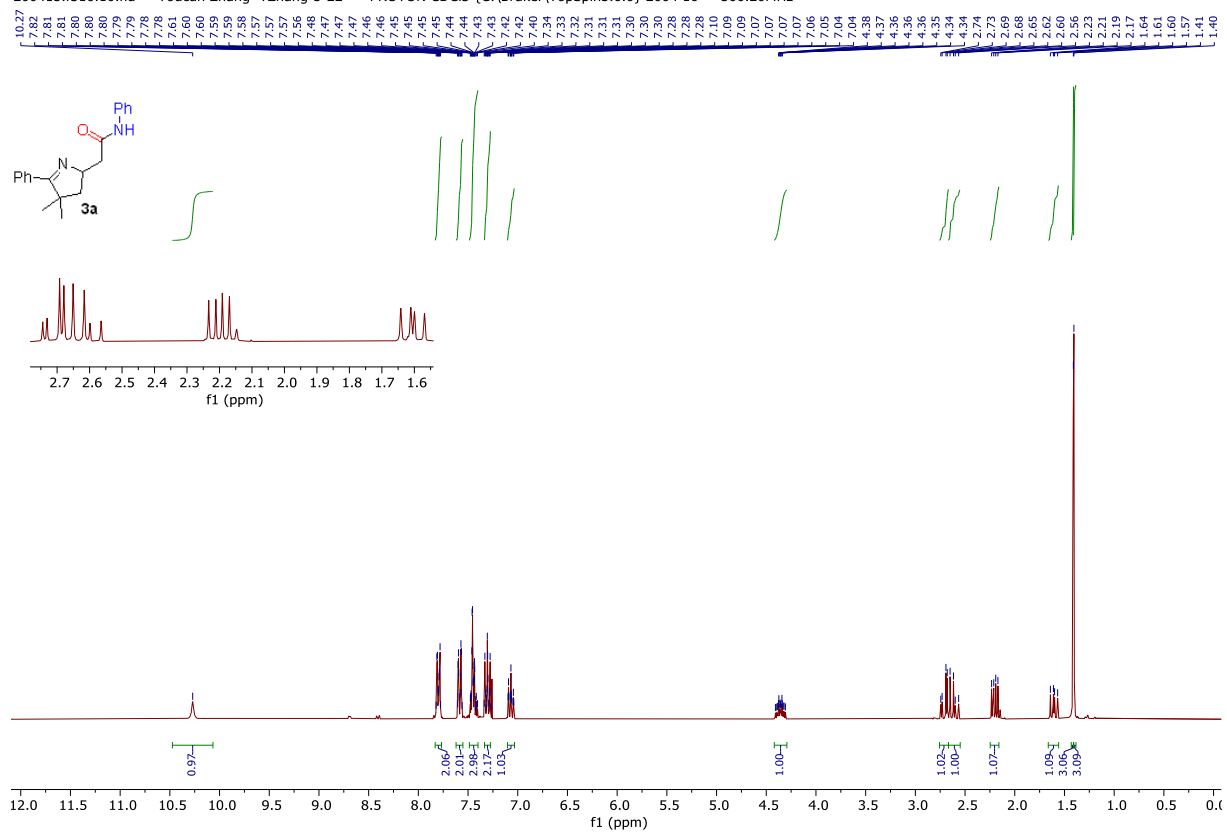

200415.f316.11.fid — Youcan Zhang YZhang-3-22 — C13CPD CDCl<sub>3</sub> {C:\Bruker\TopSpin3.6.0} 2004 16 — 75.49MHz

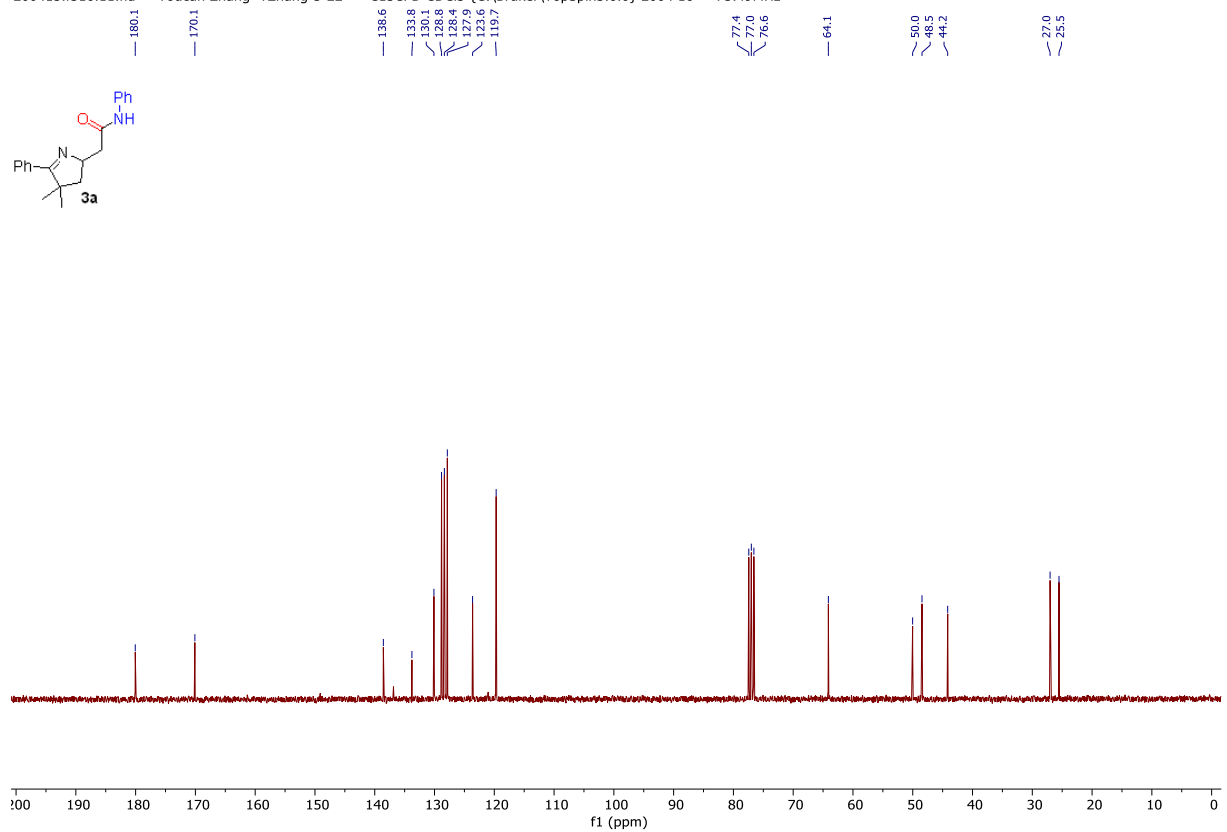

200414.423.10.fid — Youcan Zhang YZhang-3-48 — Au1H CDCl3 {C:\Bruker\TopSpin3.5pl6} 2004 23 — 400.13MHz

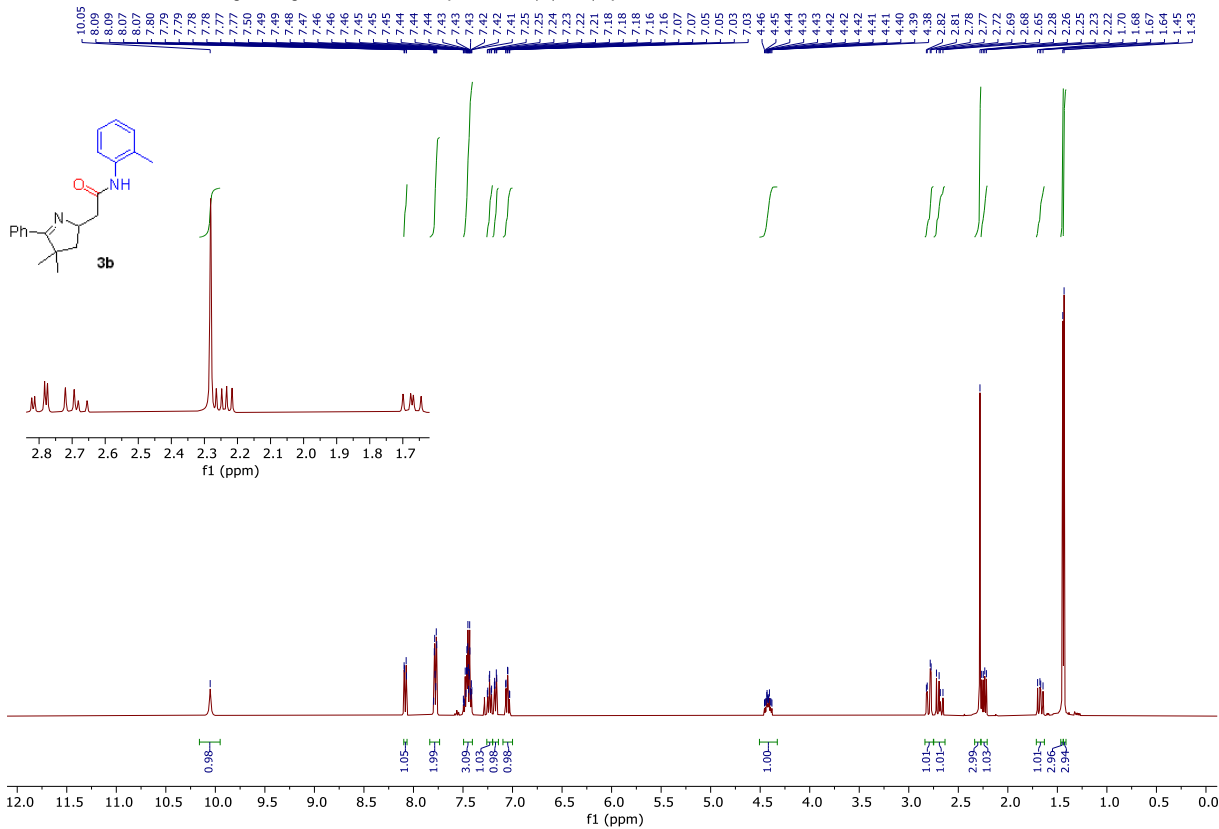

200414.423.11.fid — Youcan Zhang YZhang-3-48 — Au13C CDCl3 {C:\Bruker\TopSpin3.5pl6} 2004 23 — 100.63MHz

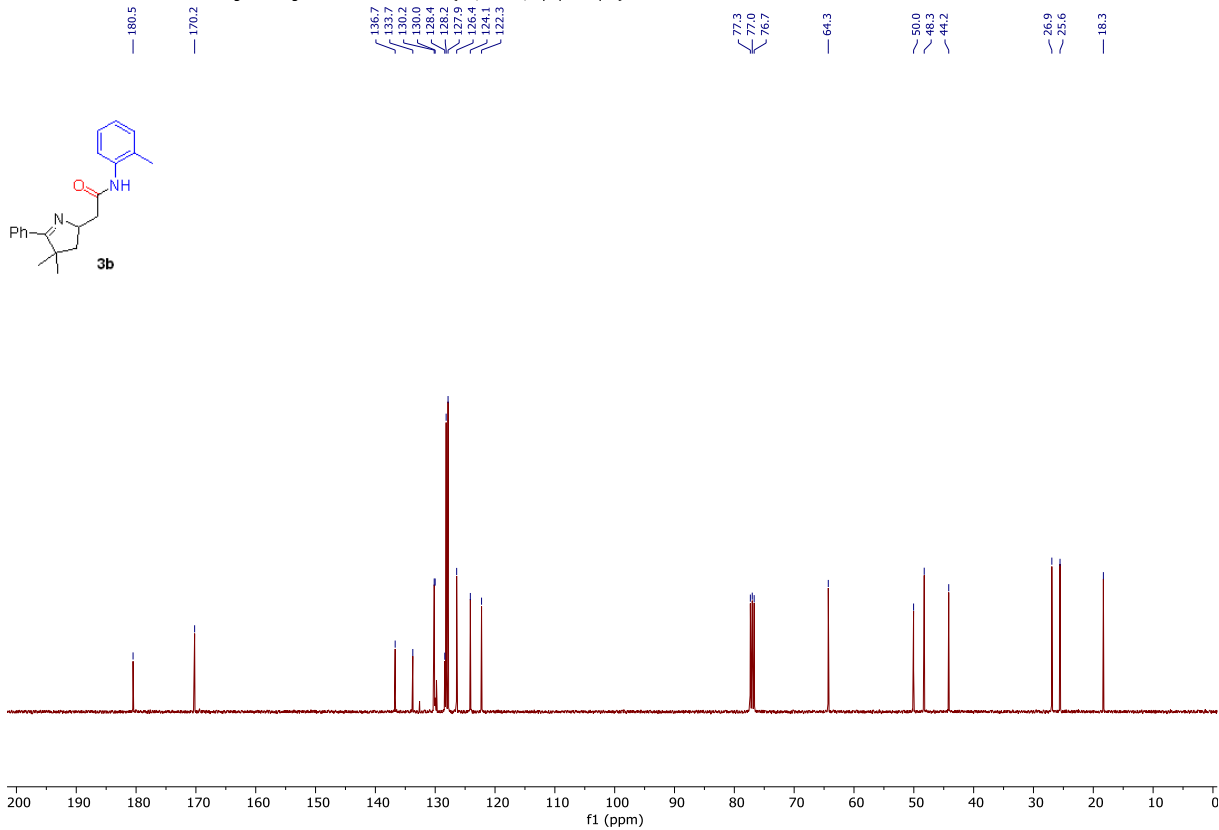

200417.f331.10.fid — Youcan Zhang YZhang-3-50 — PROTON CDCl3 {C:\Bruker\TopSpin3.6.0} 2004 31 — 300.20MHz

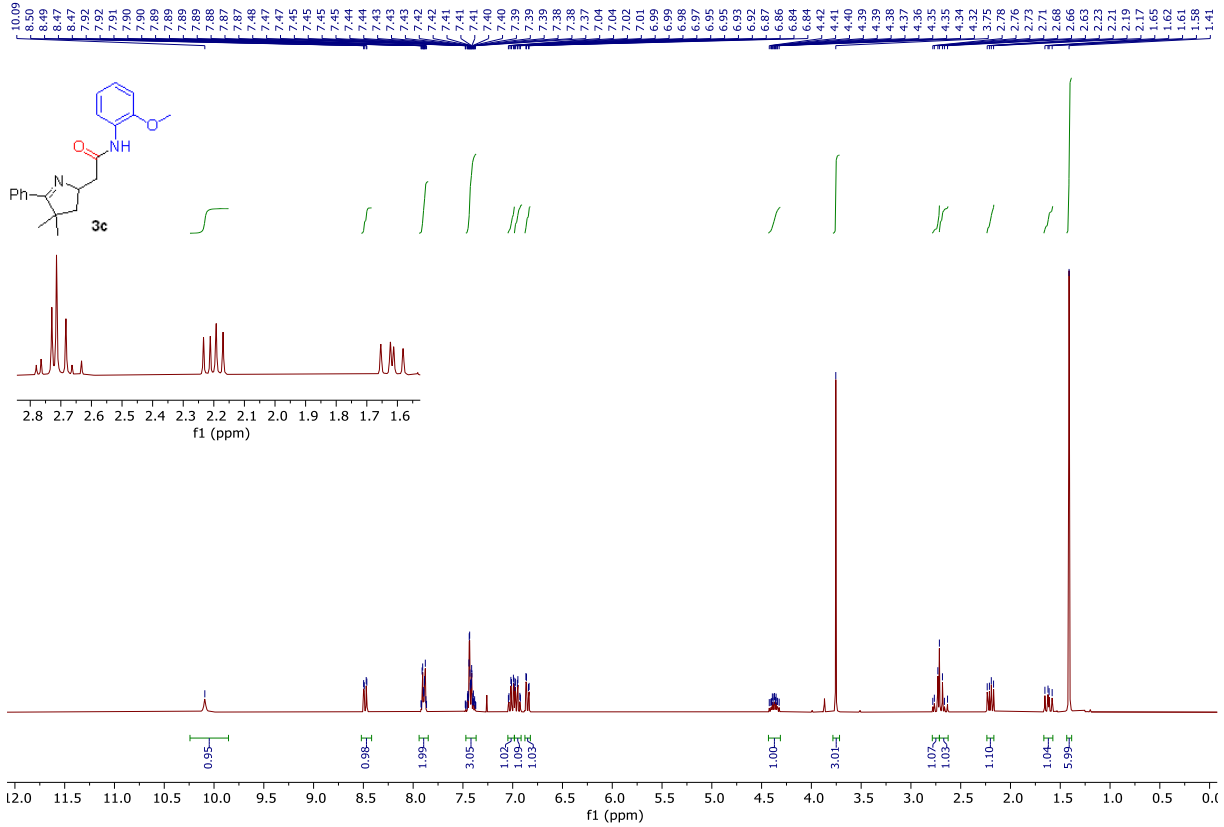

200417.f331.11.fid — Youcan Zhang YZhang-3-50 — C13CPD CDCl3 {C:\Bruker\TopSpin3.6.0} 2004 31 — 75.49MHz

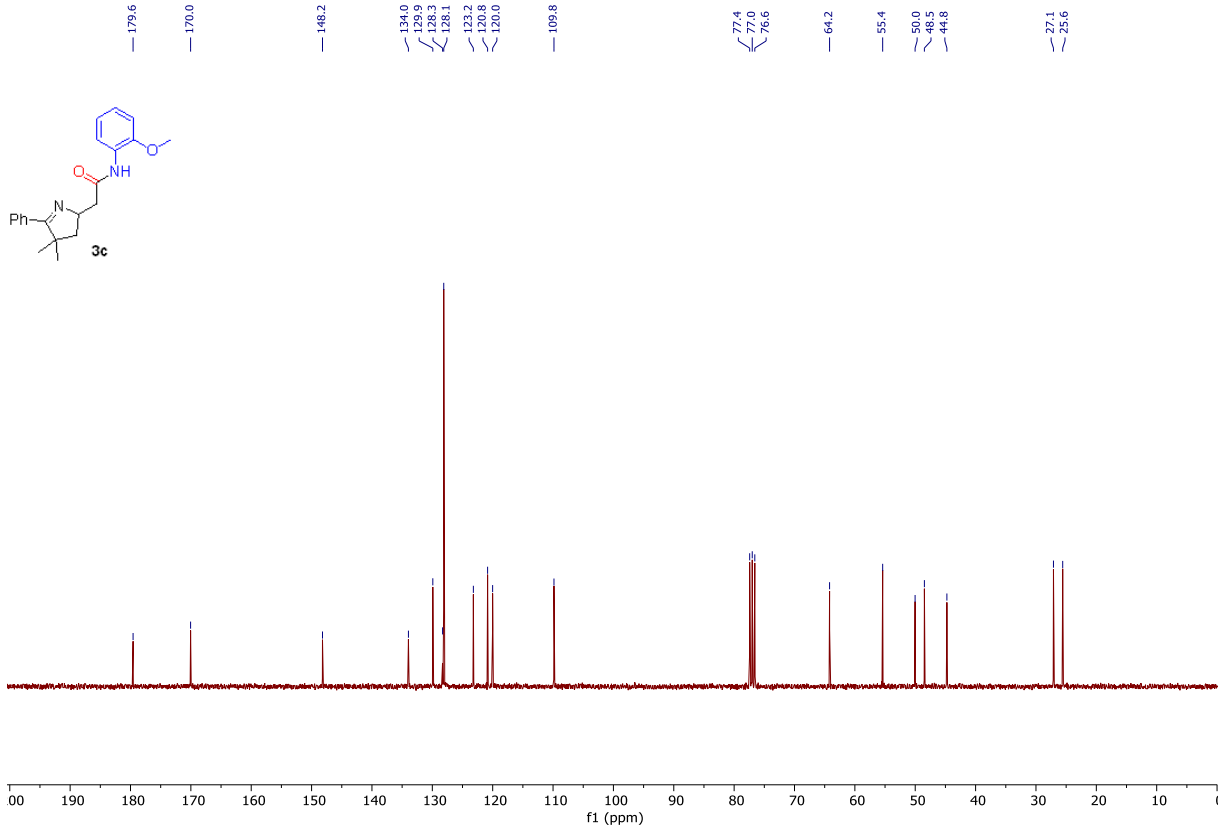





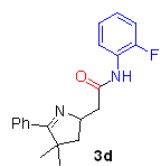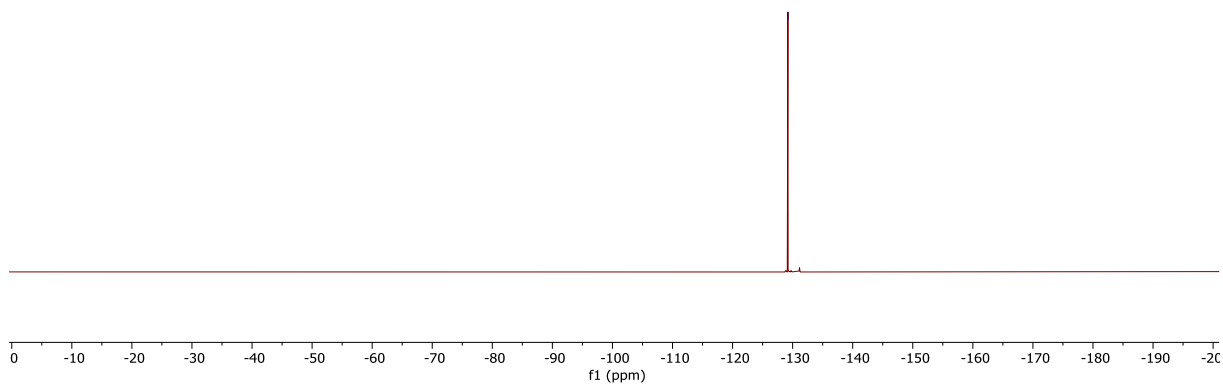

200409.f353.10.fid — Youcan Zhang YZhang-3-28 — PROTON CDCl3 {C:\Bruker\TopSpin3.6.0} 2004 53 — 300.20MHz

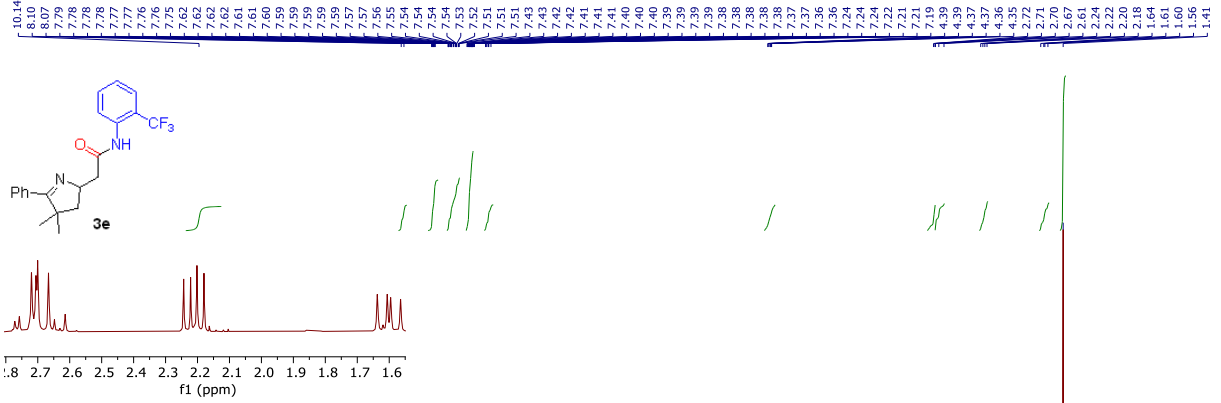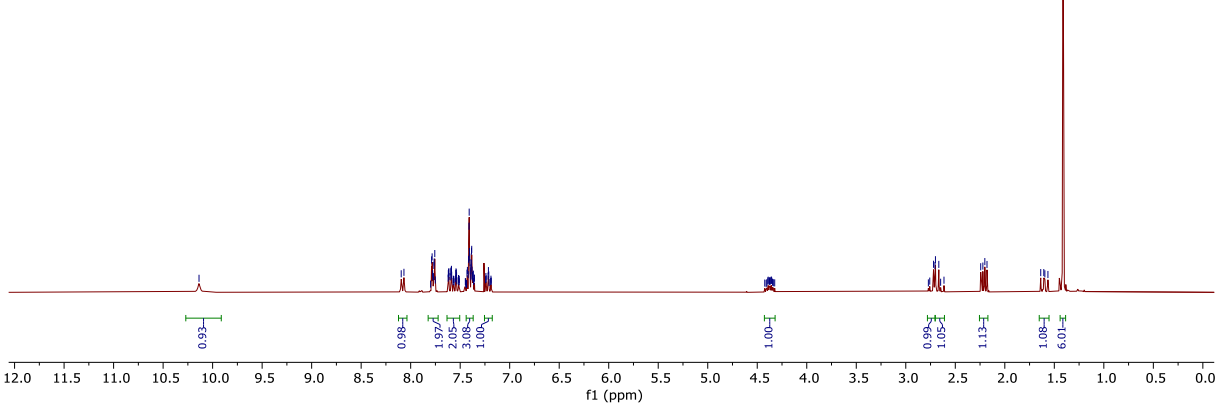

200409.f353.11.fid — Youcan Zhang YZhang-3-28 — C13CPD CDCl3 {C:\Bruker\TopSpin3.6.0} 2004 53 — 75.49MHz

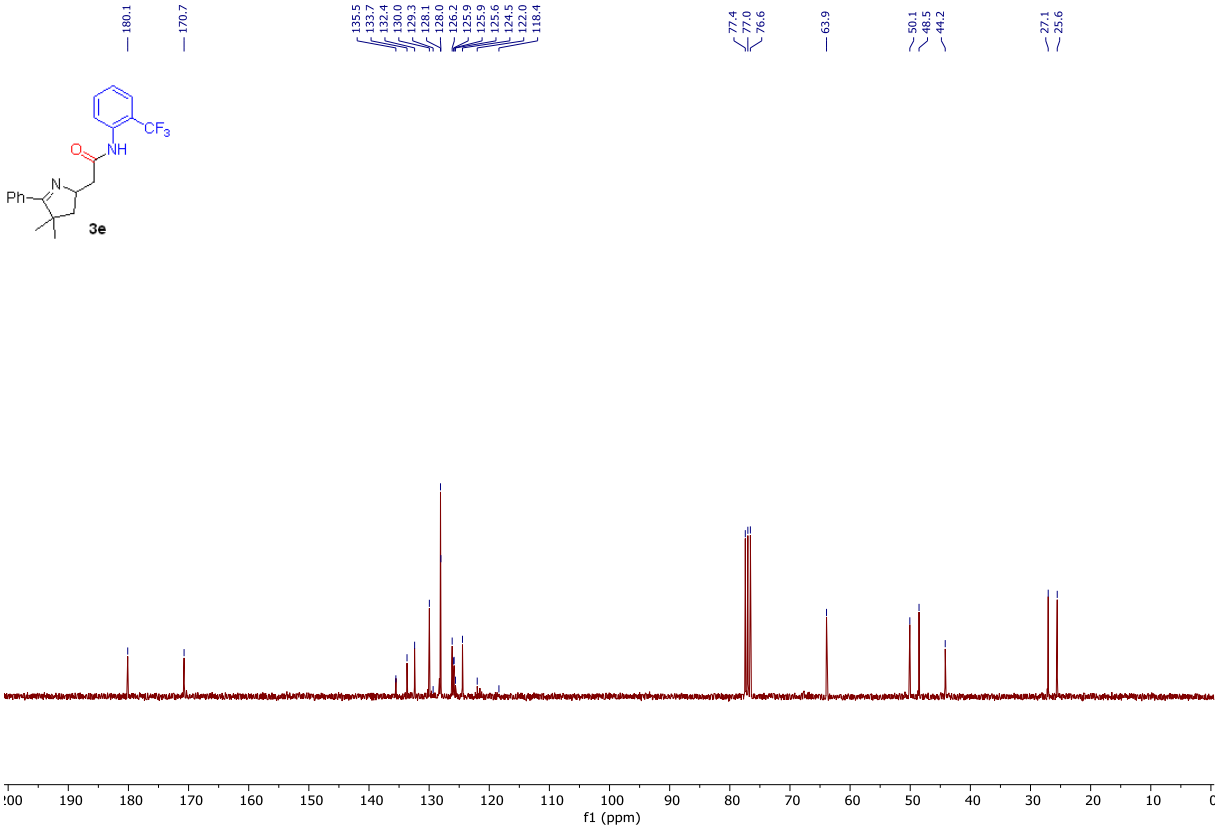

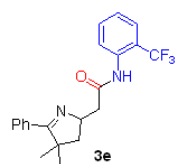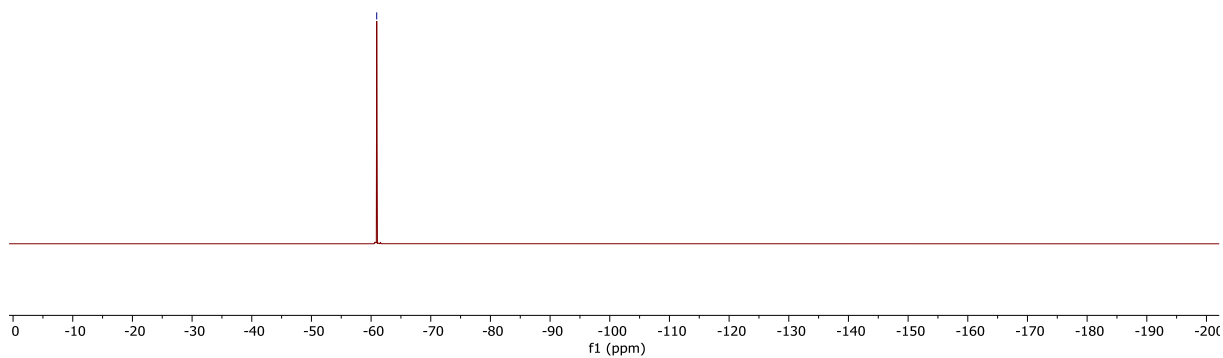

200508.f357.10.fid — Youcan Zhang YZhang-3-140 — PROTON CDCl3 {C:\Bruker\TopSpin3.6.0} 2005 57 — 300.20MHz

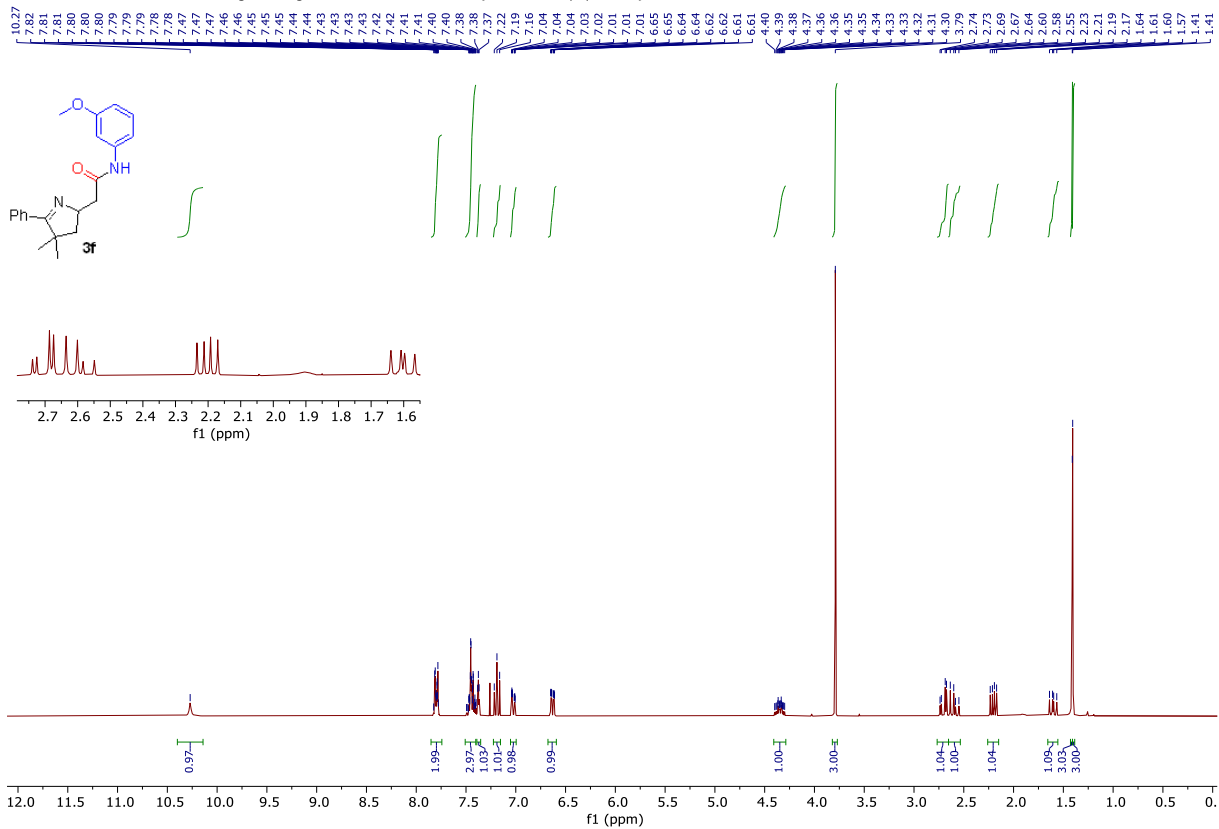

200508.f357.11.fid — Youcan Zhang YZhang-3-140 — C13CPD CDCl3 {C:\Bruker\TopSpin3.6.0} 2005 57 — 75.49MHz

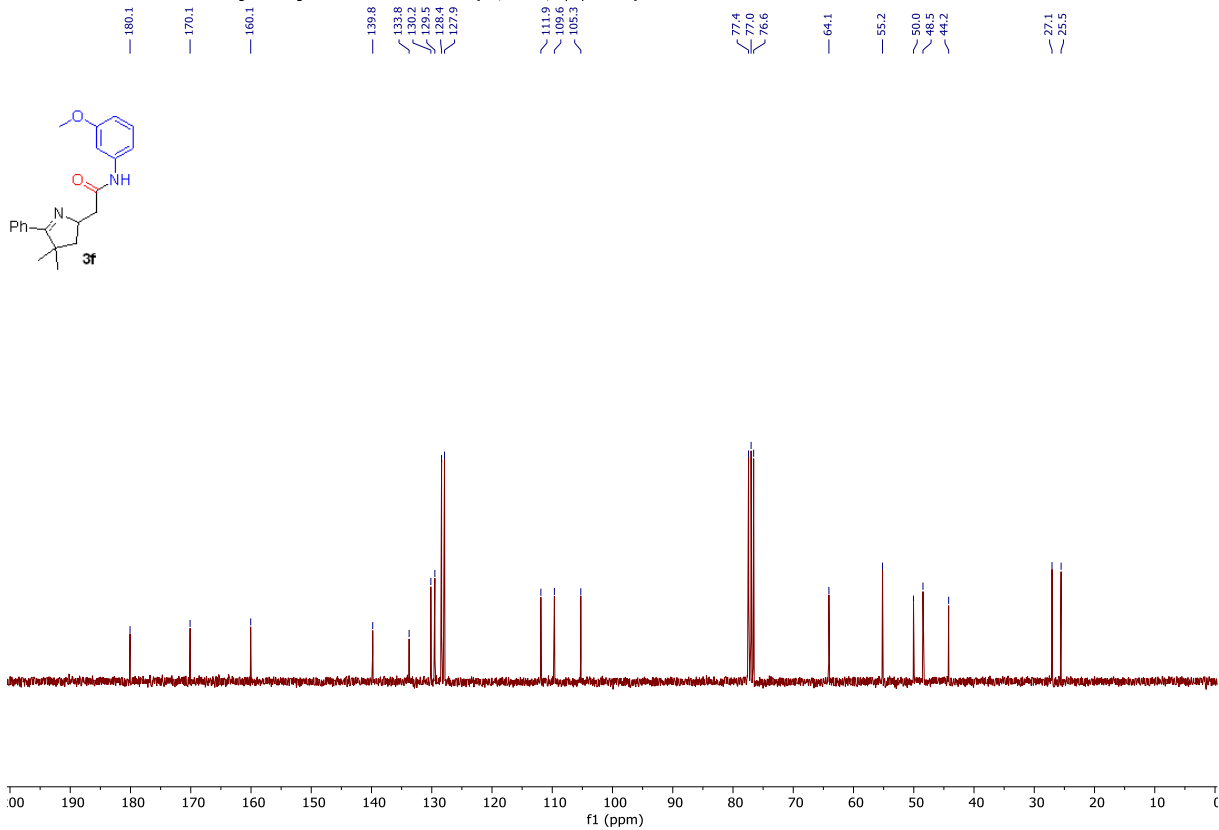

200420.f341.10.fid — Youcan Zhang YZhang-3-61 — PROTON CDCl3 {C:\Bruker\TopSpin3.6.0} 2004 41 — 300.20MHz

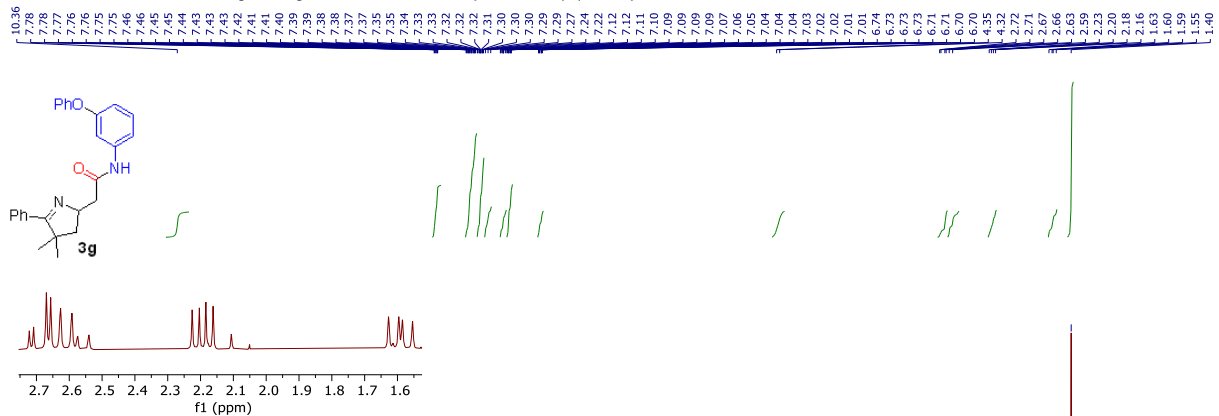

200420.f341.11.fid — Youcan Zhang YZhang-3-61 — C13CPD CDCl3 {C:\Bruker\TopSpin3.6.0} 2004 41 — 75.49MHz

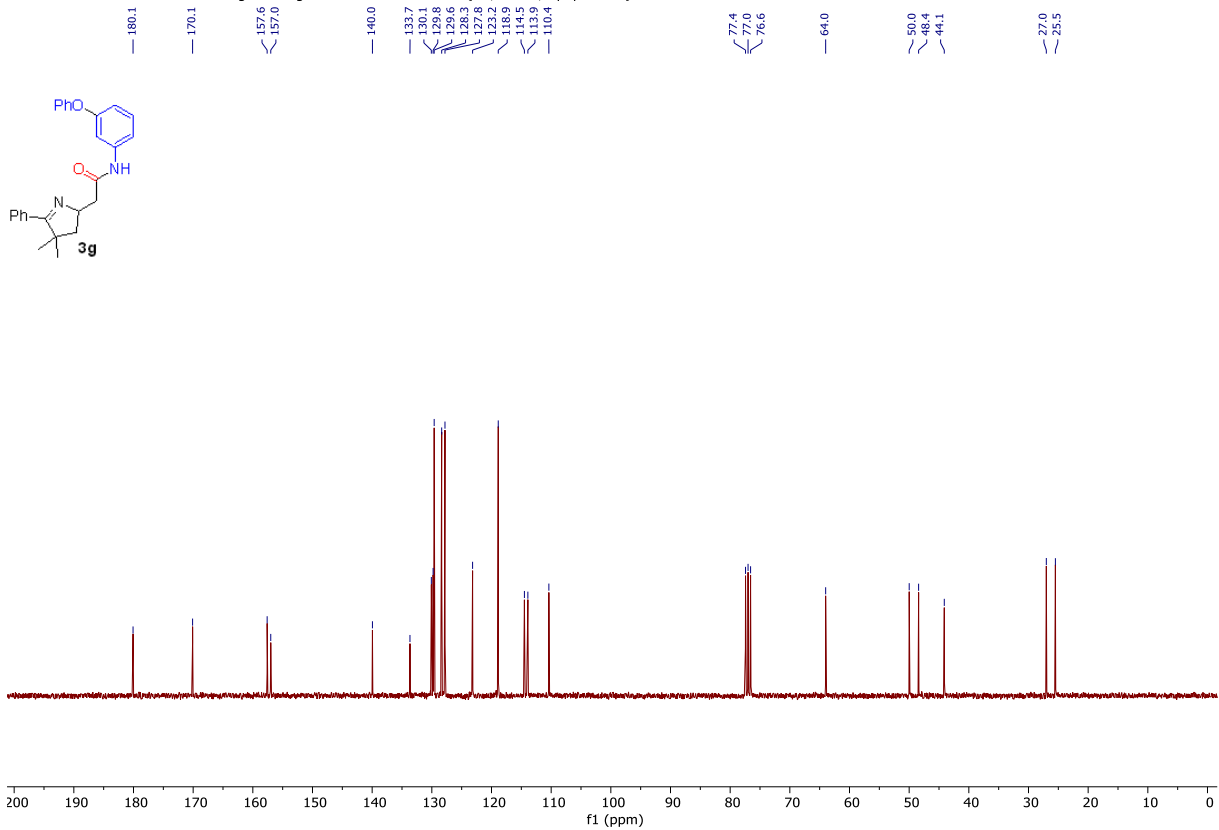

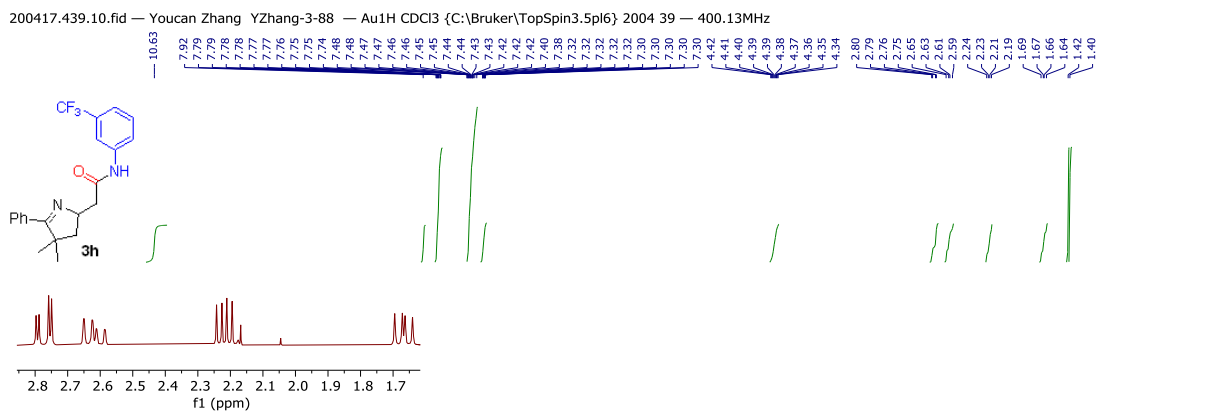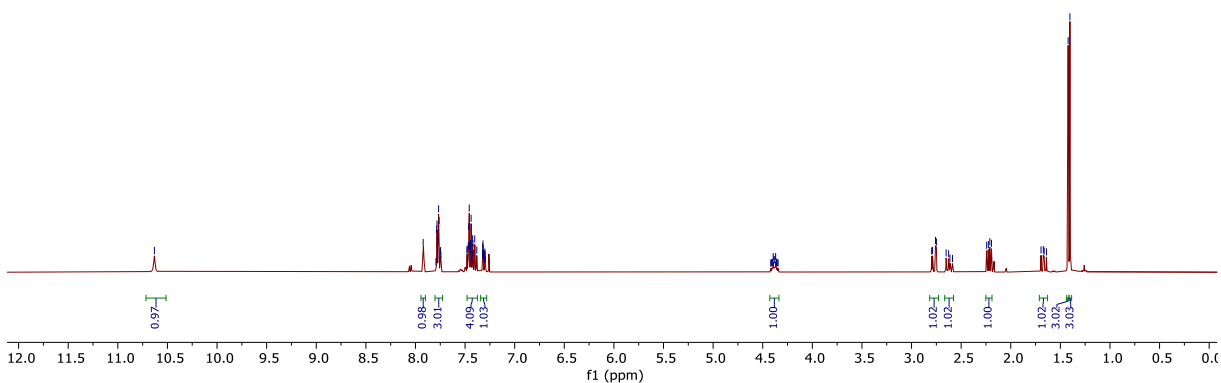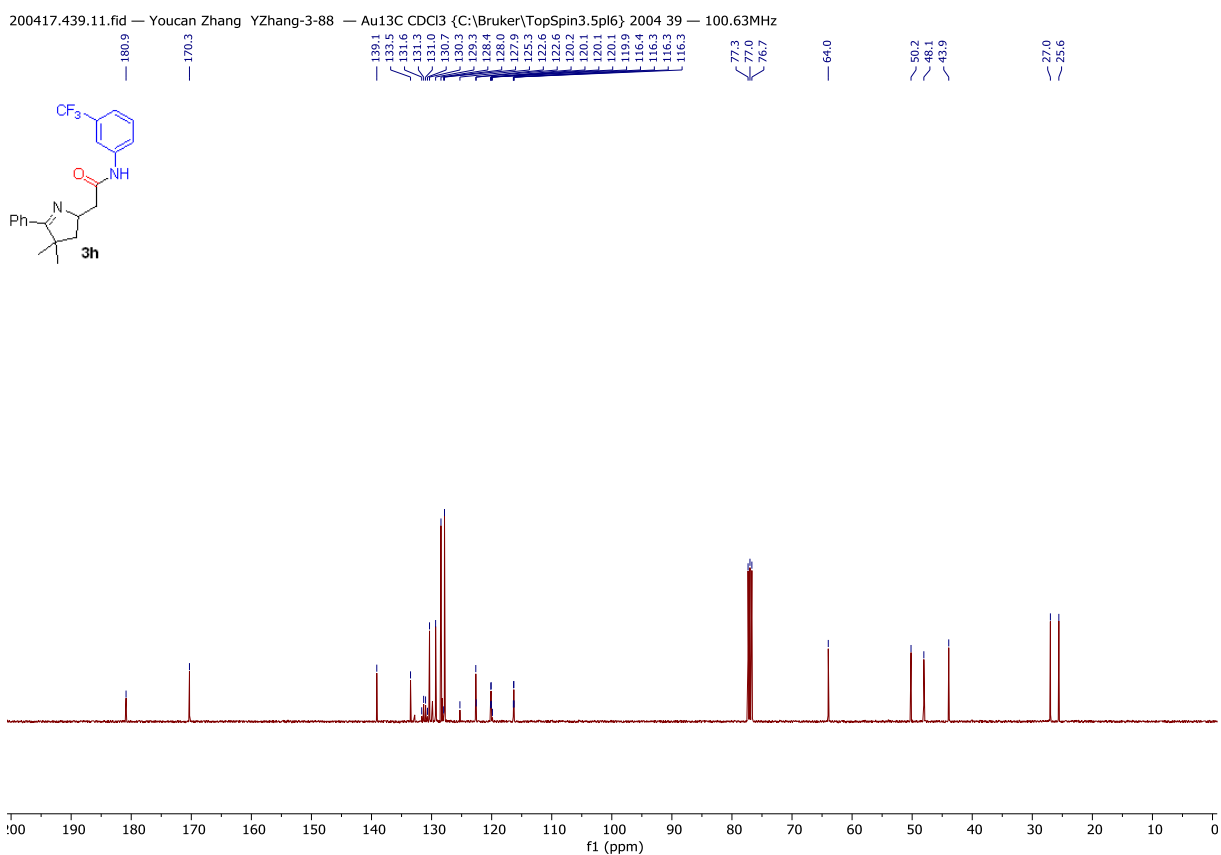

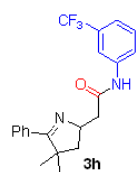

— 62.7

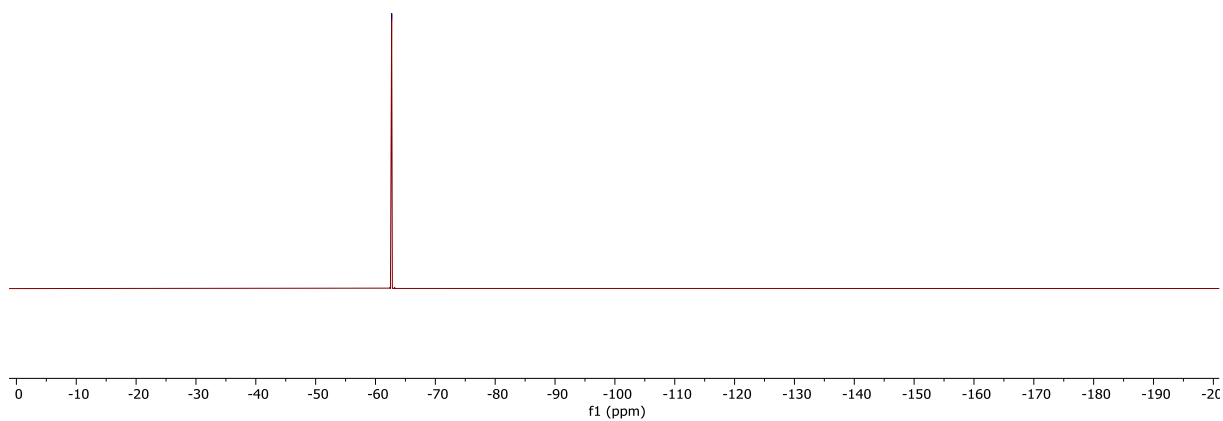



200420.f342.10.fid — Youcan Zhang YZhang-3-66 — PROTON CDCl3 {C:\Bruker\TopSpin3.6.0} 2004 42 — 300.20MHz

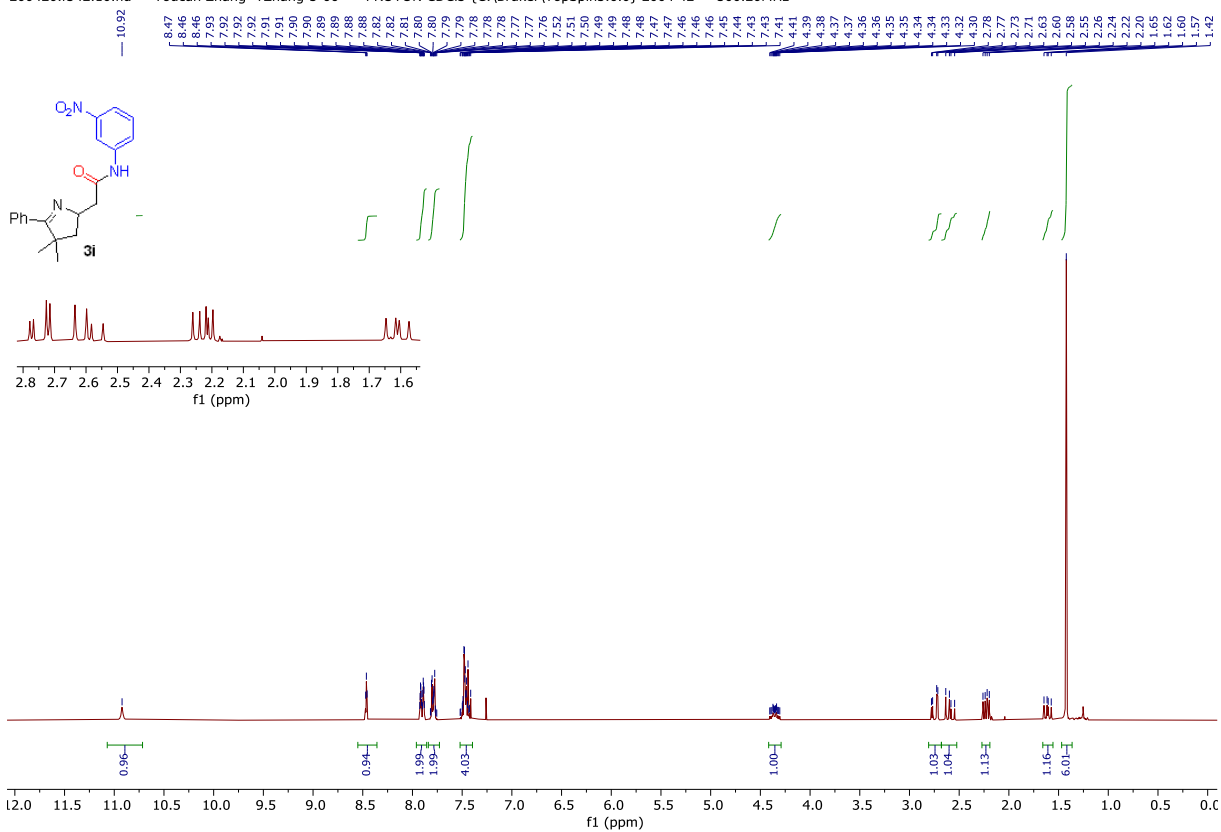

200420.f342.11.fid — Youcan Zhang YZhang-3-66 — C13CPD CDCl3 {C:\Bruker\TopSpin3.6.0} 2004 42 — 75.49MHz

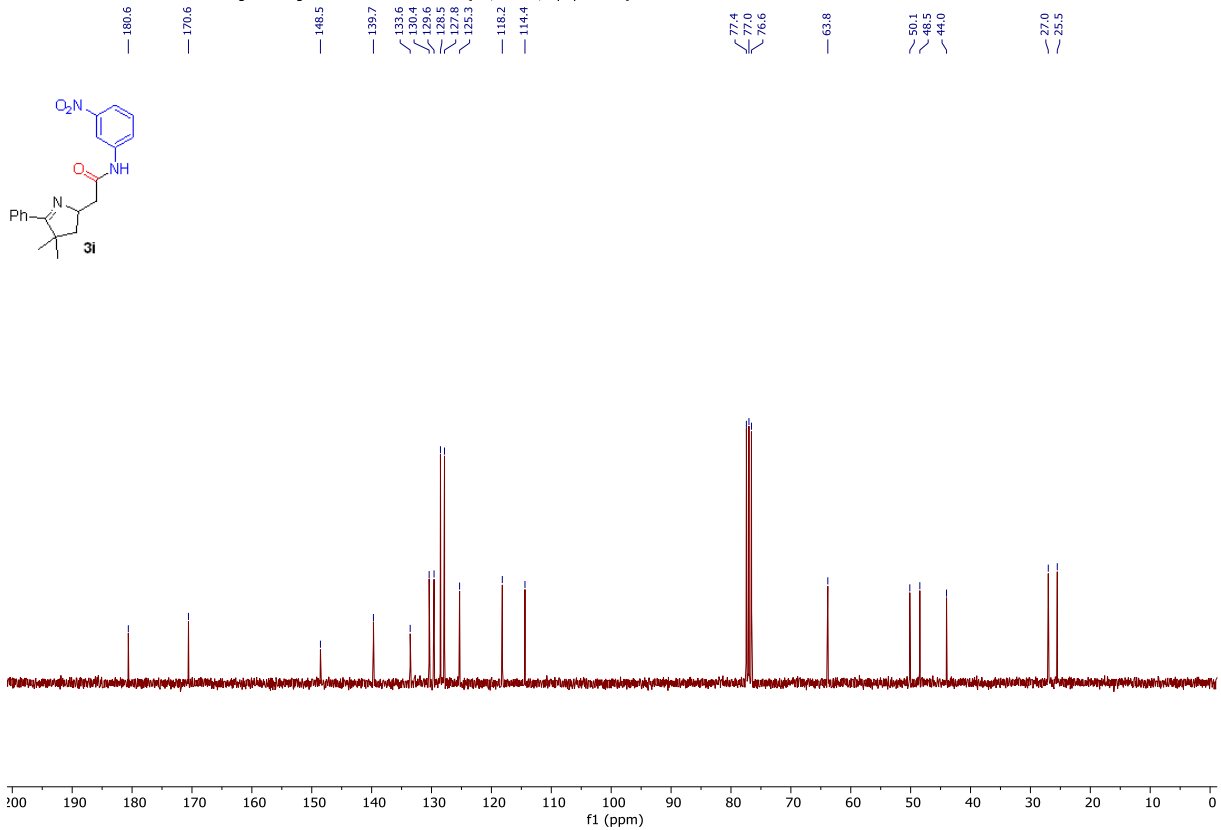

200406.f350.10.fid — Youcan Zhang YZhang-3-45 — PROTON CDCl3 {C:\Bruker\TopSpin3.6.0} 2004 50 — 300.20MHz

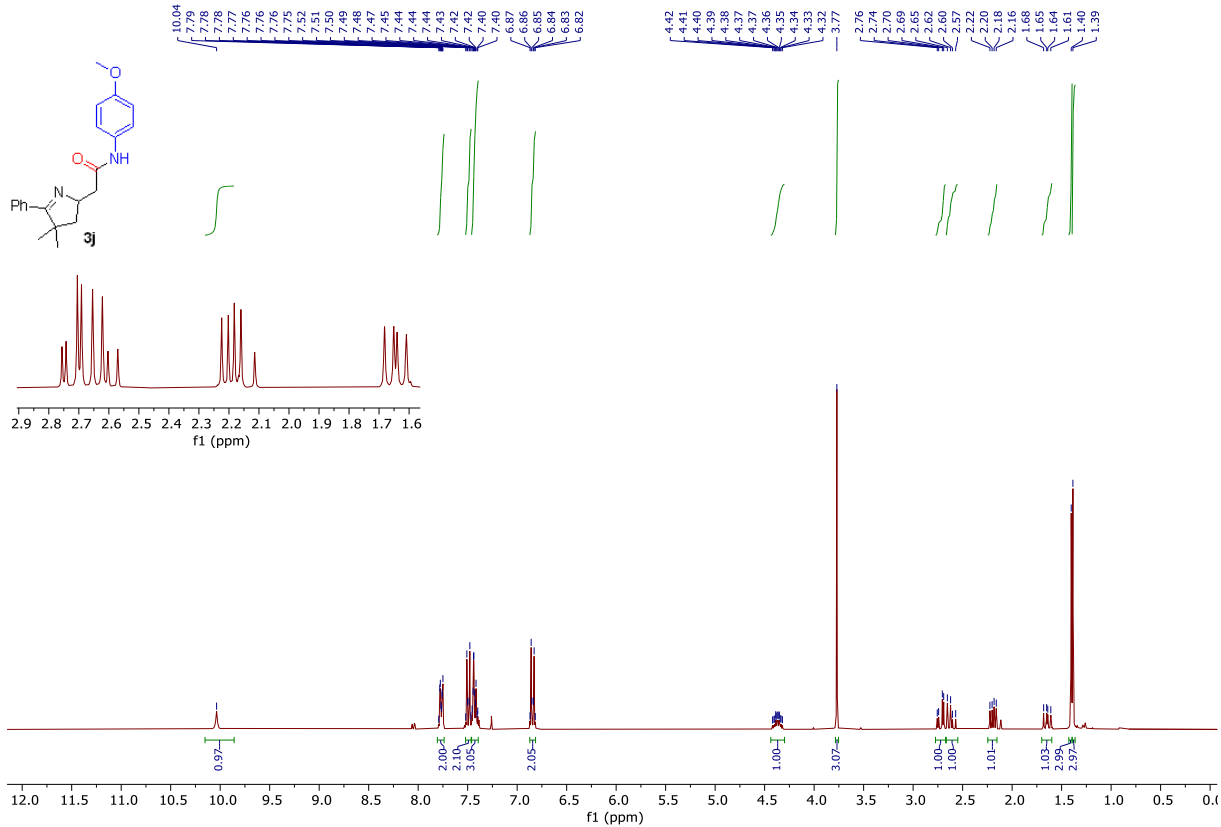

200406.f350.11.fid — Youcan Zhang YZhang-3-45 — C13CPD CDCl3 {C:\Bruker\TopSpin3.6.0} 2004 50 — 75.49MHz

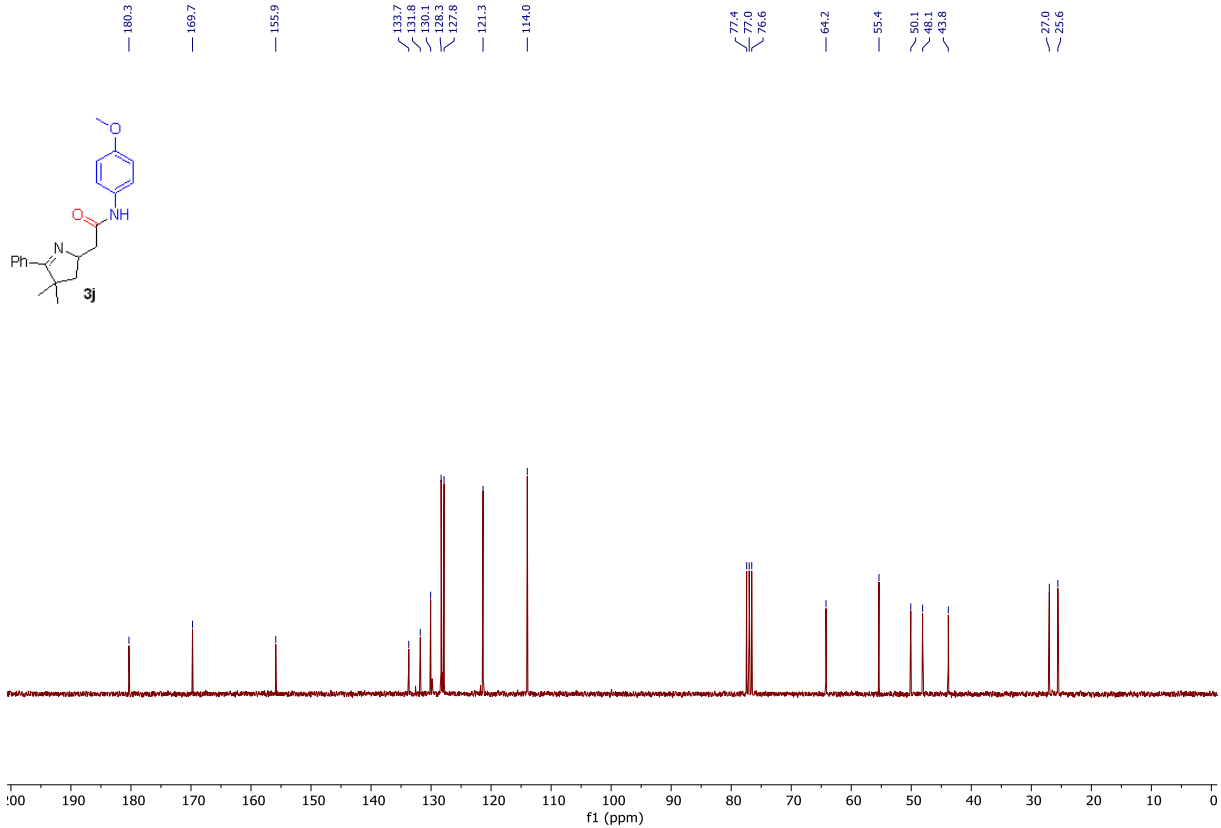

200508.f358.10.fid — Youcan Zhang YZhang-3-144 — PROTON CDCl3 {C:\Bruker\TopSpin3.6.0} 2005 58 — 300.20MHz

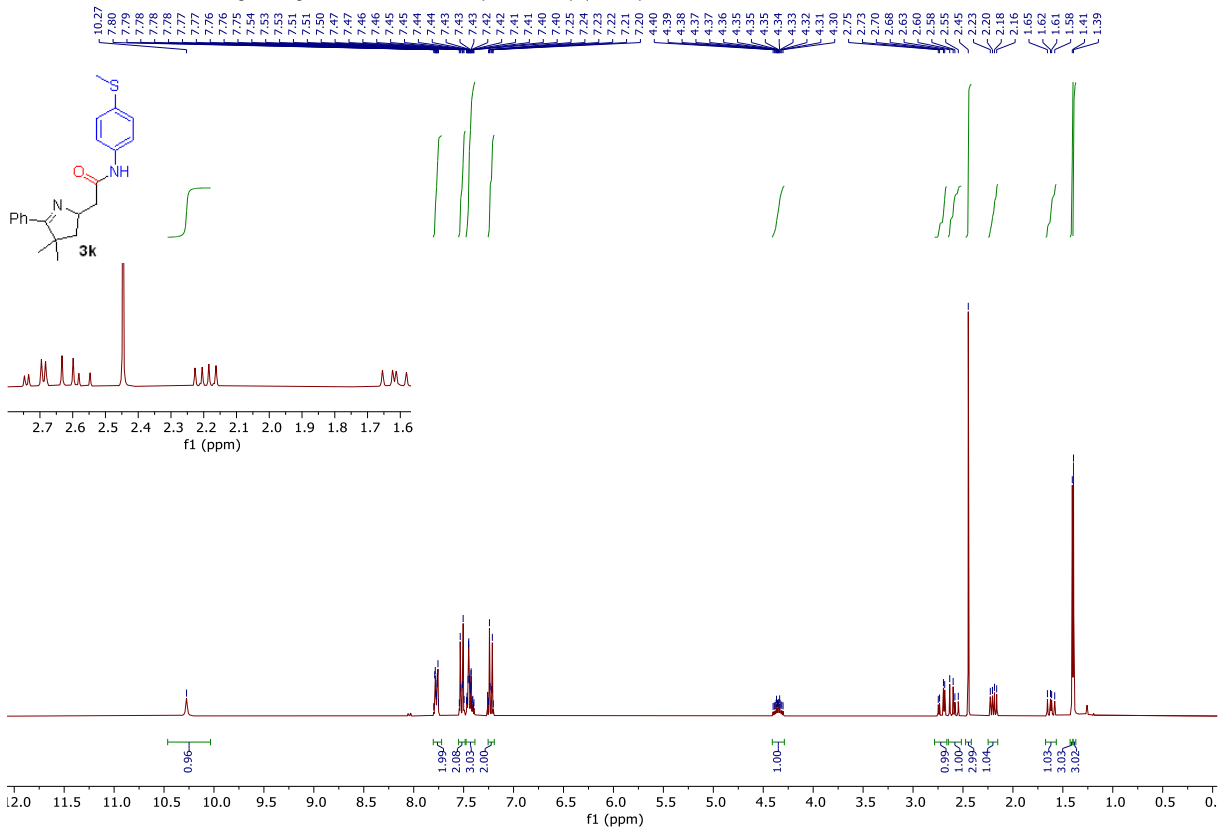

200508.f358.11.fid — Youcan Zhang YZhang-3-144 — C13CPD CDCl3 {C:\Bruker\TopSpin3.6.0} 2005 58 — 75.49MHz

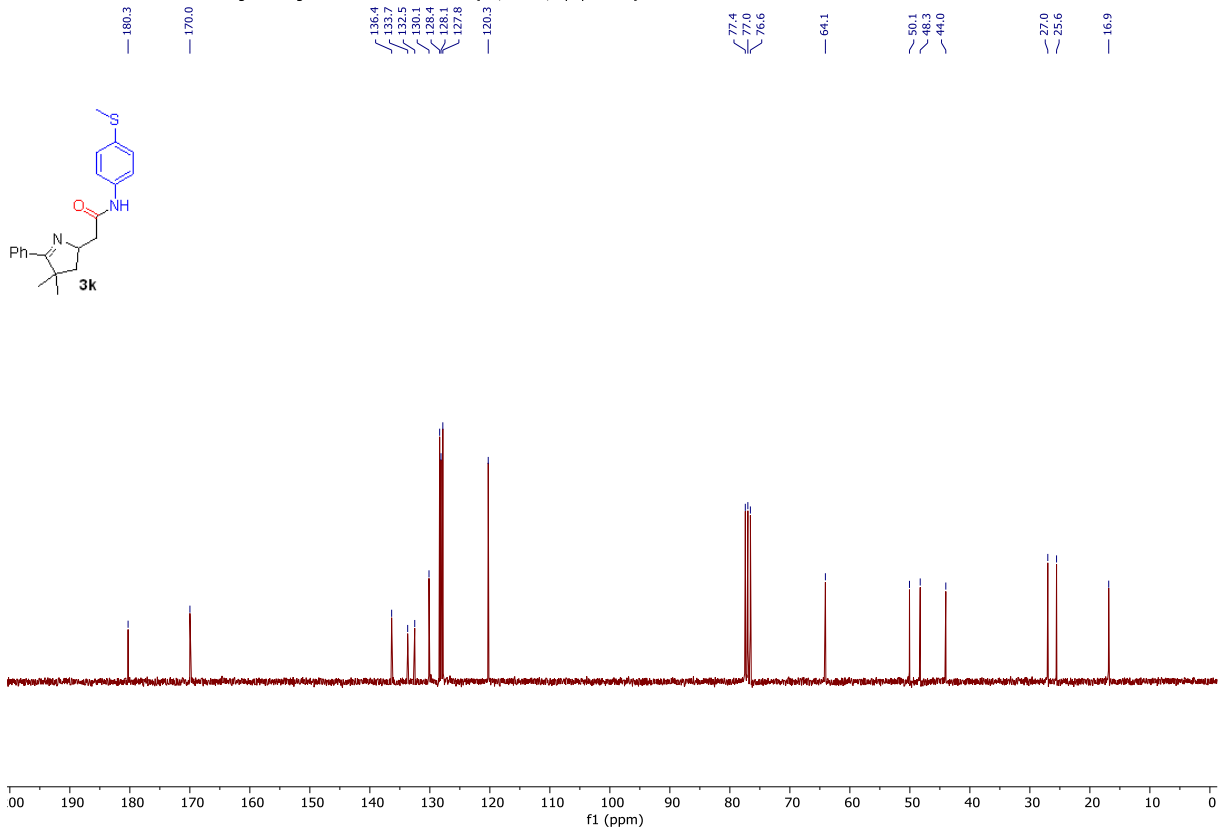

200417.f329.10.fid — Youcan Zhang YZhang-3-47 — PROTON CDCl3 {C:\Bruker\TopSpin3.6.0} 2004 29 — 300.20MHz

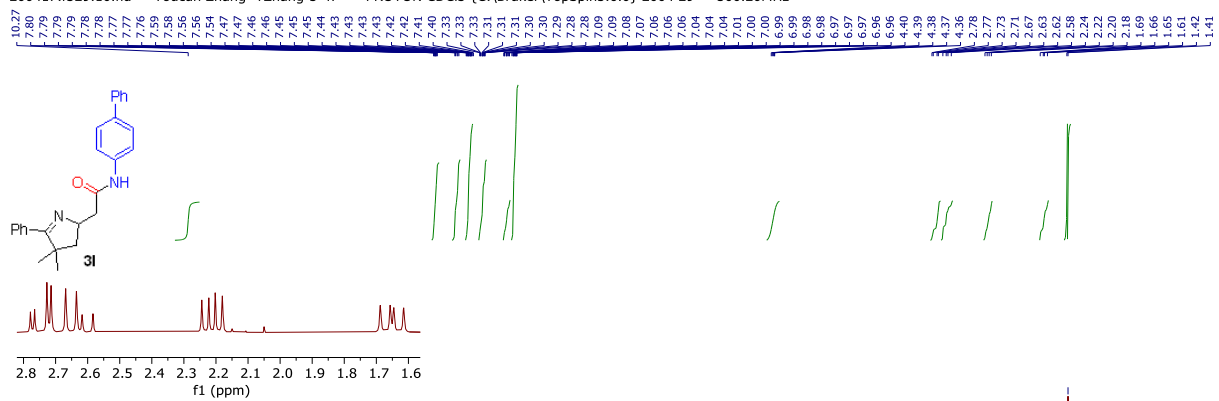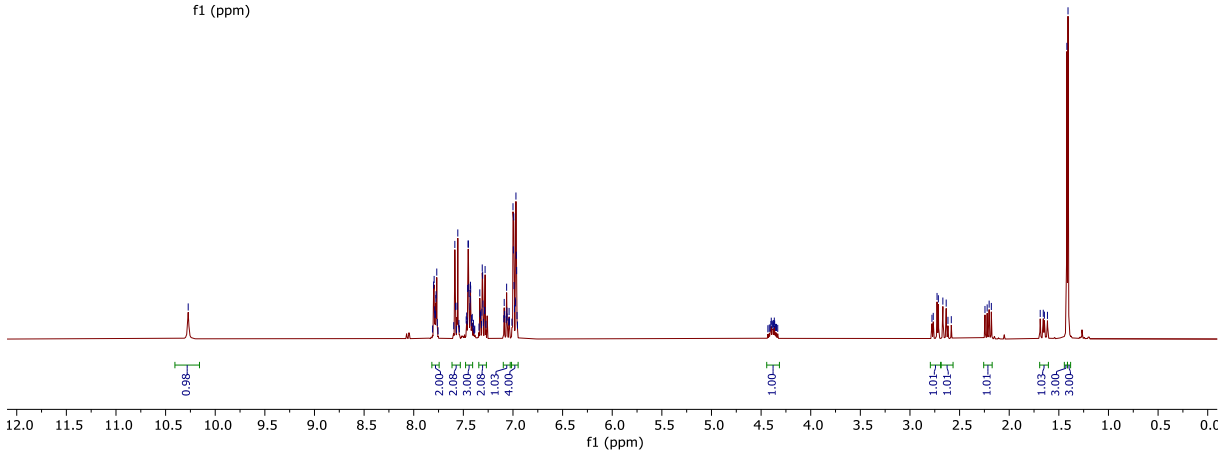

200417.f329.11.fid — Youcan Zhang YZhang-3-47 — C13CPD CDCl3 {C:\Bruker\TopSpin3.6.0} 2004 29 — 75.49MHz

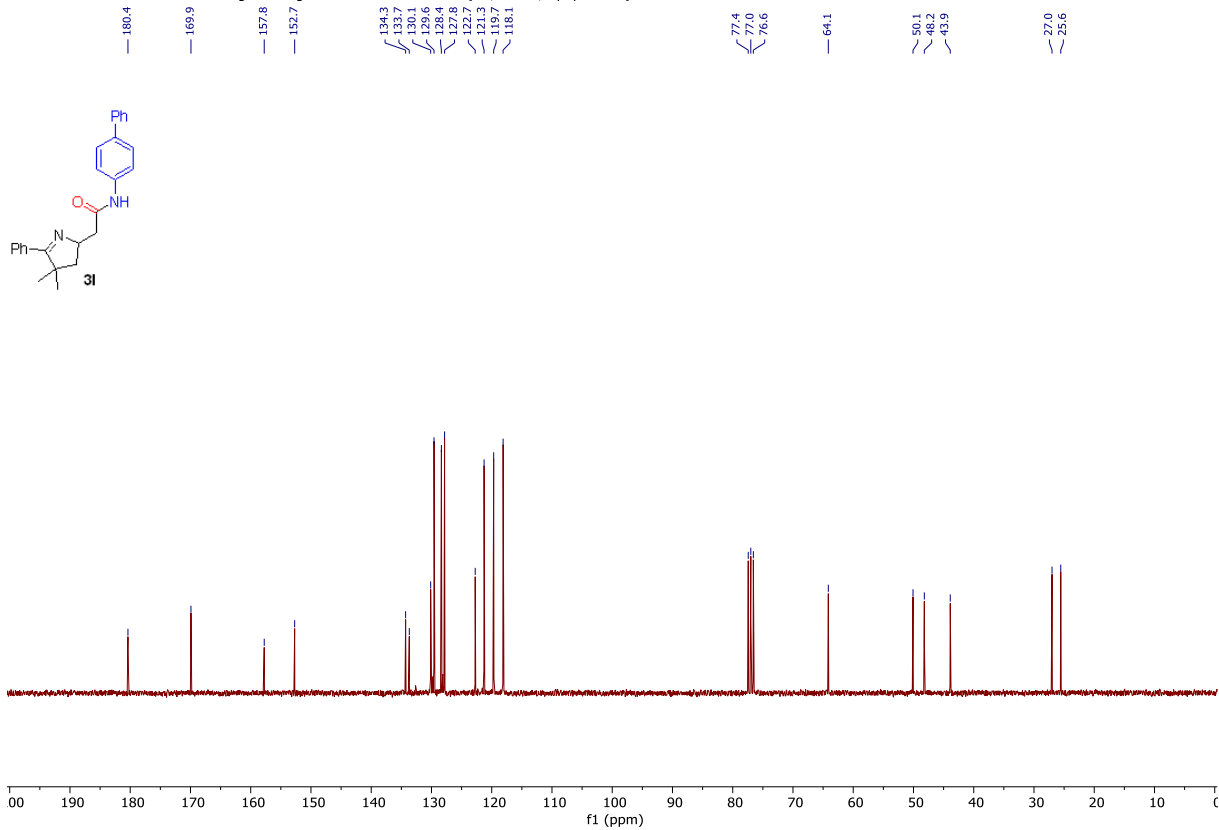

200409.f354.10.fid — Youcan Zhang YZhang-3-44 — PROTON CDCl3 {C:\Bruker\TopSpin3.6.0} 2004 54 — 300.20MHz

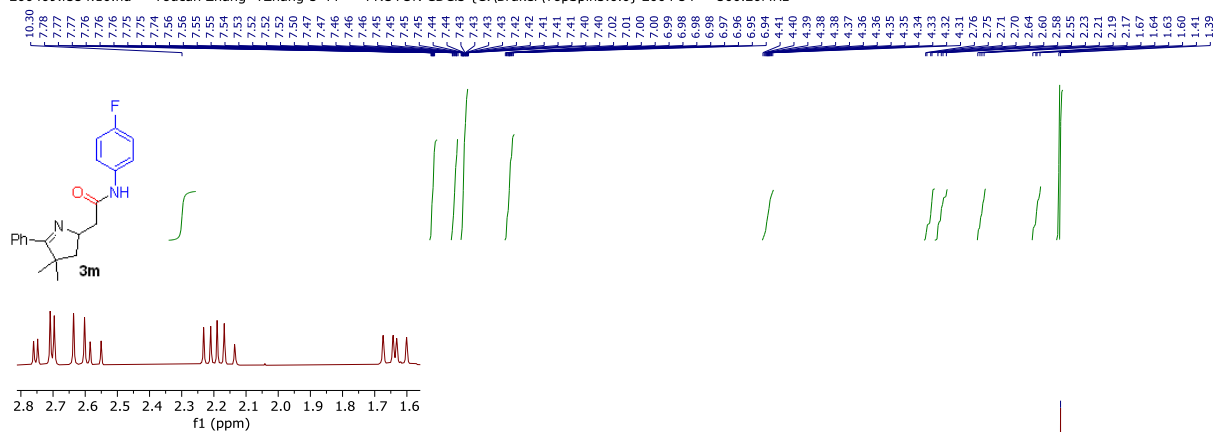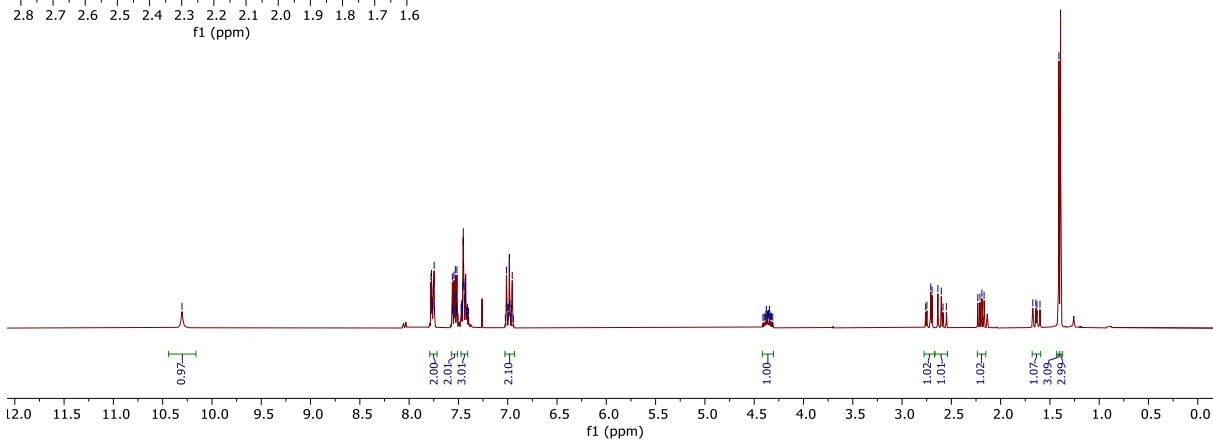

200409.f354.11.fid — Youcan Zhang YZhang-3-44 — C13CPD CDCl3 {C:\Bruker\TopSpin3.6.0} 2004 54 — 75.49MHz

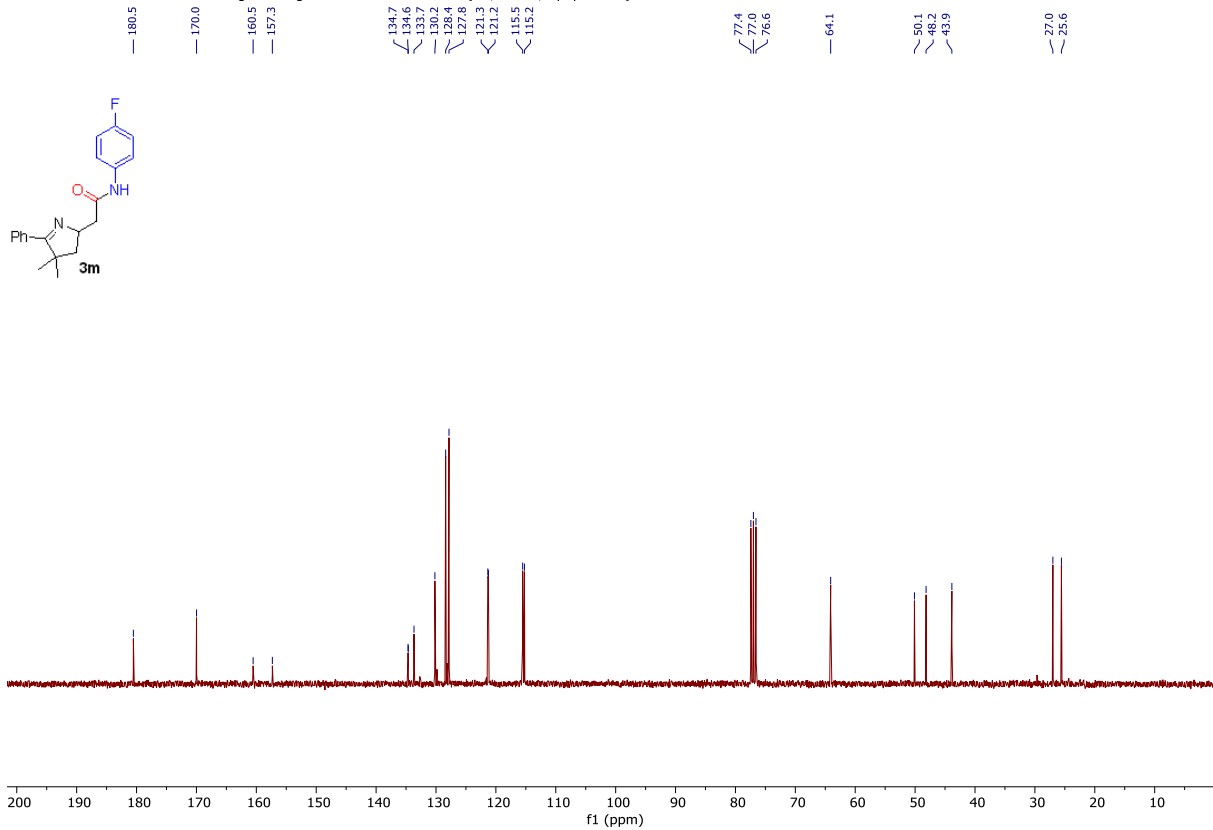

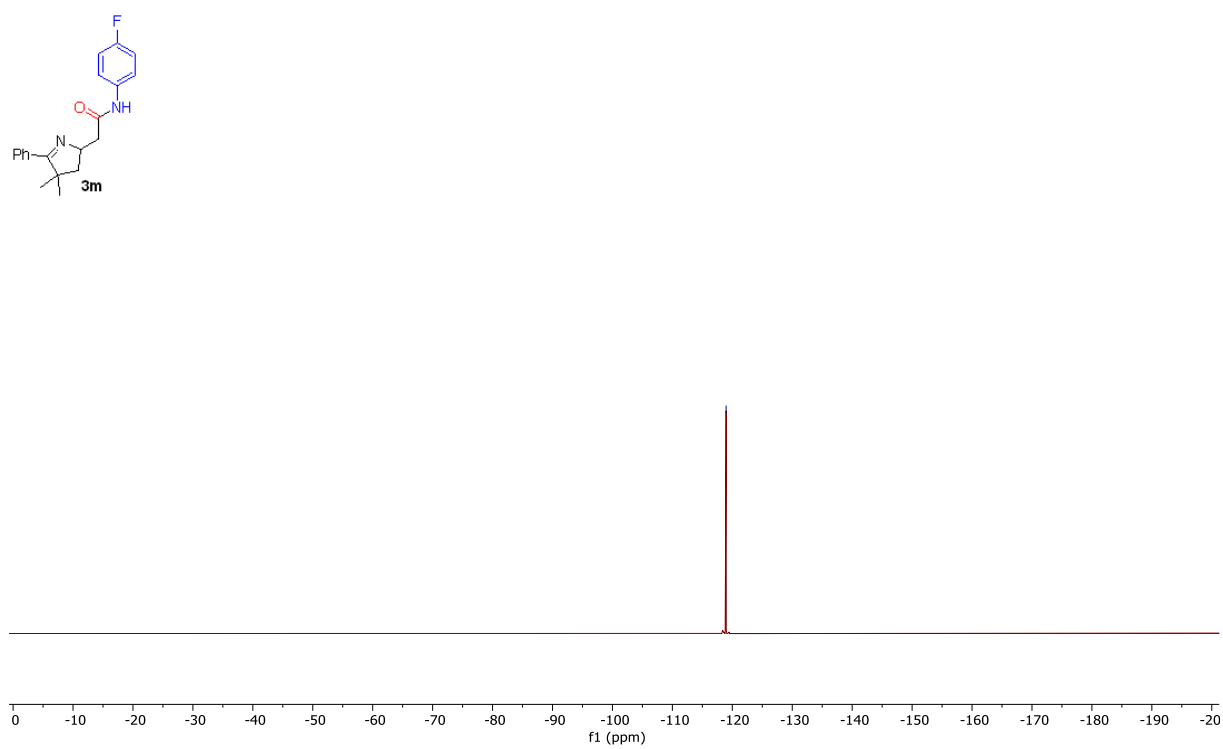



200424.f364.10.fid — Youcan Zhang YZhang-3-104 — PROTON CDCl3 {C:\Bruker\TopSpin3.6.0} 2004 4 — 300.20MHz

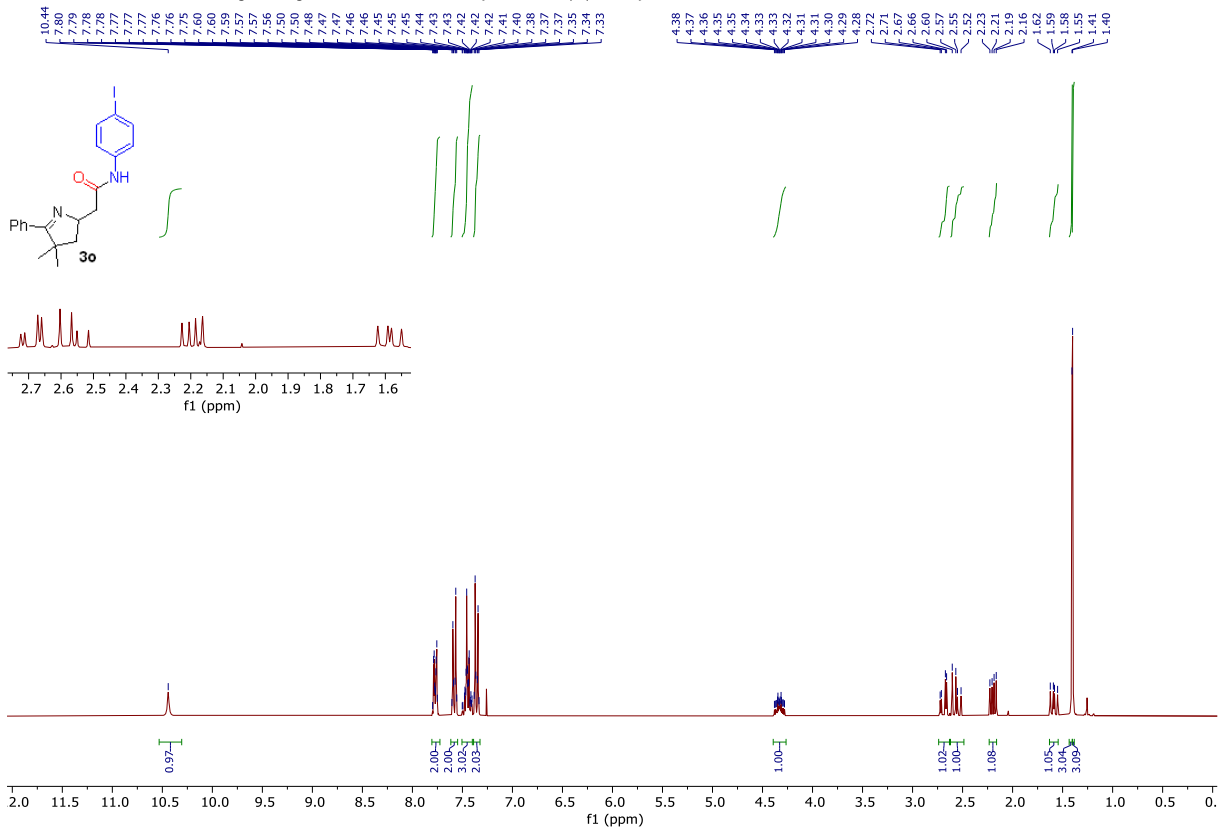

200424.f364.11.fid — Youcan Zhang YZhang-3-104 — C13CPD CDCl3 {C:\Bruker\TopSpin3.6.0} 2004 4 — 75.49MHz

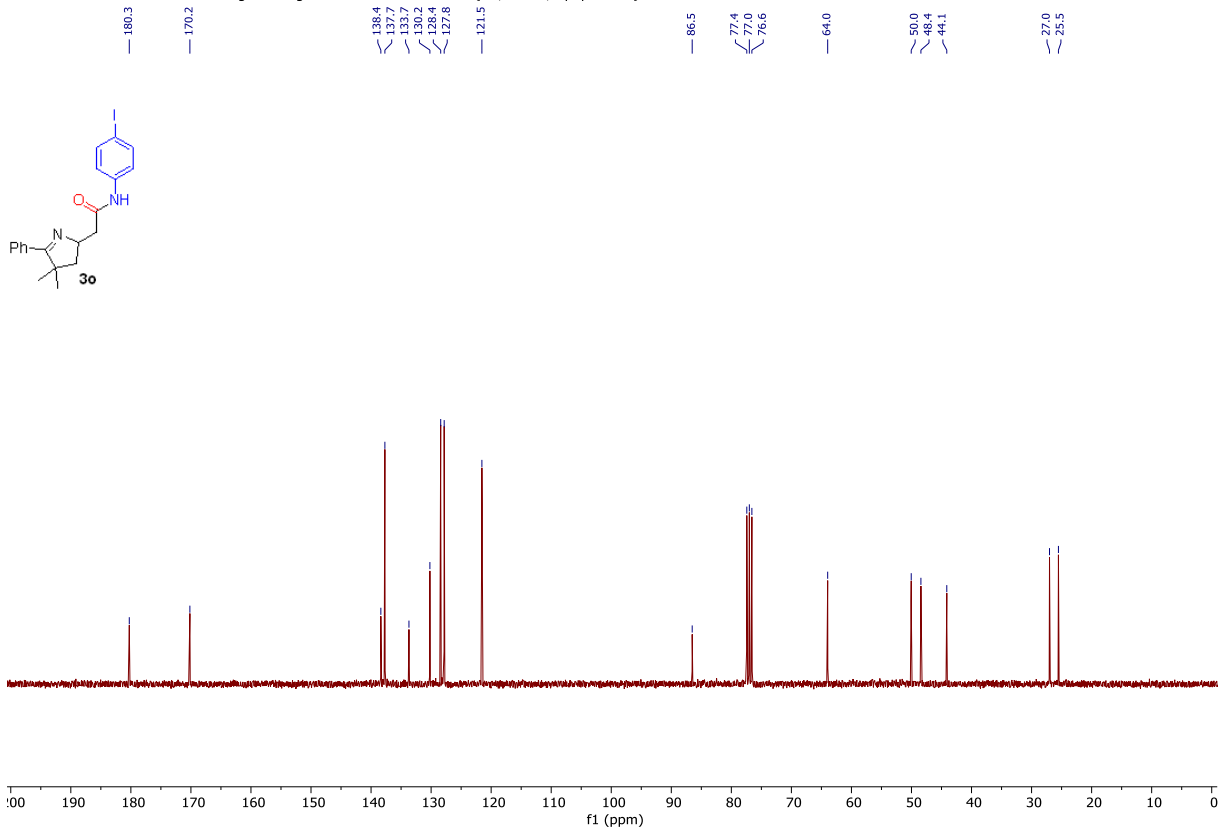



200422.f328.10.fid — Youcan Zhang YZhang-3-102 — PROTON CDCl3 {C:\Bruker\TopSpin3.6.0} 2004 28 — 300.20MHz

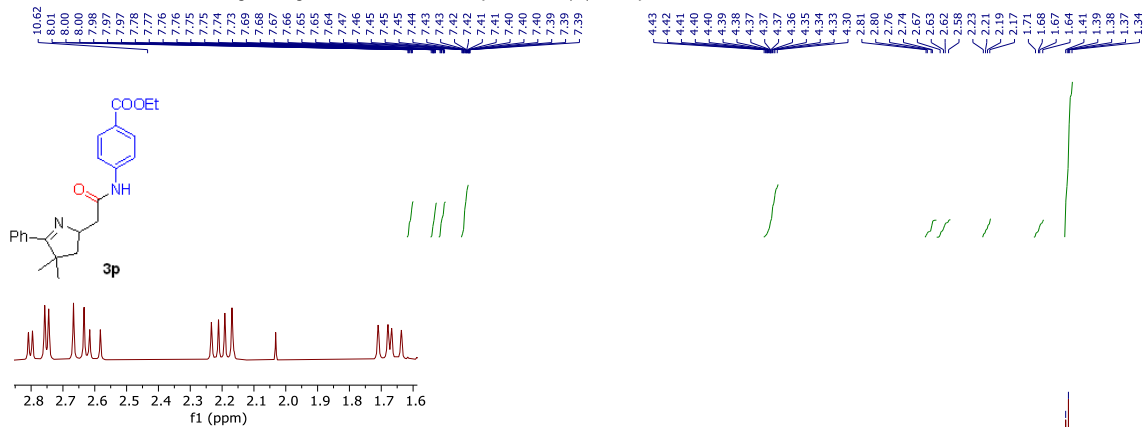

200422.f328.11.fid — Youcan Zhang YZhang-3-102 — C13CPD CDCl3 {C:\Bruker\TopSpin3.6.0} 2004 28 — 75.49MHz

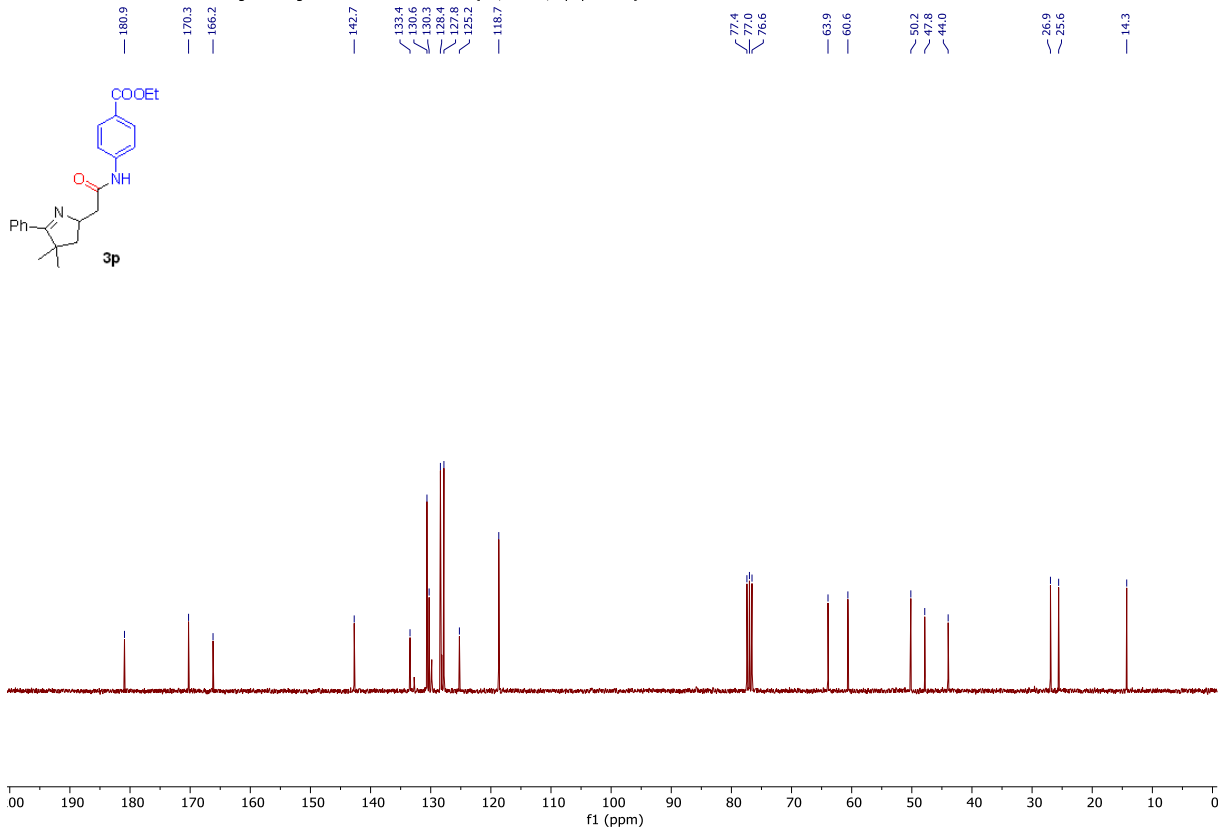

200415.f348.10.fid — Youcan Zhang YZhang-3-87 — PROTON CDCl3 {C:\Bruker\TopSpin3.6.0} 2004 48 — 300.20MHz

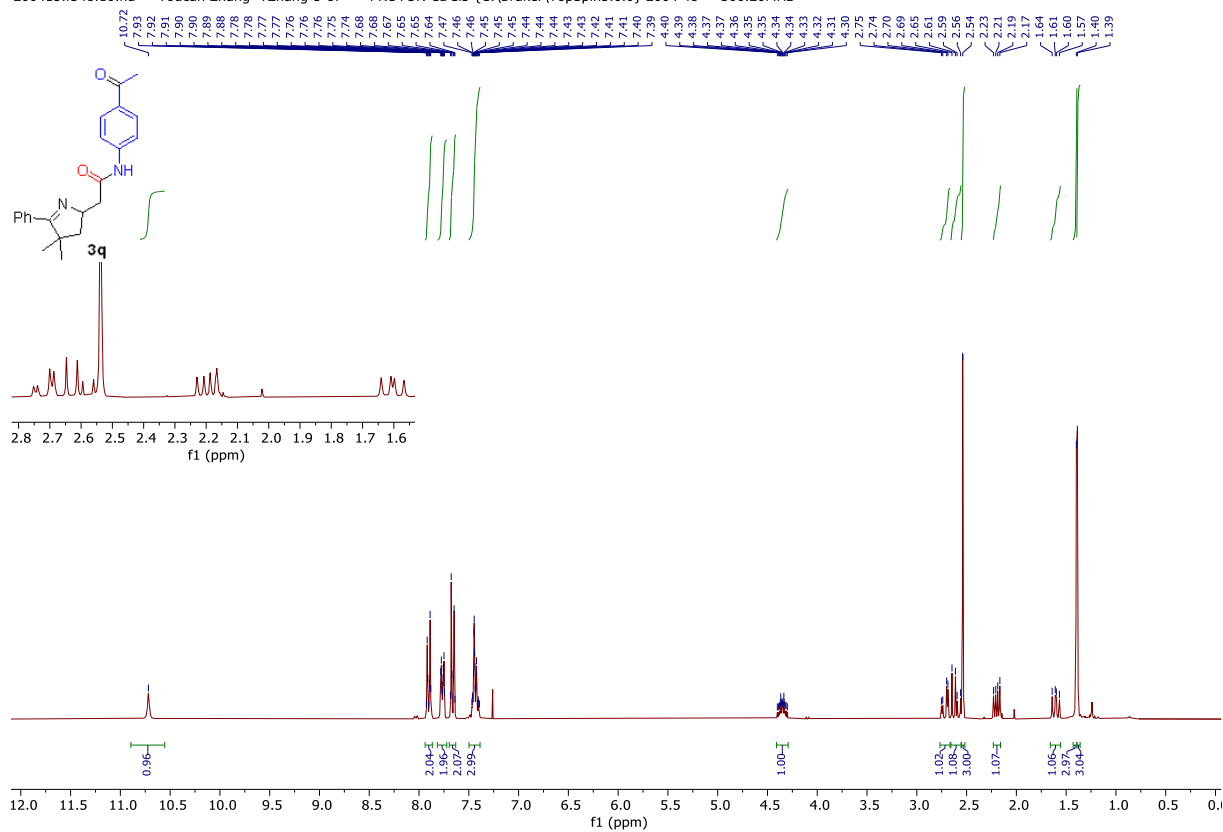

200415.f348.11.fid — Youcan Zhang YZhang-3-87 — C13CPD CDCl3 {C:\Bruker\TopSpin3.6.0} 2004 48 — 75.49MHz

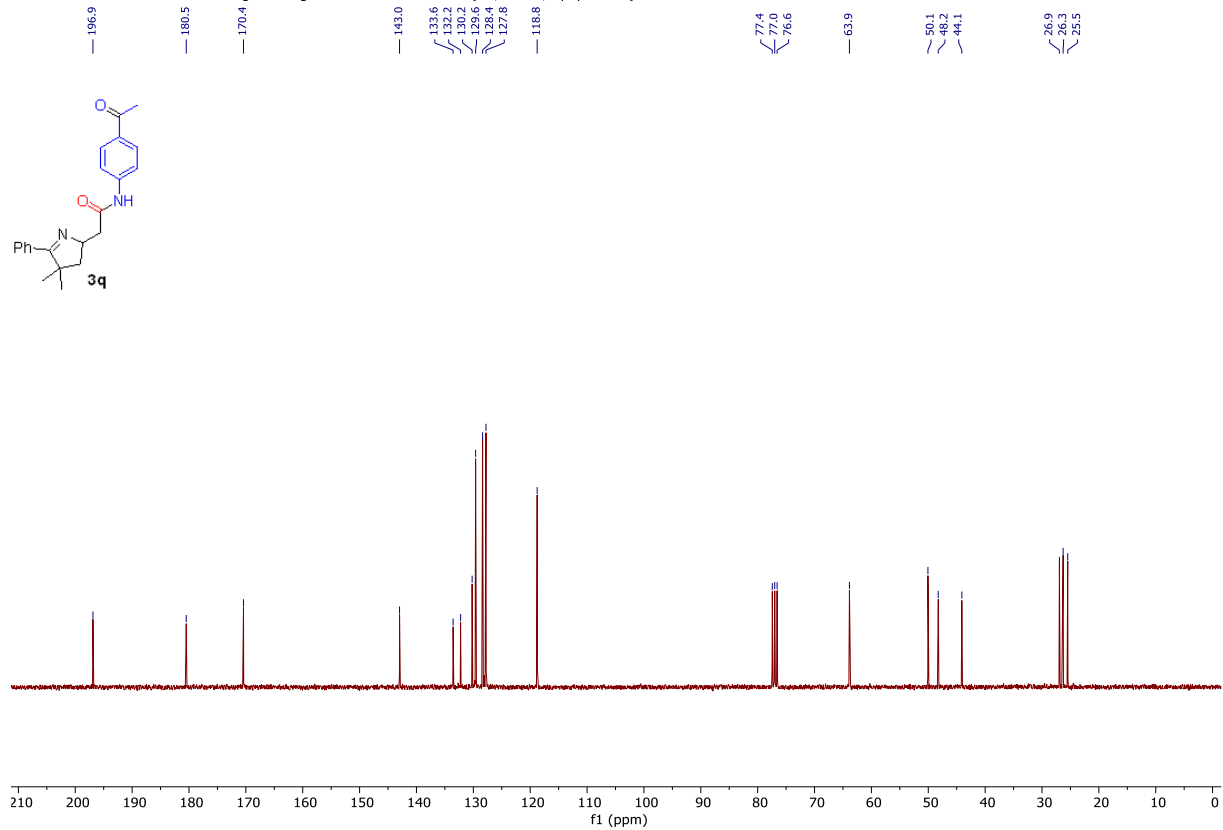

200506.f350.10.fid — Youcan Zhang YZhang-3-90 — PROTON CDCl3 {C:\Bruker\TopSpin3.6.0} 2005 50 — 300.20MHz

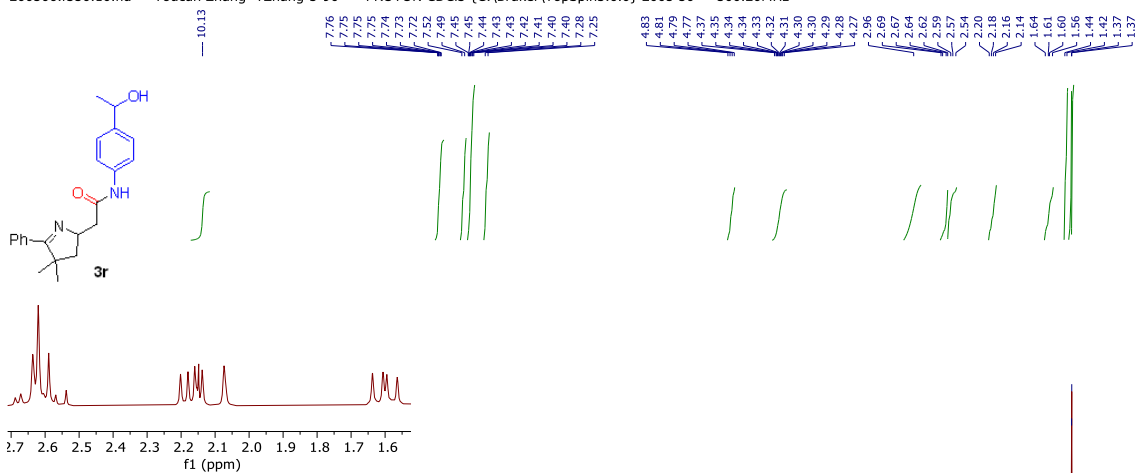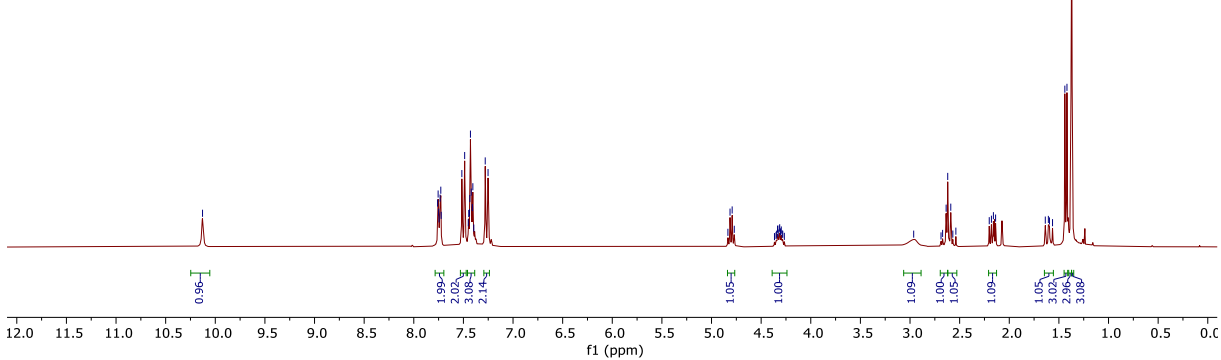

200506.f350.11.fid — Youcan Zhang YZhang-3-90 — C13CPD CDCl3 {C:\Bruker\TopSpin3.6.0} 2005 50 — 75.49MHz

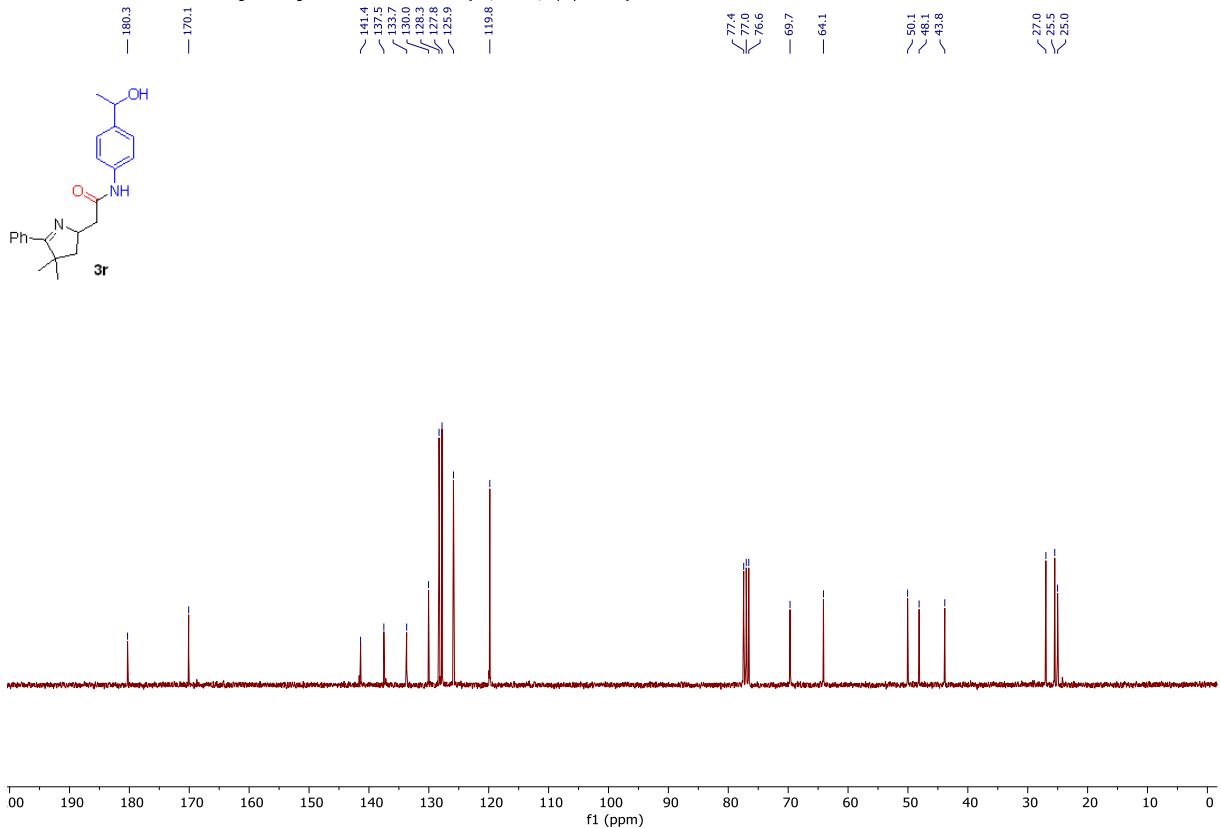

200409.f355.10.fid — Youcan Zhang YZhang-3-43 — PROTON CDCl3 {C:\Bruker\TopSpin3.6.0} 2004 55 — 300.20MHz

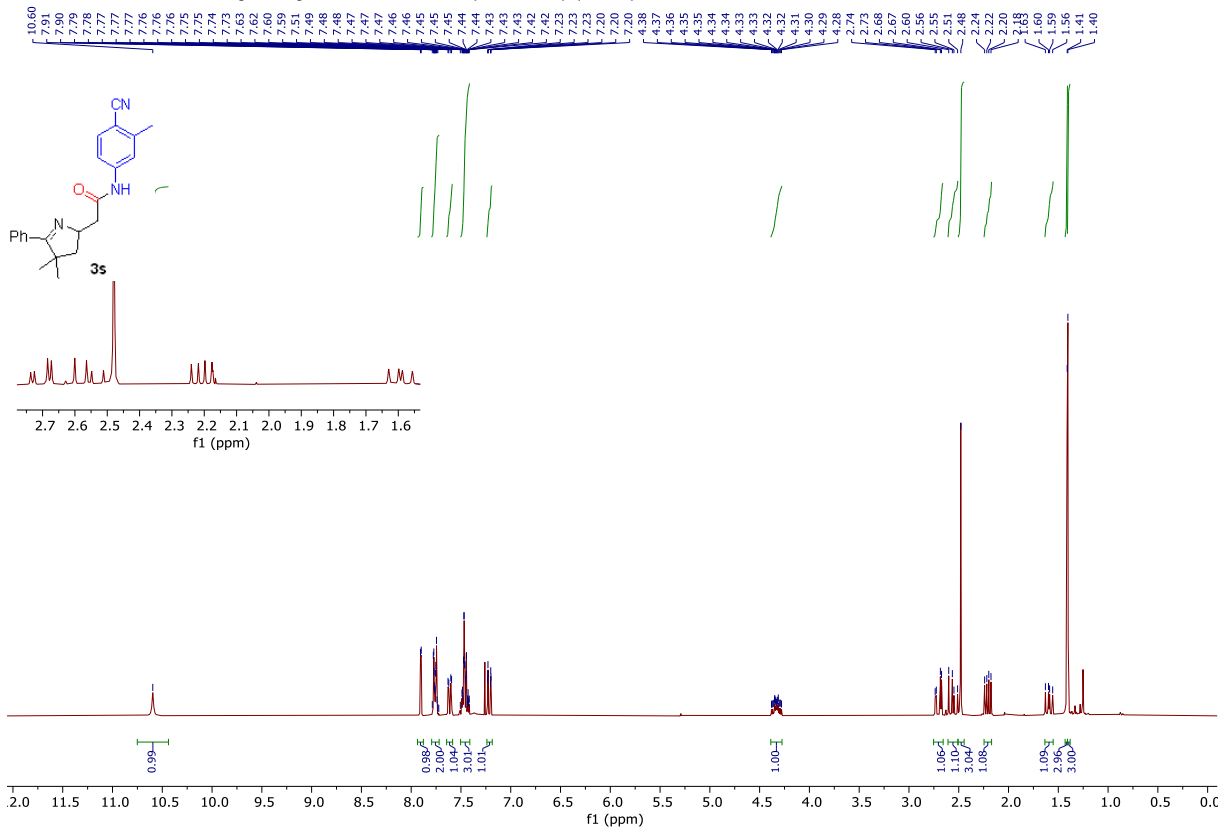

200409.f355.11.fid — Youcan Zhang YZhang-3-43 — C13CPD CDCl3 {C:\Bruker\TopSpin3.6.0} 2004 55 — 75.49MHz

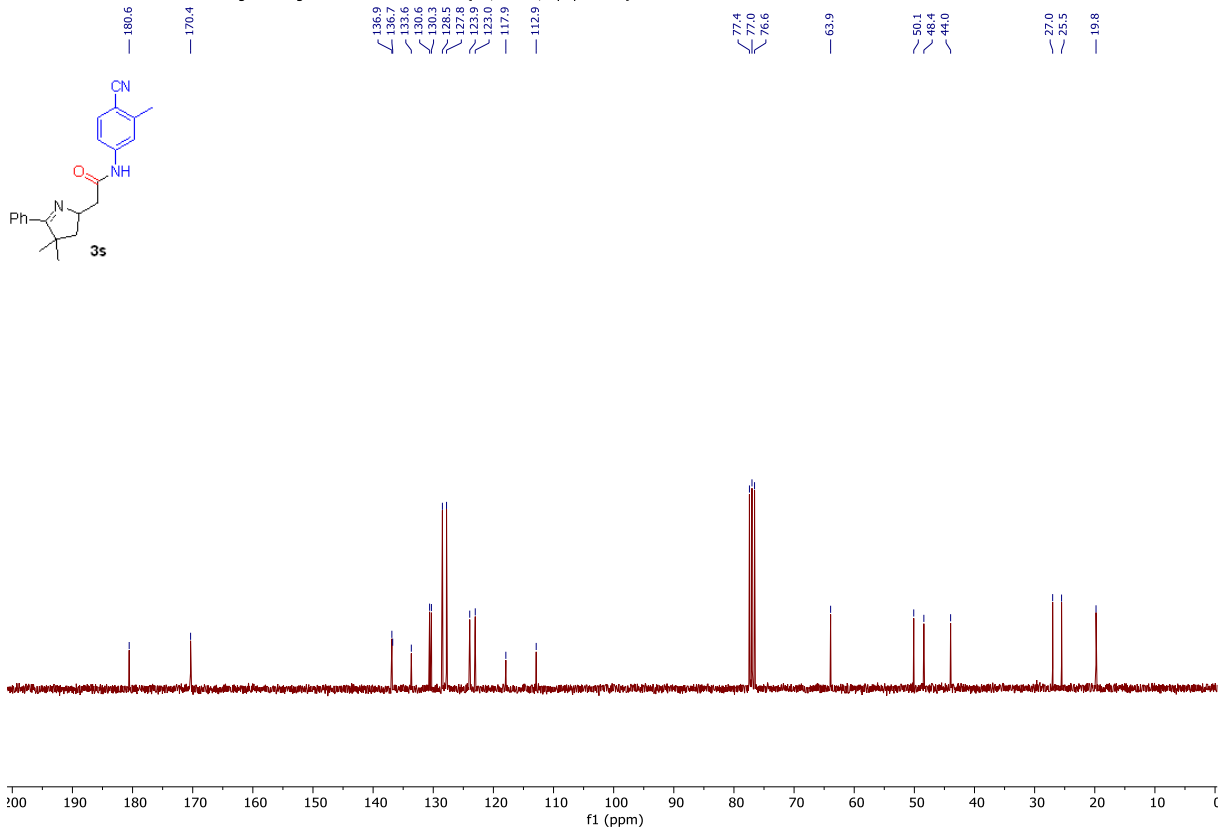

200423.f319.10.fid — Youcan Zhang YZhang-3-65 — PROTON CDCl3 {C:\Bruker\TopSpin3.6.0} 2004 19 — 300.20MHz

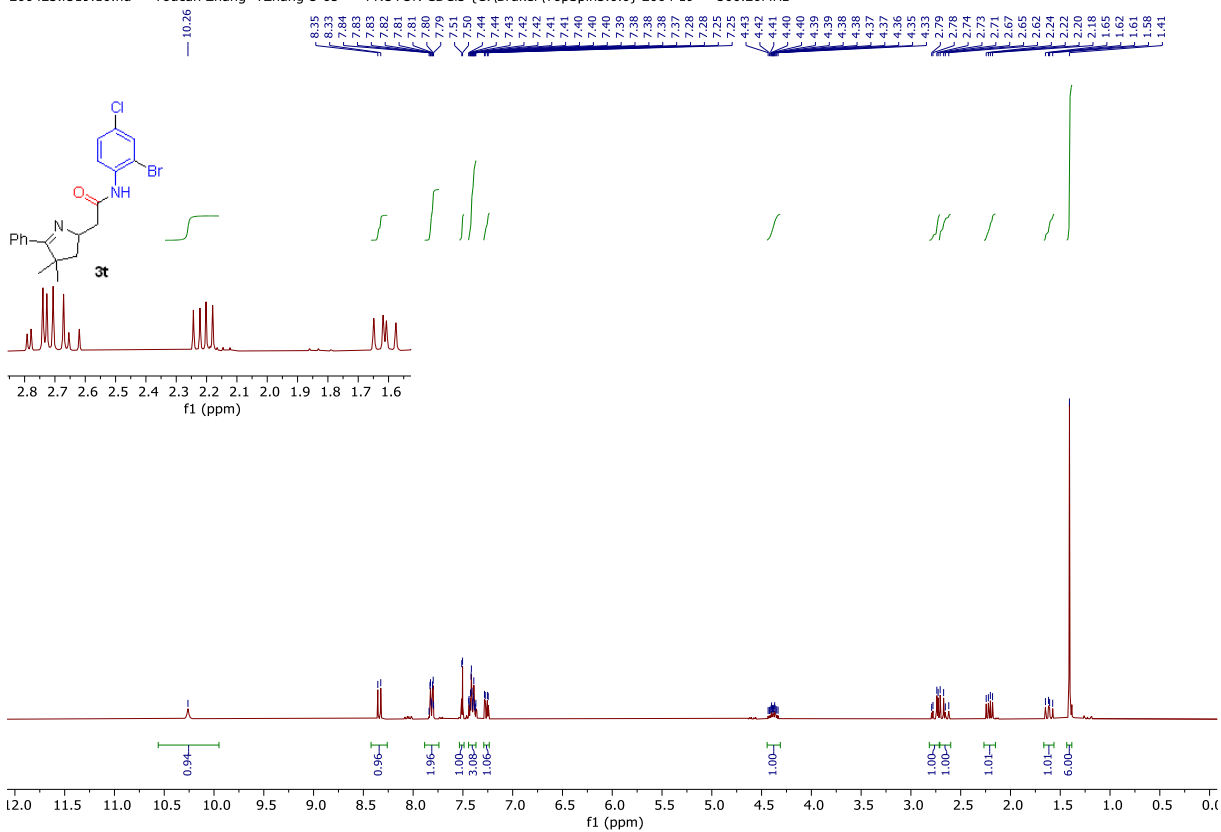

200423.f319.11.fid — Youcan Zhang YZhang-3-65 — C13CPD CDCl3 {C:\Bruker\TopSpin3.6.0} 2004 19 — 75.49MHz

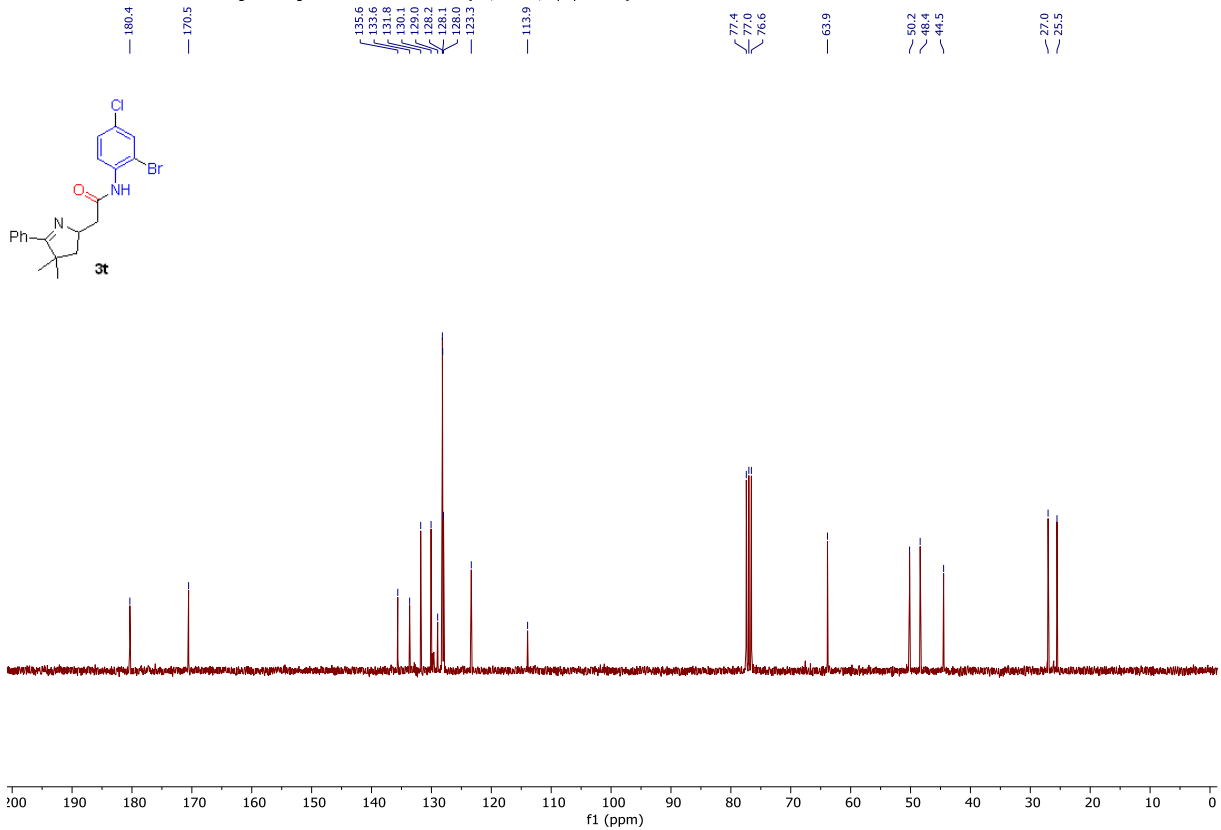

200424.f365.10.fid — Youcan Zhang YZhang-3-109 — PROTON CDCl3 {C:\Bruker\TopSpin3.6.0} 2004 5 — 300.20MHz

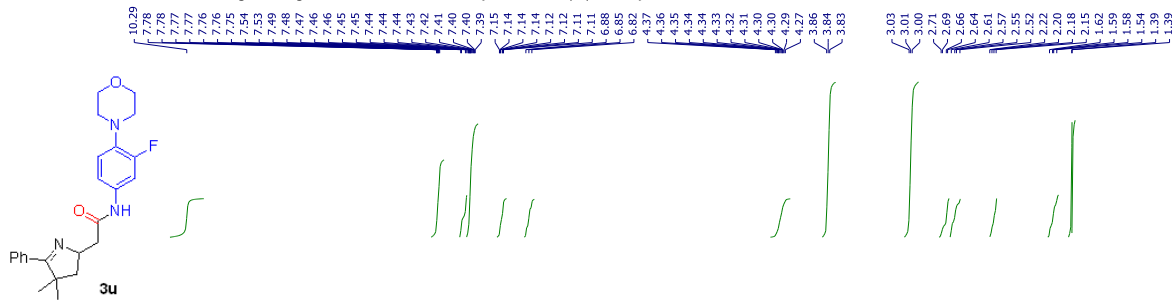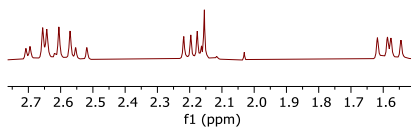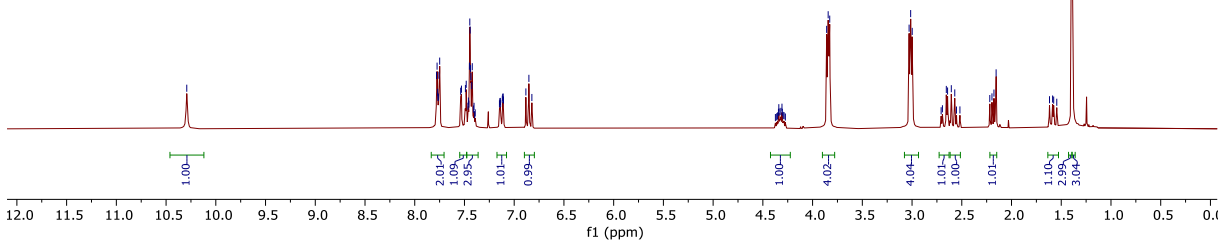

200424.f365.11.fid — Youcan Zhang YZhang-3-109 — C13CPD CDCl3 {C:\Bruker\TopSpin3.6.0} 2004 5 — 75.49MHz

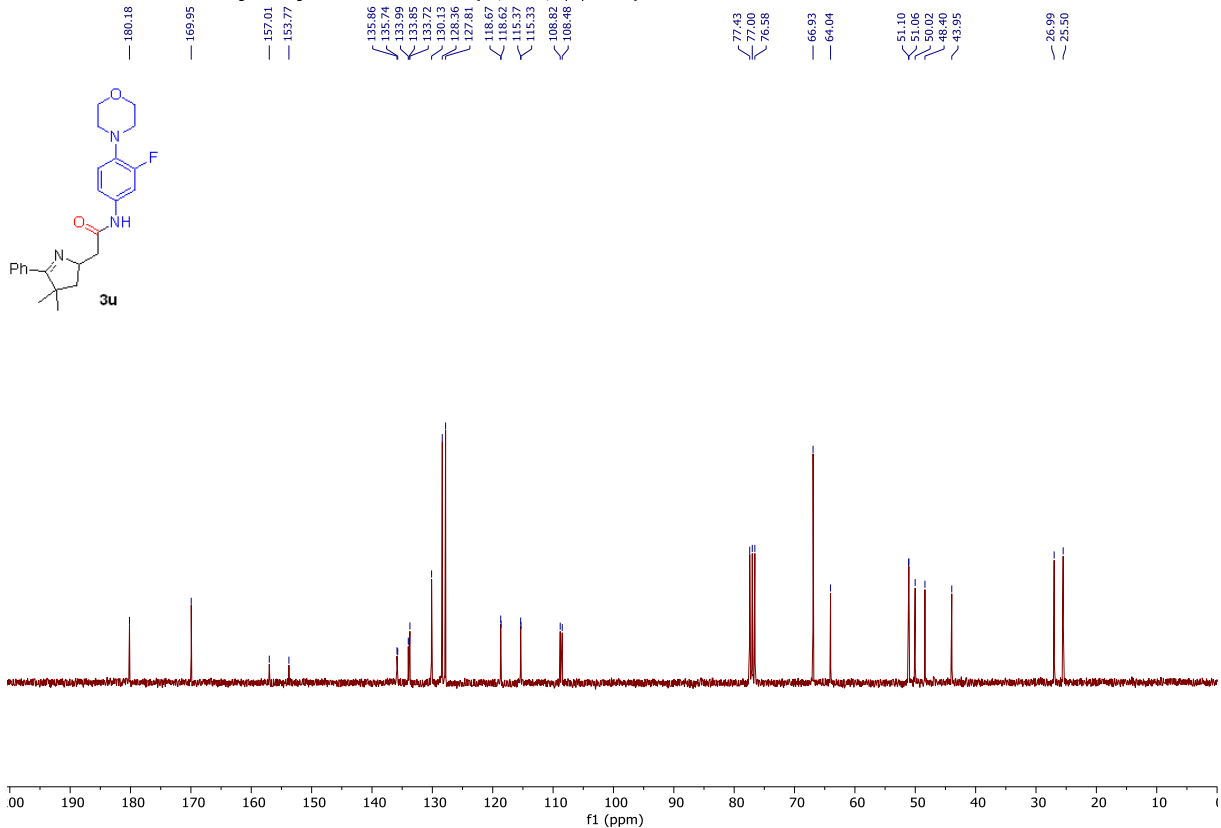

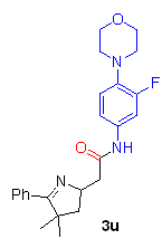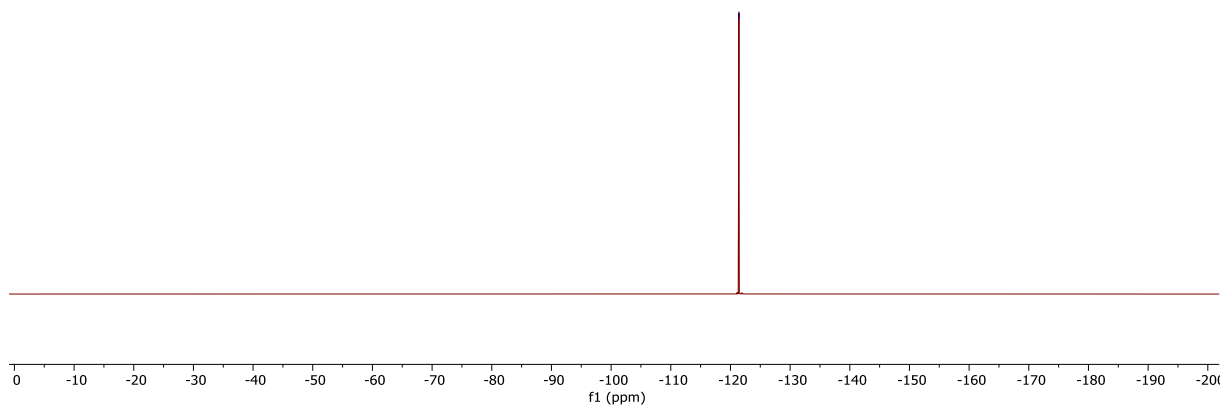

200508.f356.10.fid — Youcan Zhang YZhang-3-139 — PROTON CDCl3 {C:\Bruker\TopSpin3.6.0} 2005 56 — 300.20MHz

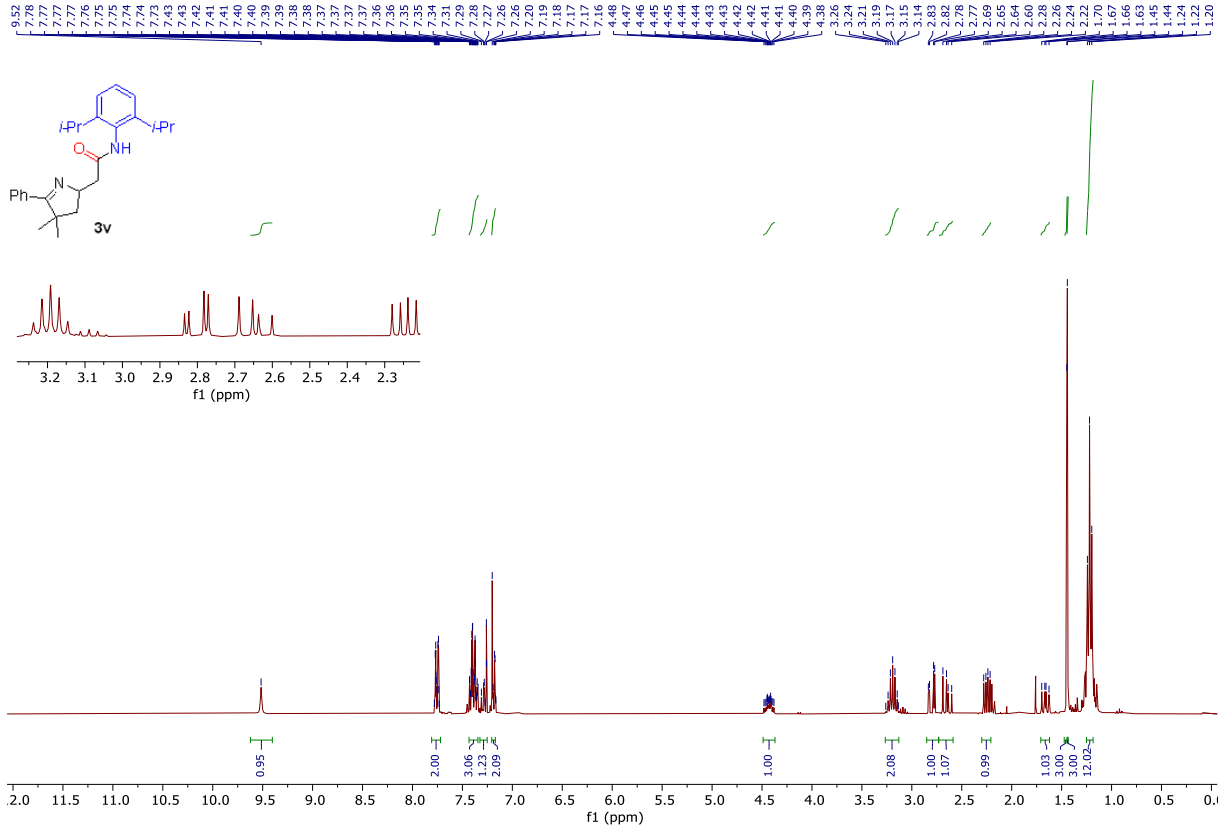

200508.f356.11.fid — Youcan Zhang YZhang-3-139 — C13CPD CDCl3 {C:\Bruker\TopSpin3.6.0} 2005 56 — 75.49MHz

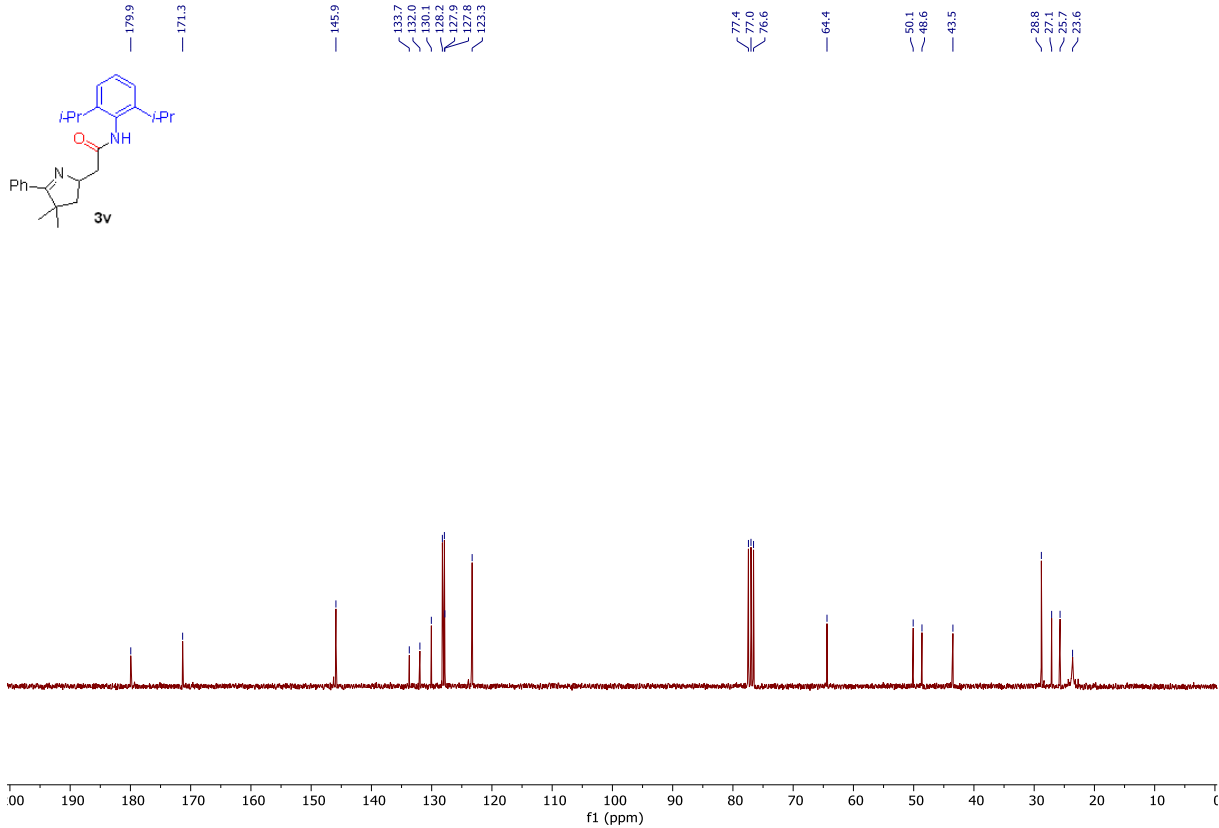



200527.f334.10.fid — Youcanzhang YZhang-3-207 — PROTON CDCl3 {C:\Bruker\TopSpin3.6.0} 2005 34 — 300.20MHz

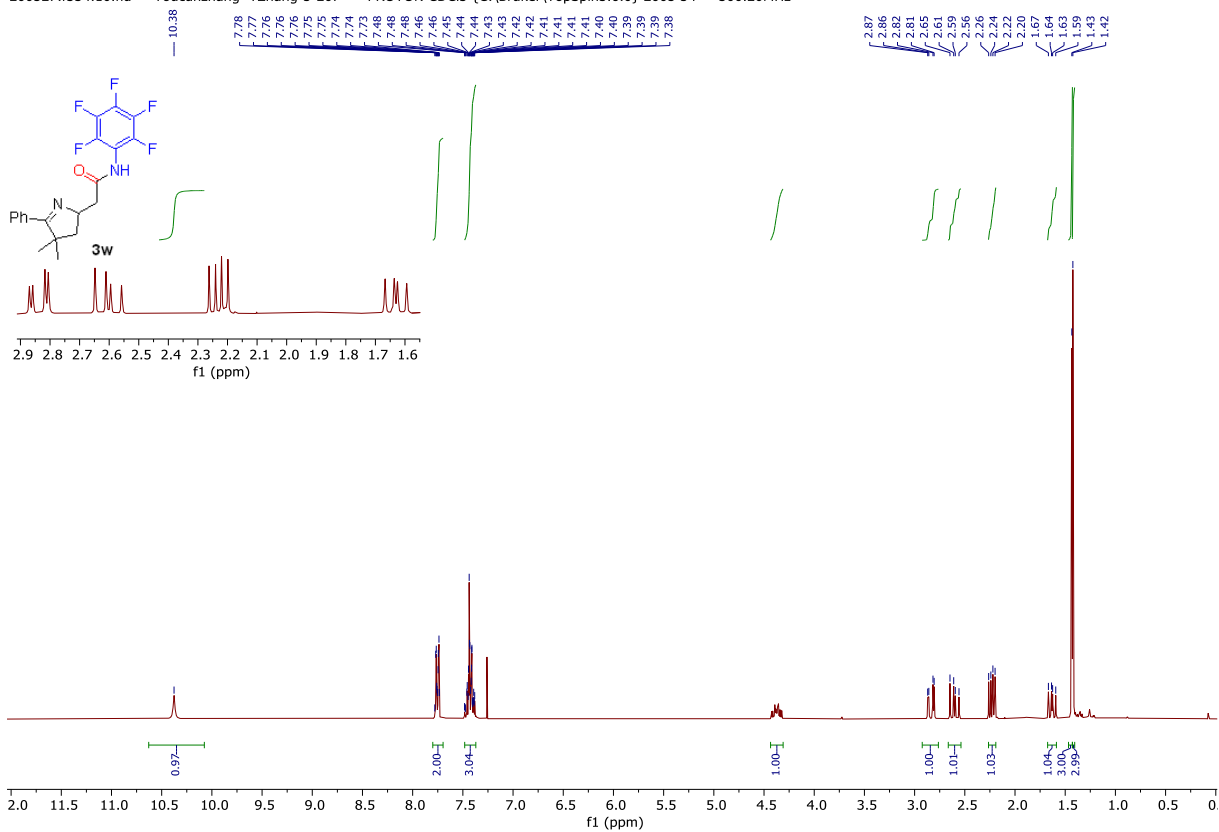

200527.f334.11.fid — Youcanzhang YZhang-3-207 — C13CPD CDCl3 {C:\Bruker\TopSpin3.6.0} 2005 34 — 75.49MHz

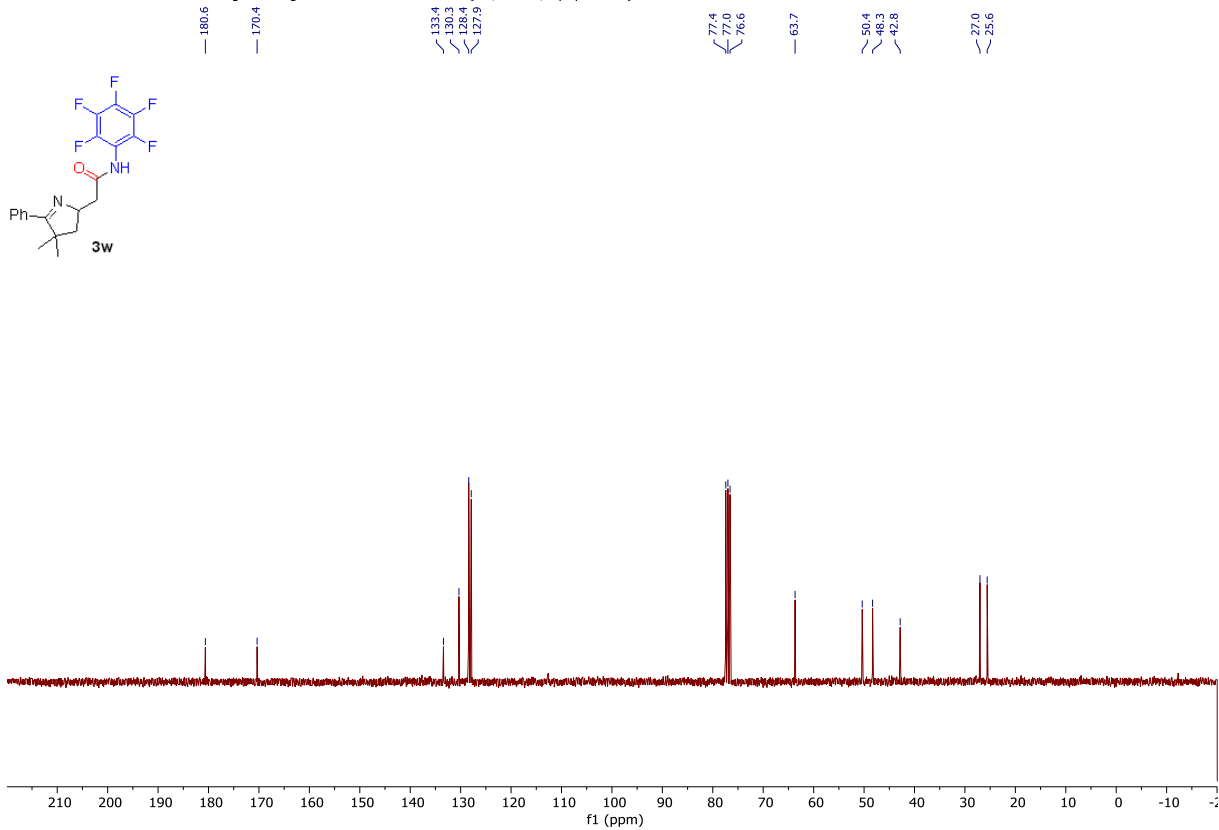

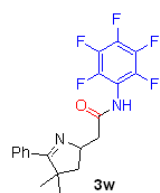

144.7  
144.8  
144.8  
144.8  
144.8  
144.8  
144.8  
144.9  
158.3  
158.4  
158.4  
162.9  
162.9  
163.0  
163.0  
163.0  
163.0  
163.1

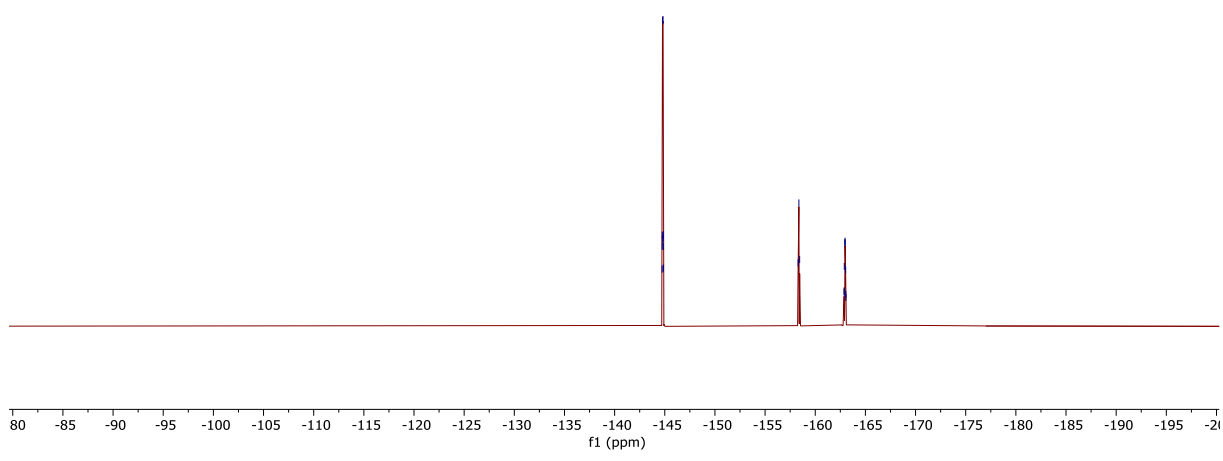

200415.f344.10.fid — Youcan Zhang YZhang-3-5-2 — PROTON CDCl3 {C:\Bruker\TopSpin3.6.0} 2004 44 — 300.20MHz

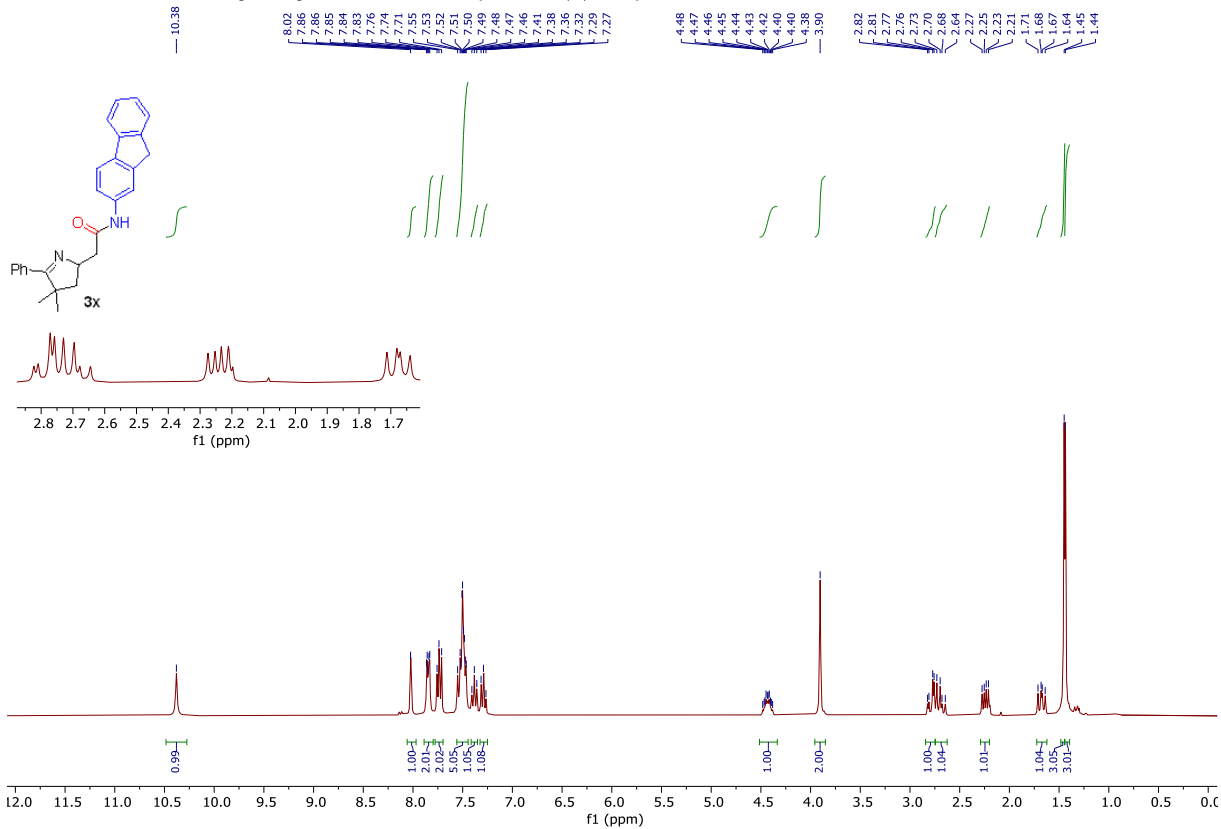

200415.f344.11.fid — Youcan Zhang YZhang-3-5-2 — C13CPD CDCl3 {C:\Bruker\TopSpin3.6.0} 2004 44 — 75.49MHz

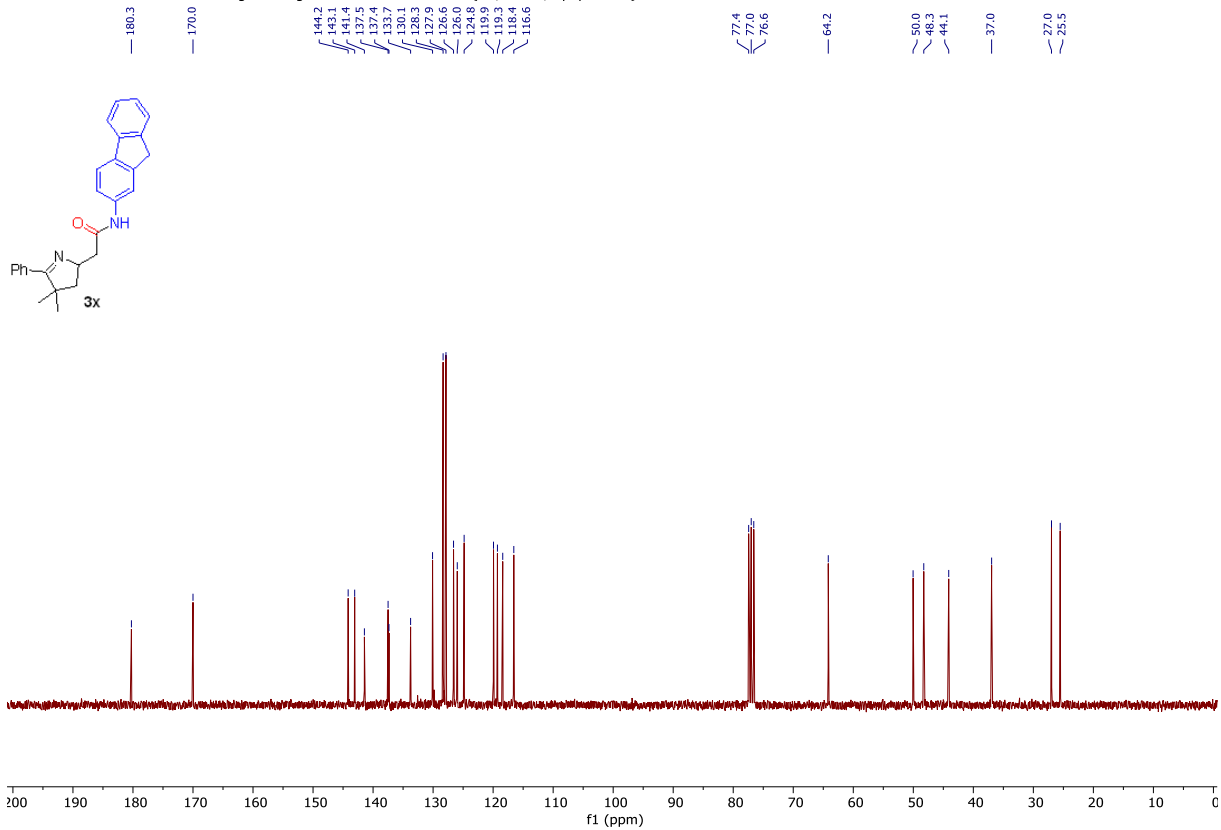

200424.f362.10.fid — Youcan Zhang YZhang-3-101 — PROTON CDCl3 {C:\Bruker\TopSpin3.6.0} 2004 2 — 300.20MHz

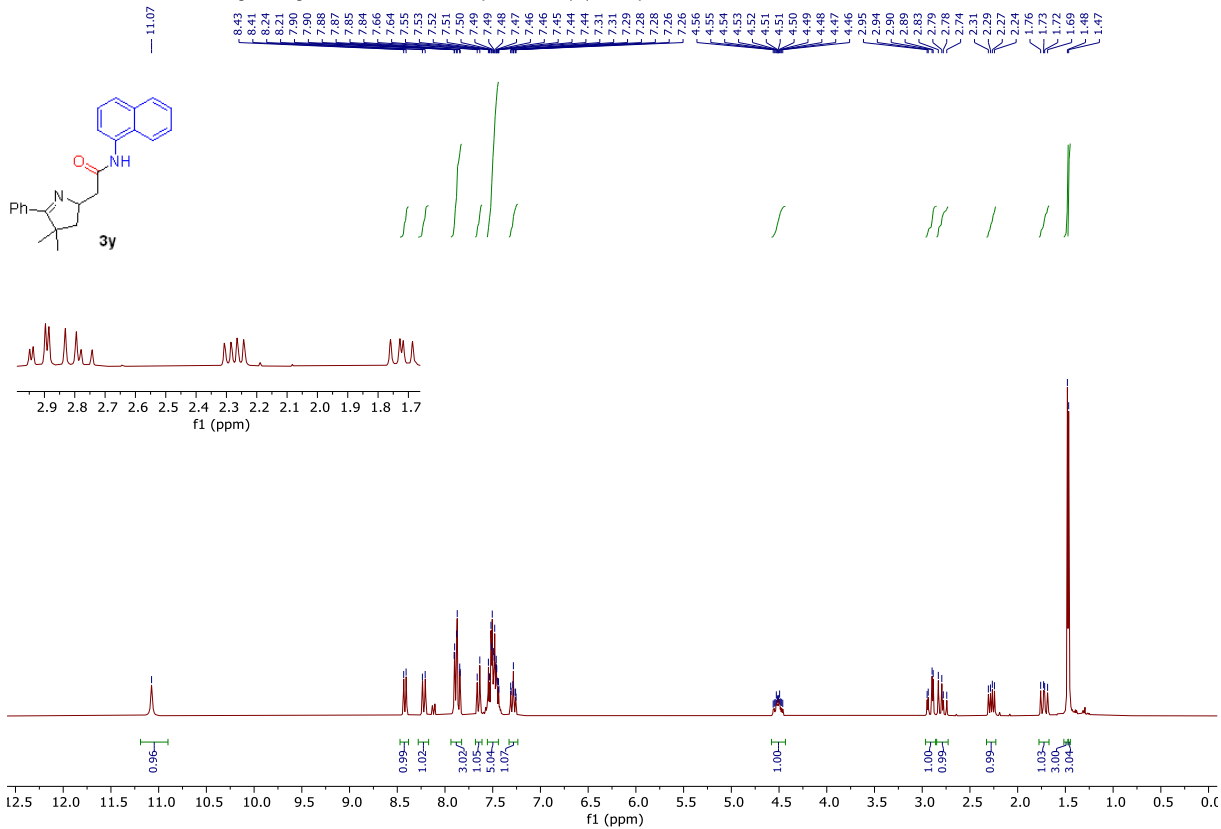

200424.f362.11.fid — Youcan Zhang YZhang-3-101 — C13CPD CDCl3 {C:\Bruker\TopSpin3.6.0} 2004 2 — 75.49MHz

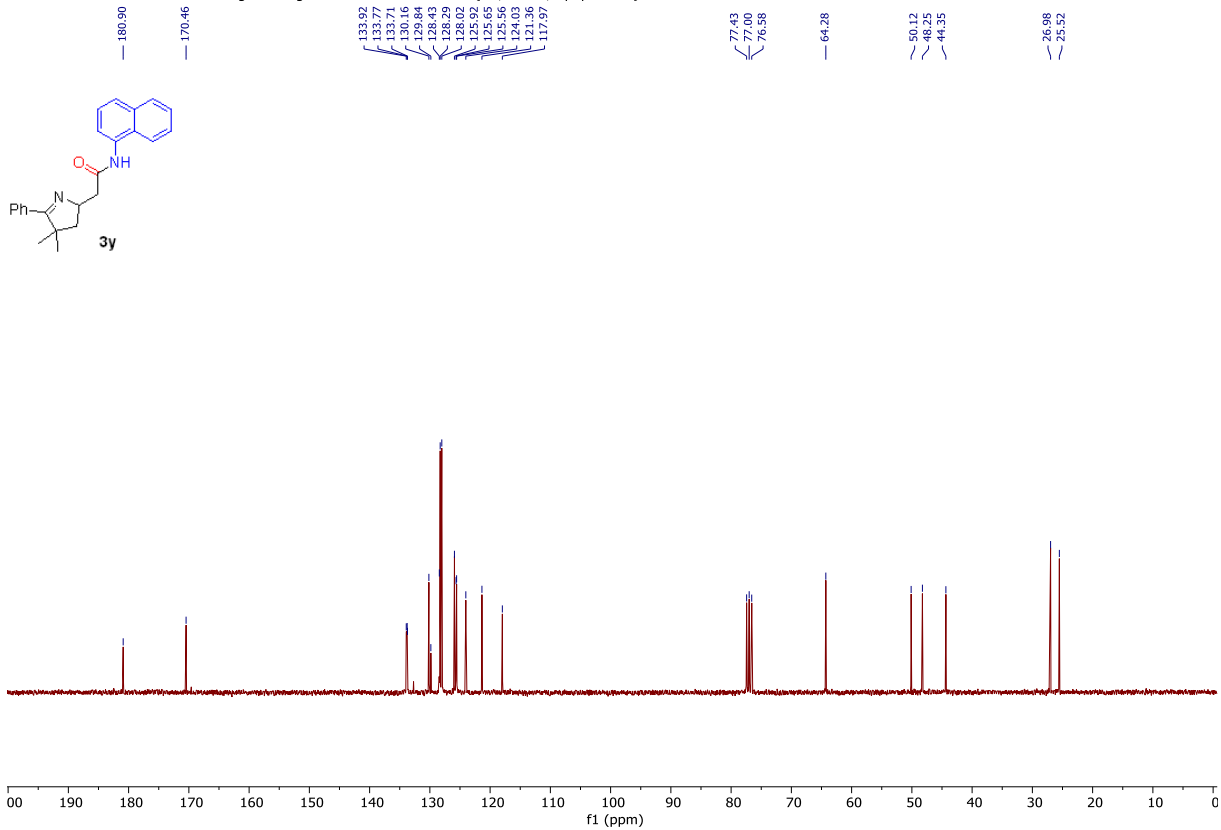

200423.f322.10.fid — Youcan Zhang YZhang-3-108 — PROTON CDCl3 {C:\Bruker\TopSpin3.6.0} 2004 22 — 300.20MHz

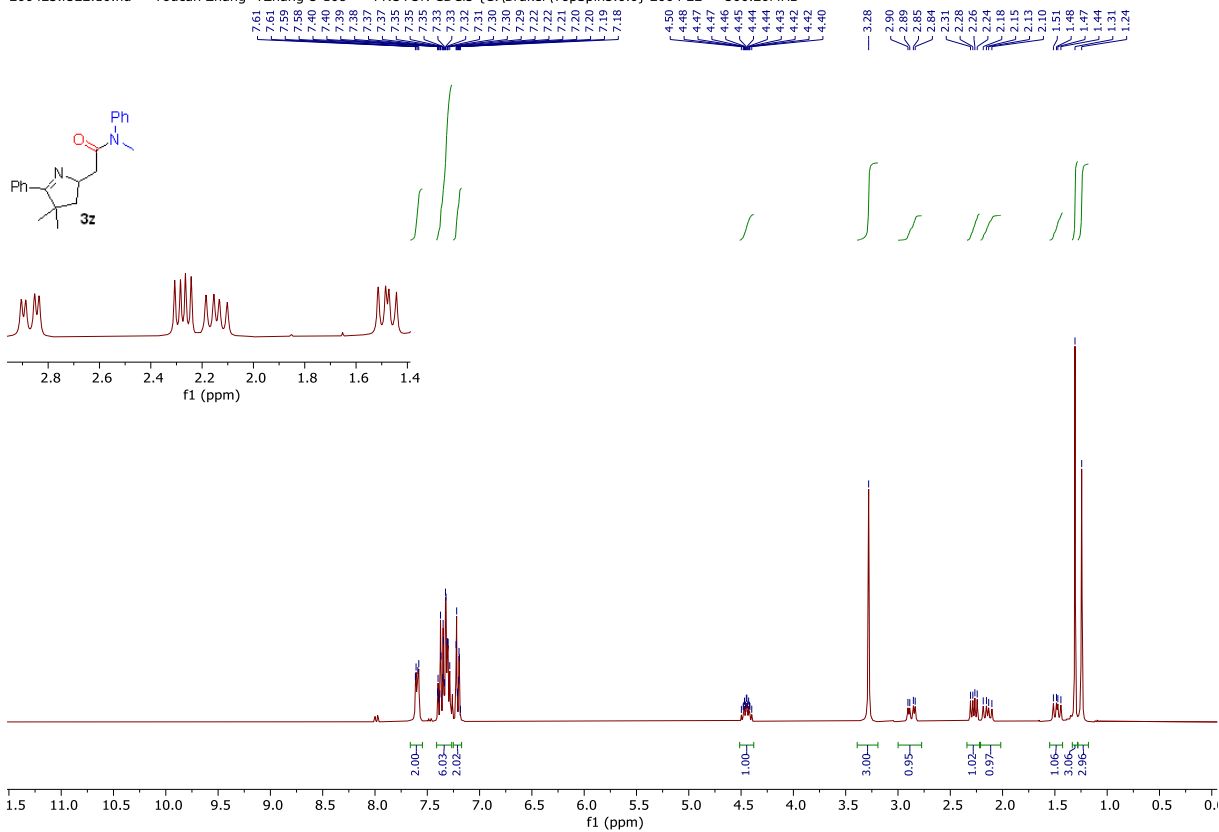

200423.f322.11.fid — Youcan Zhang YZhang-3-108 — C13CPD CDCl3 {C:\Bruker\TopSpin3.6.0} 2004 22 — 75.49MHz

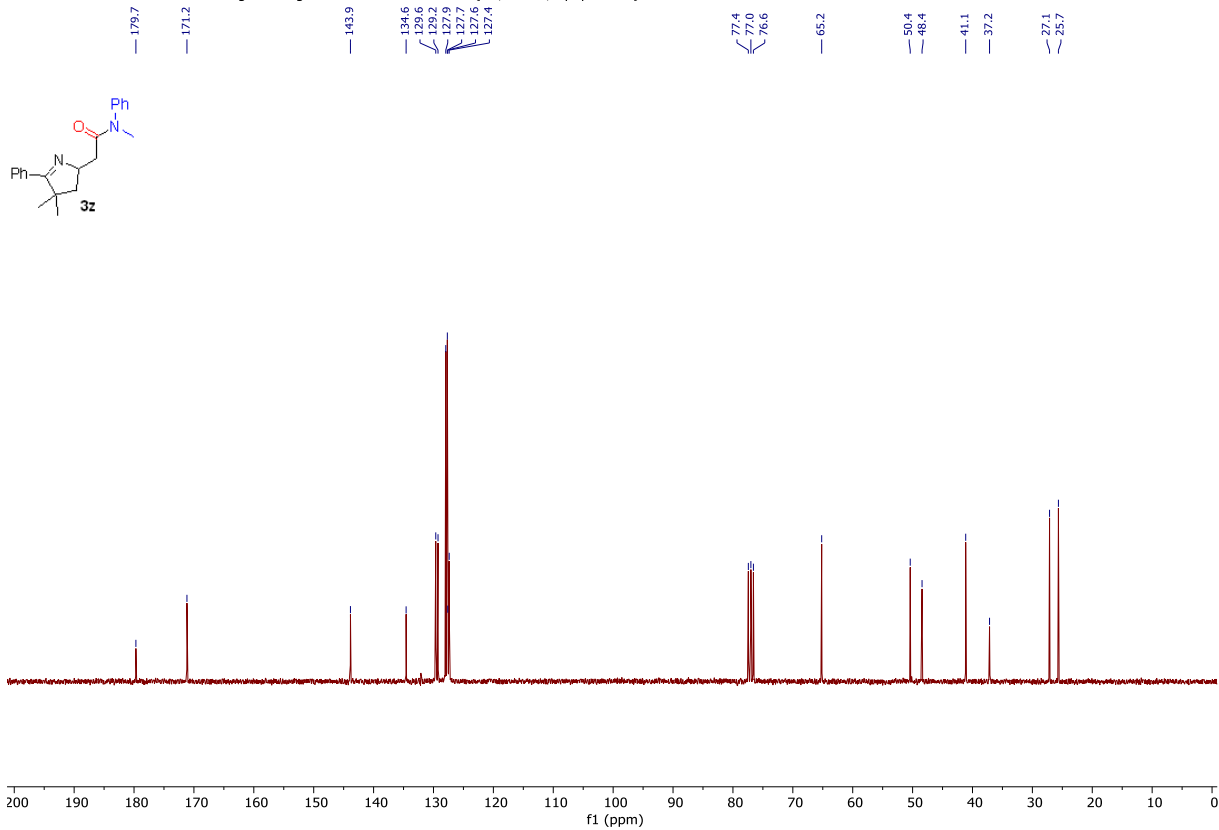

200423.f323.10.fid — Youcan Zhang YZhang-3-105 — PROTON CDCl3 {C:\Bruker\TopSpin3.6.0} 2004 23 — 300.20MHz

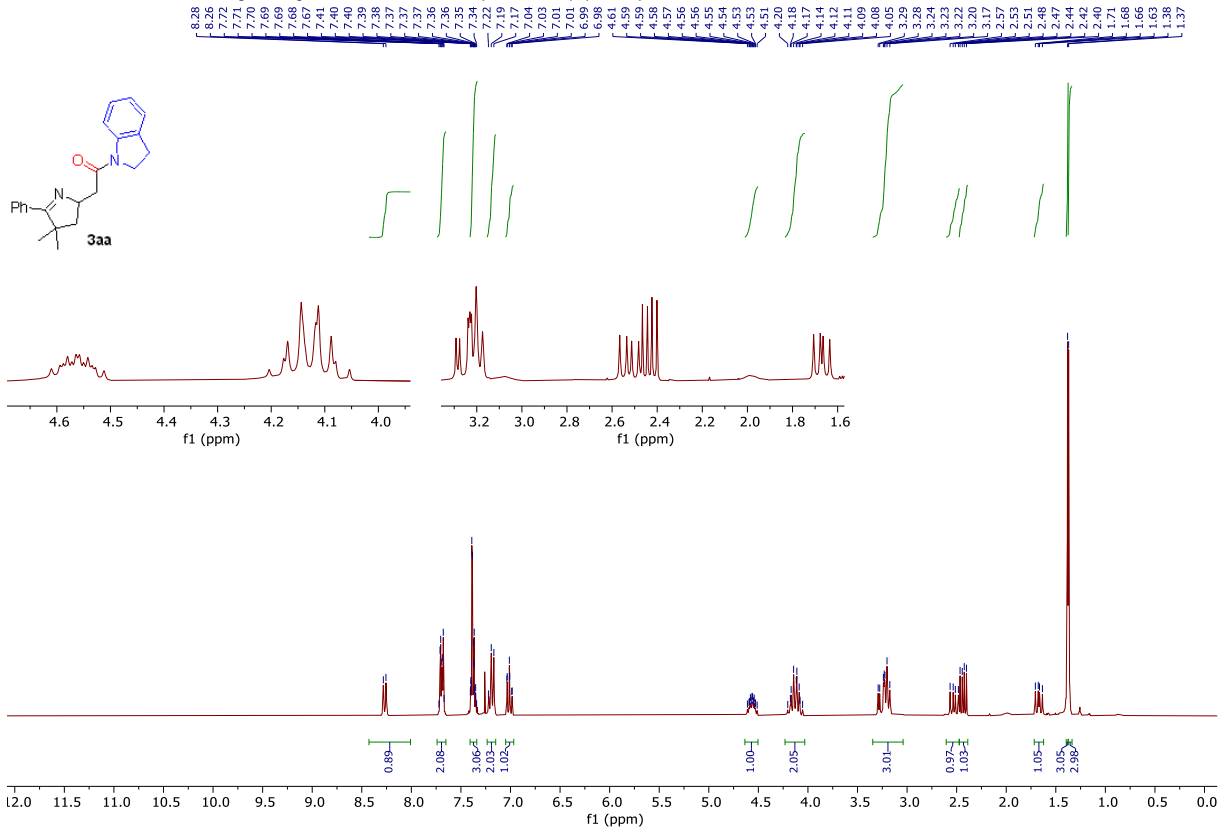

200423.f323.11.fid — Youcan Zhang YZhang-3-105 — C13CPD CDCl3 {C:\Bruker\TopSpin3.6.0} 2004 23 — 75.49MHz

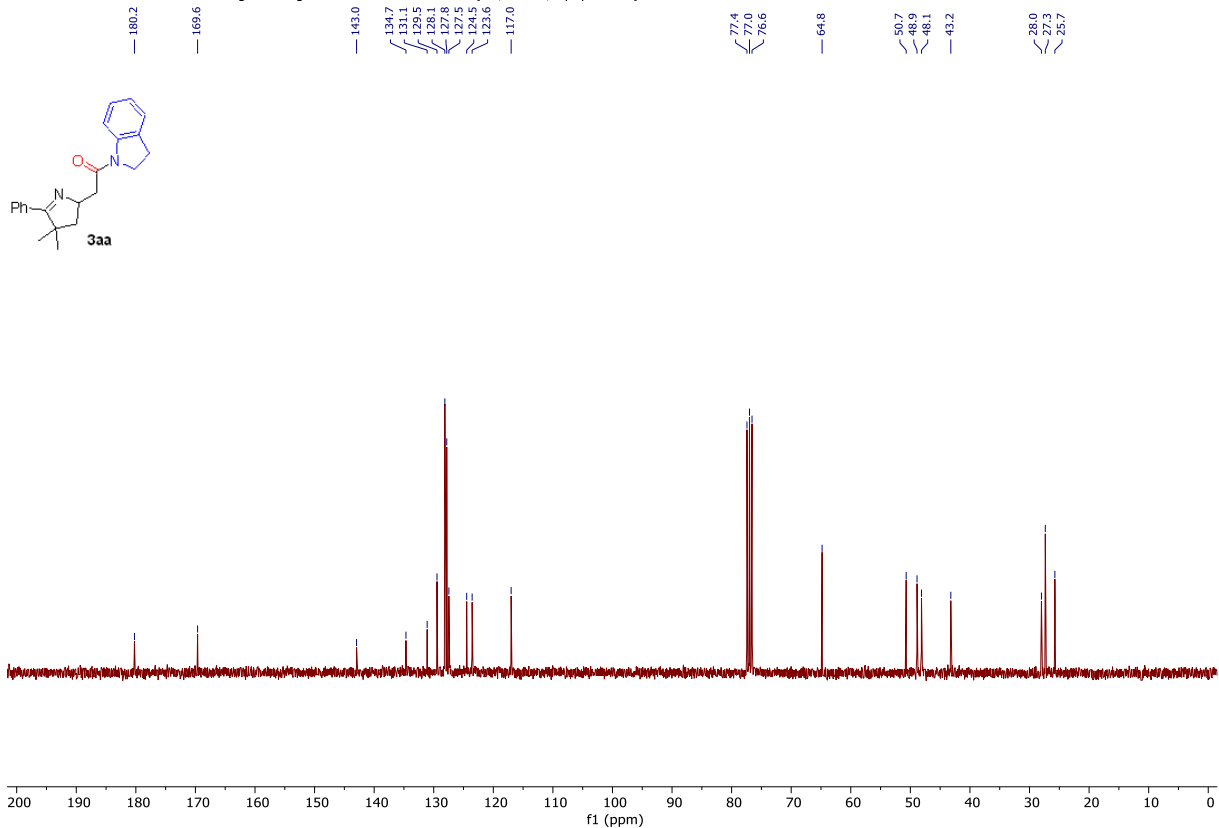

200403.f332.10.fid — Youcan Zhang YZhang-3-23 — PROTON CDCl3 {C:\Bruker\TopSpin3.6.0} 2004 32 — 300.20MHz

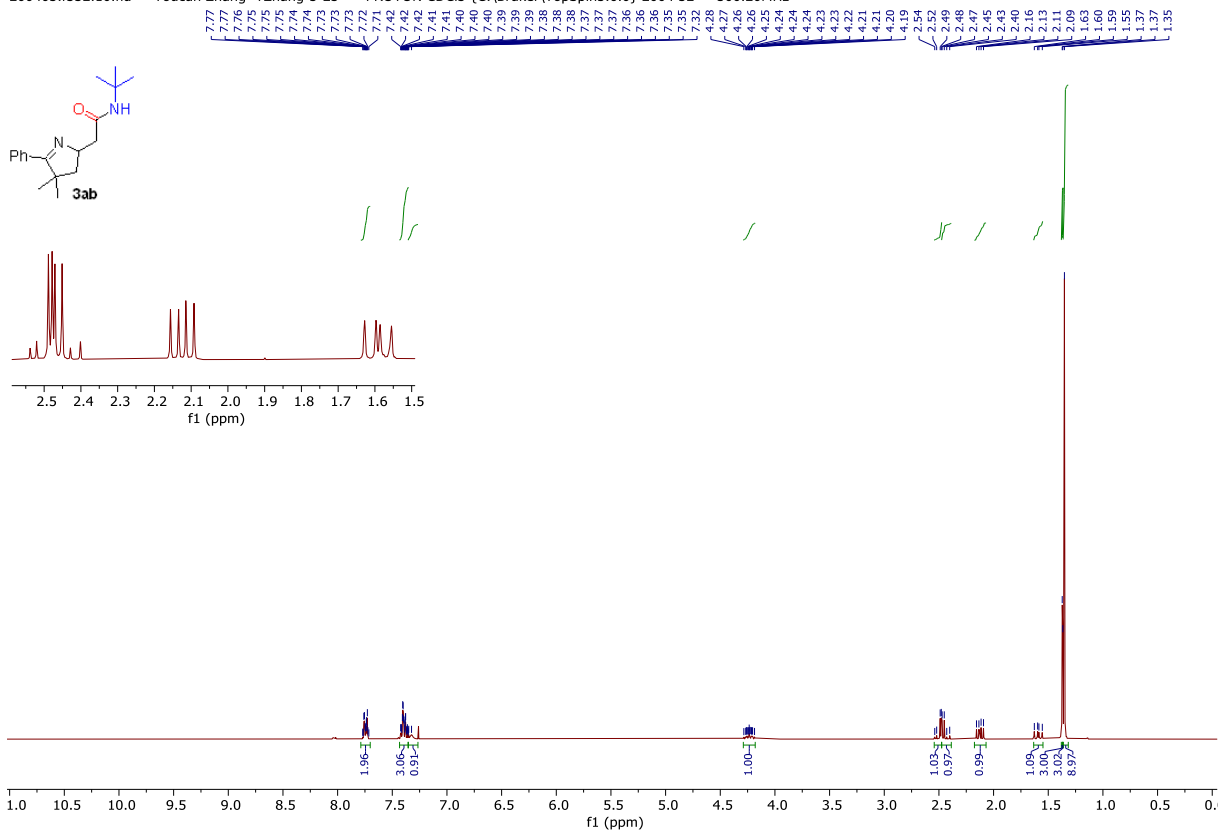

200403.f332.11.fid — Youcan Zhang YZhang-3-23 — C13CPD CDCl3 {C:\Bruker\TopSpin3.6.0} 2004 32 — 75.49MHz

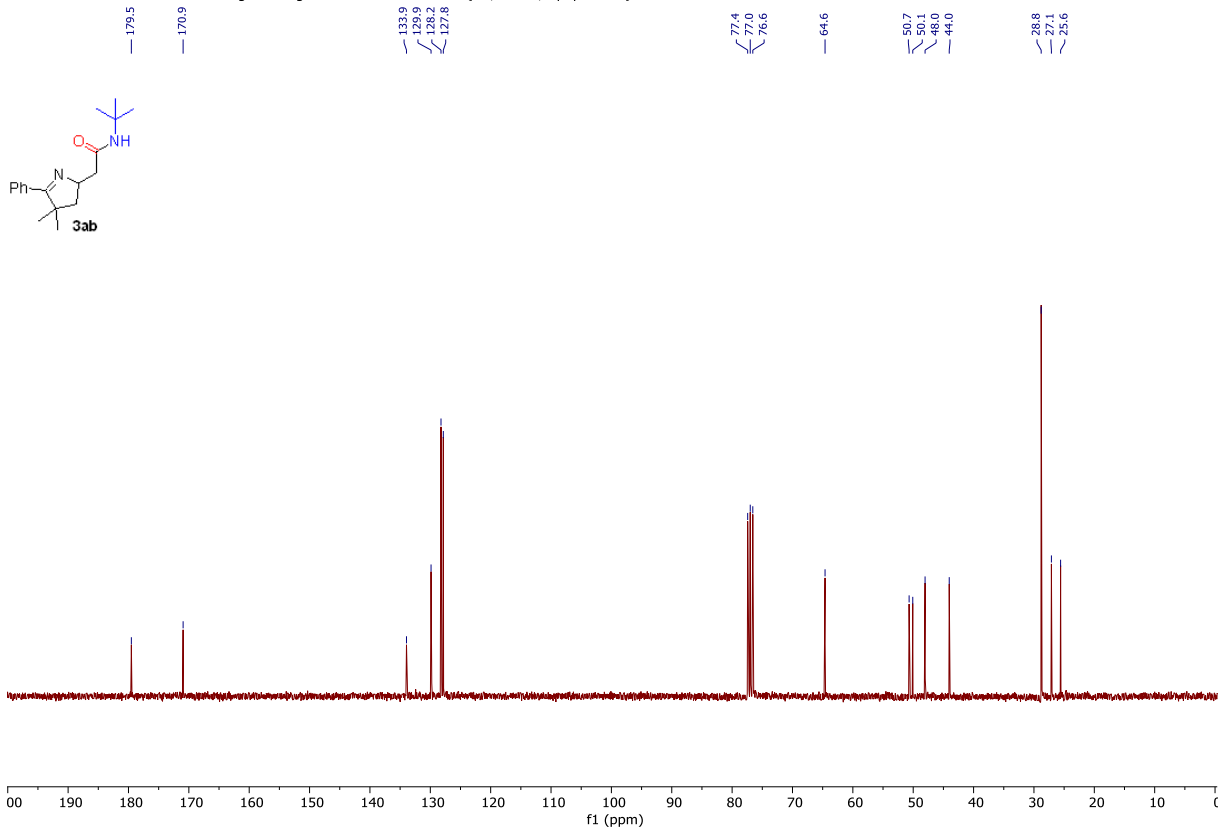





200406.f348.10.fid — Youcan Zhang YZhang-3-36 — PROTON CDCl3 {C:\Bruker\TopSpin3.6.0} 2004 48 — 300.20MHz

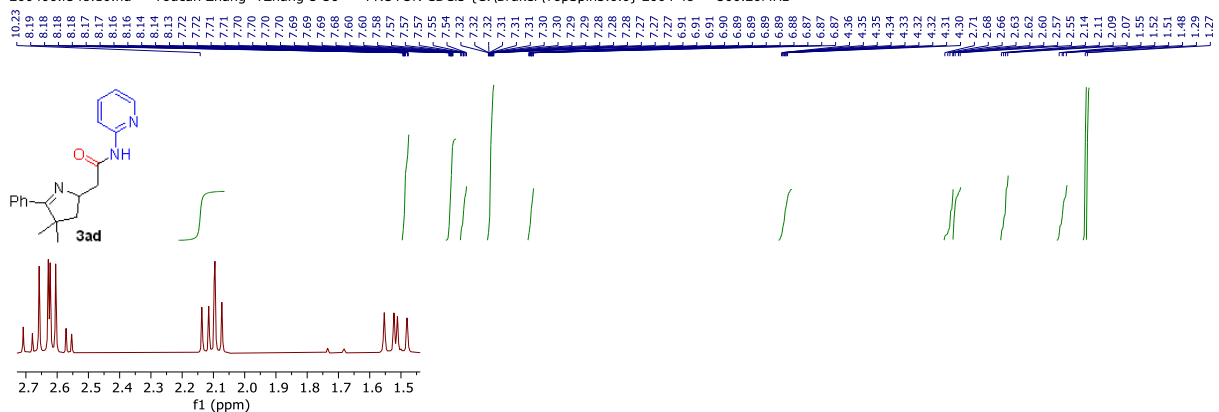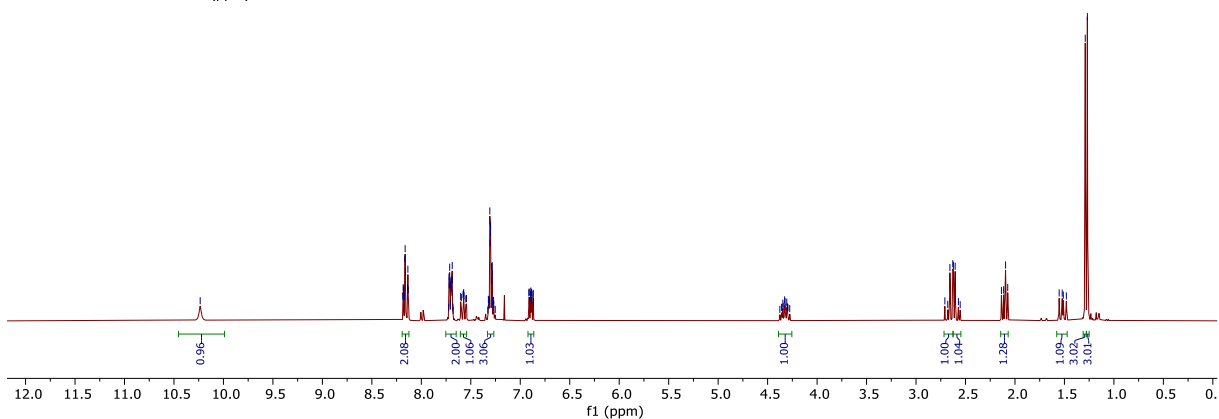

200406.f348.11.fid — Youcan Zhang YZhang-3-36 — C13CPD CDCl3 {C:\Bruker\TopSpin3.6.0} 2004 48 — 75.49MHz

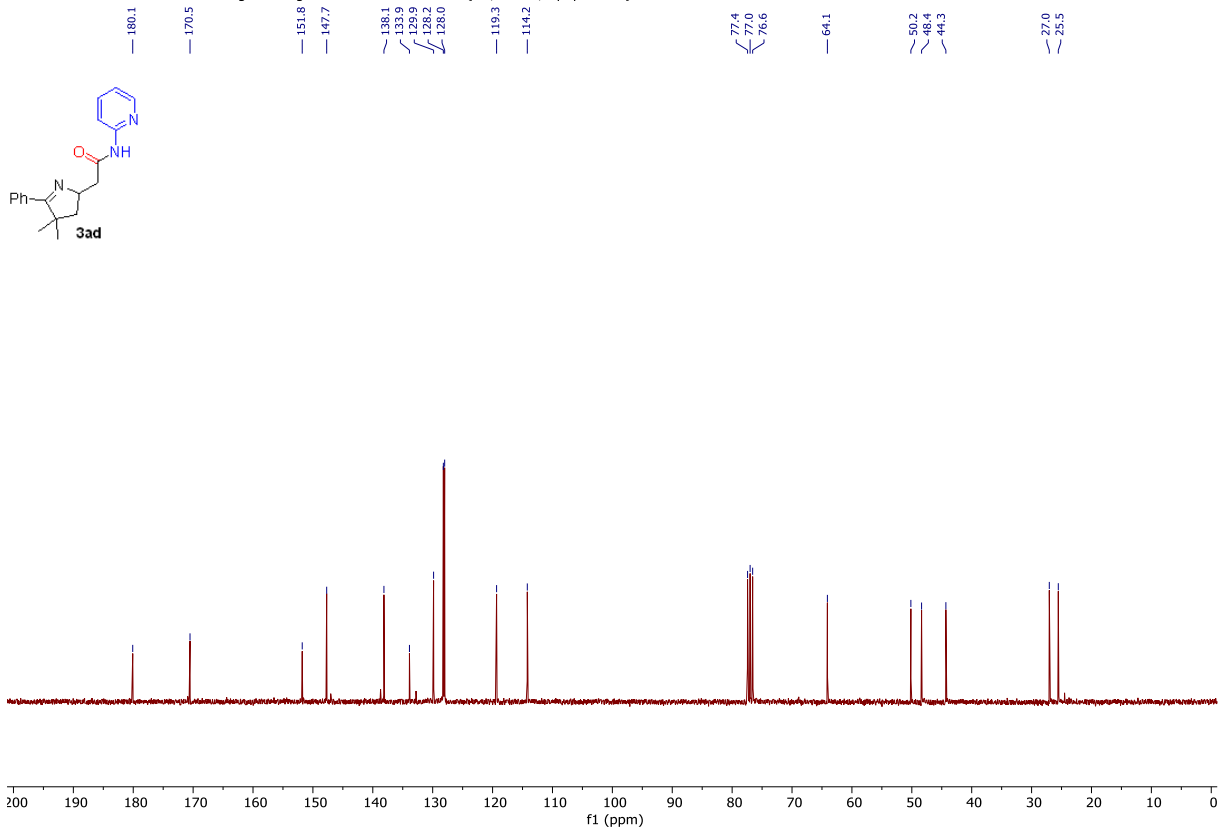

200423.f321.10.fid — Youcan Zhang YZhang-3-106 — PROTON CDCl3 {C:\Bruker\TopSpin3.6.0} 2004 21 — 300.20MHz

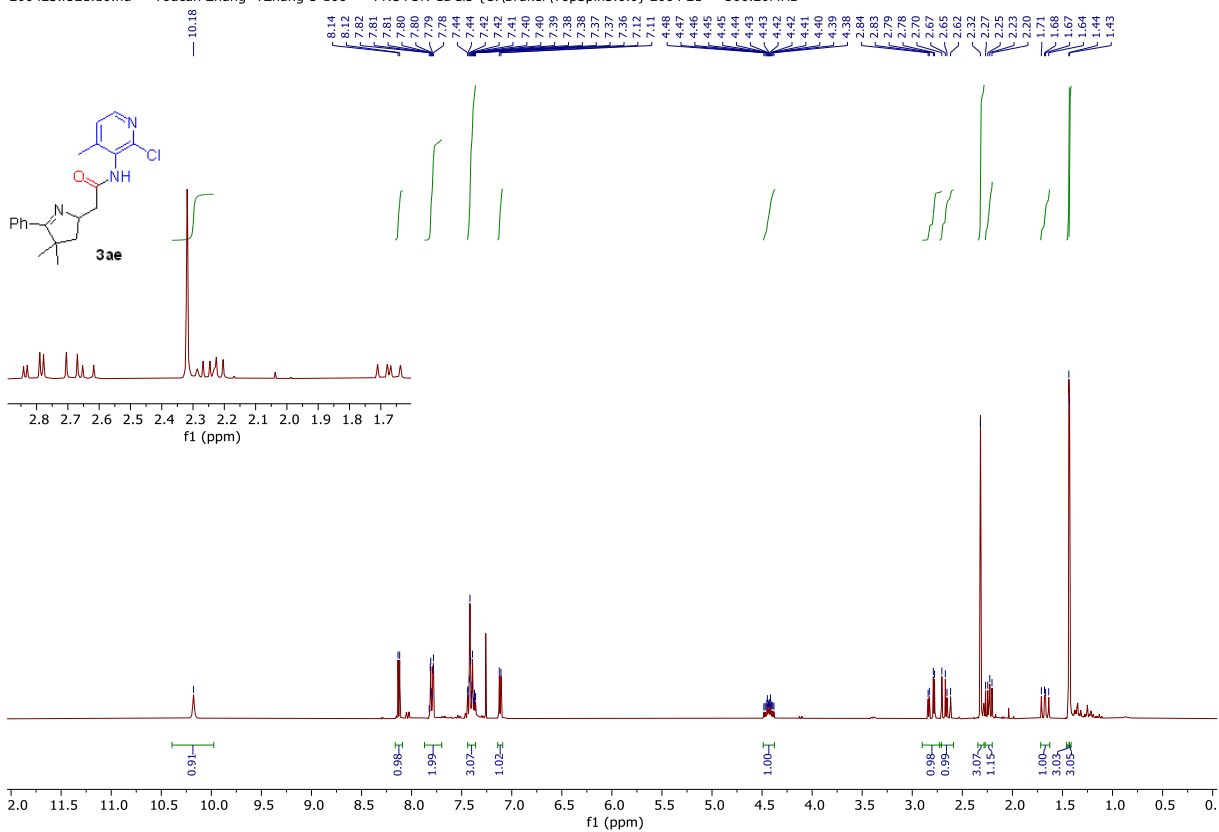

200423.f321.11.fid — Youcan Zhang YZhang-3-106 — C13CPD CDCl3 {C:\Bruker\TopSpin3.6.0} 2004 21 — 75.49MHz

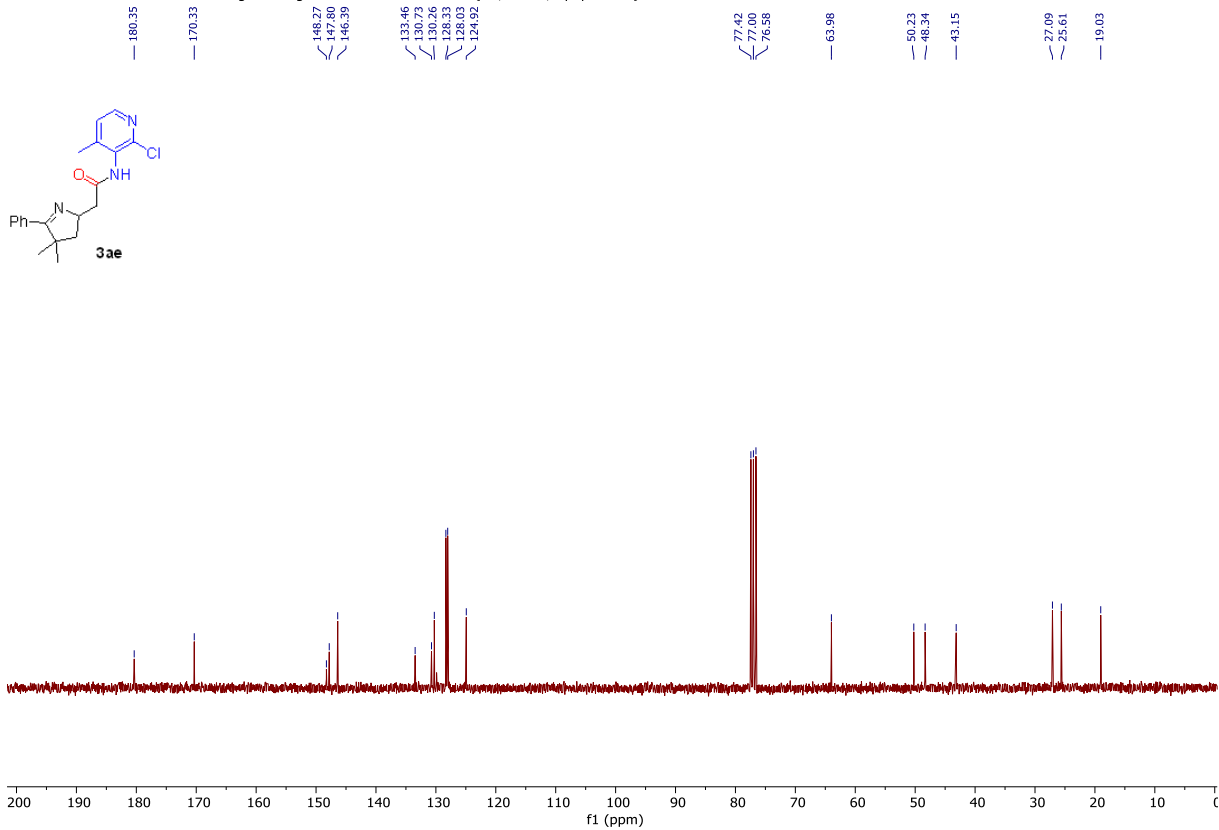

200423.f318.10.fid — Youcan Zhang YZhang-3-63 — PROTON CDCl3 {C:\Bruker\TopSpin3.6.0} 2004 18 — 300.20MHz

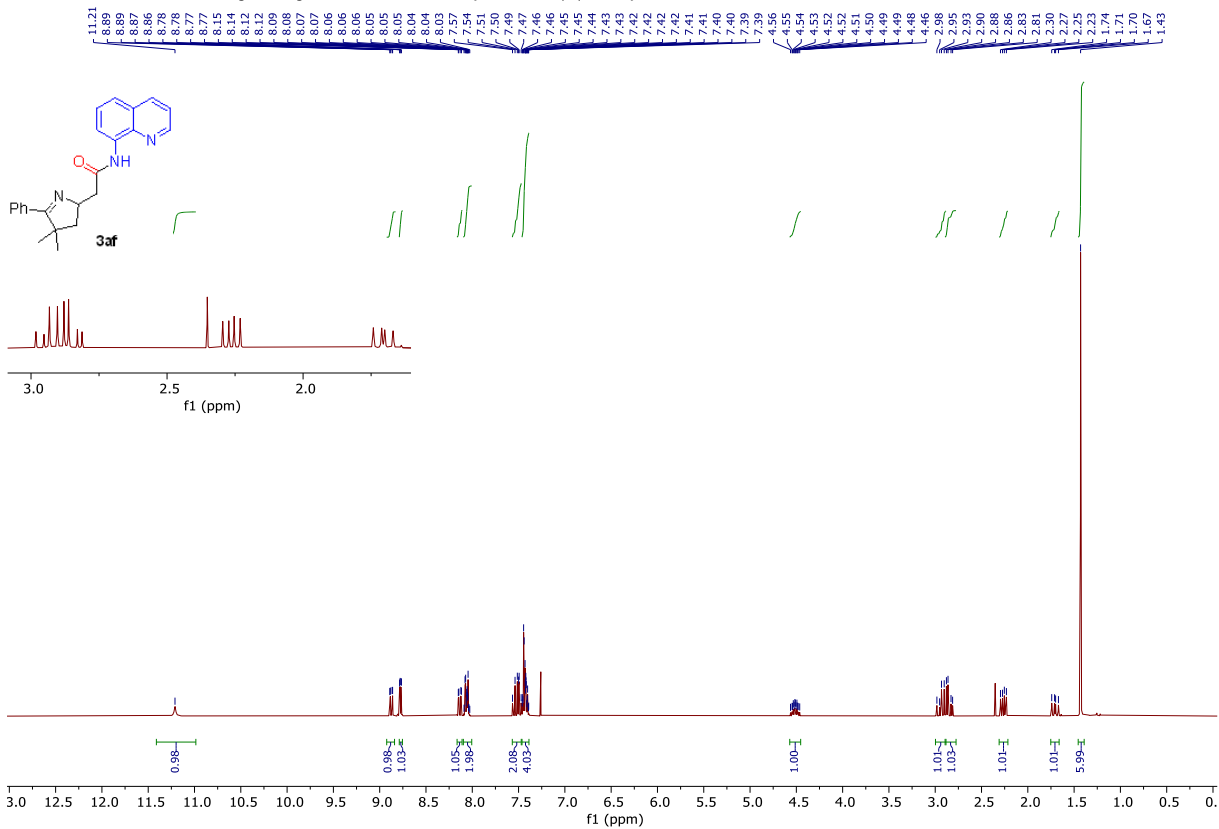

200423.f318.11.fid — Youcan Zhang YZhang-3-63 — C13CPD CDCl3 {C:\Bruker\TopSpin3.6.0} 2004 18 — 75.49MHz

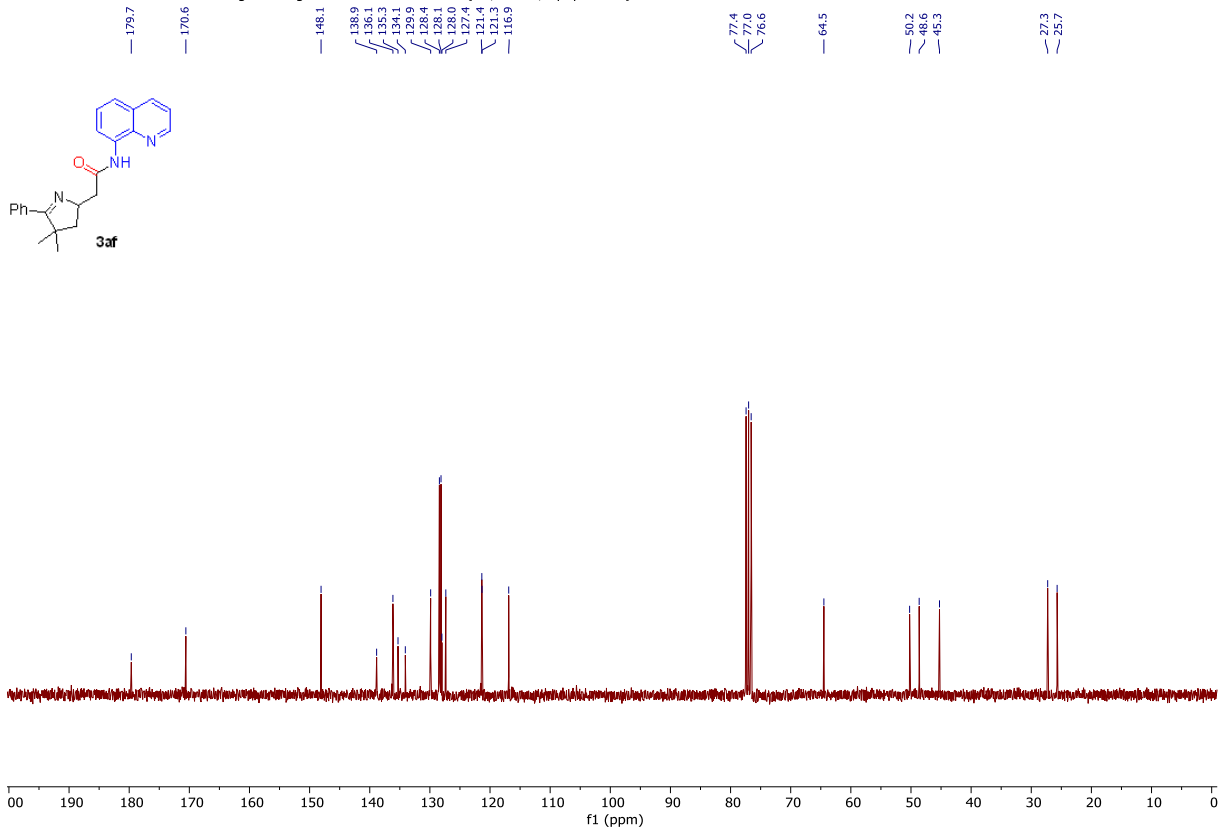

200506.f349.10.fid — Youcan Zhang YZhang-3-60 — PROTON CDCl3 {C:\Bruker\TopSpin3.6.0} 2005 49 — 300.20MHz

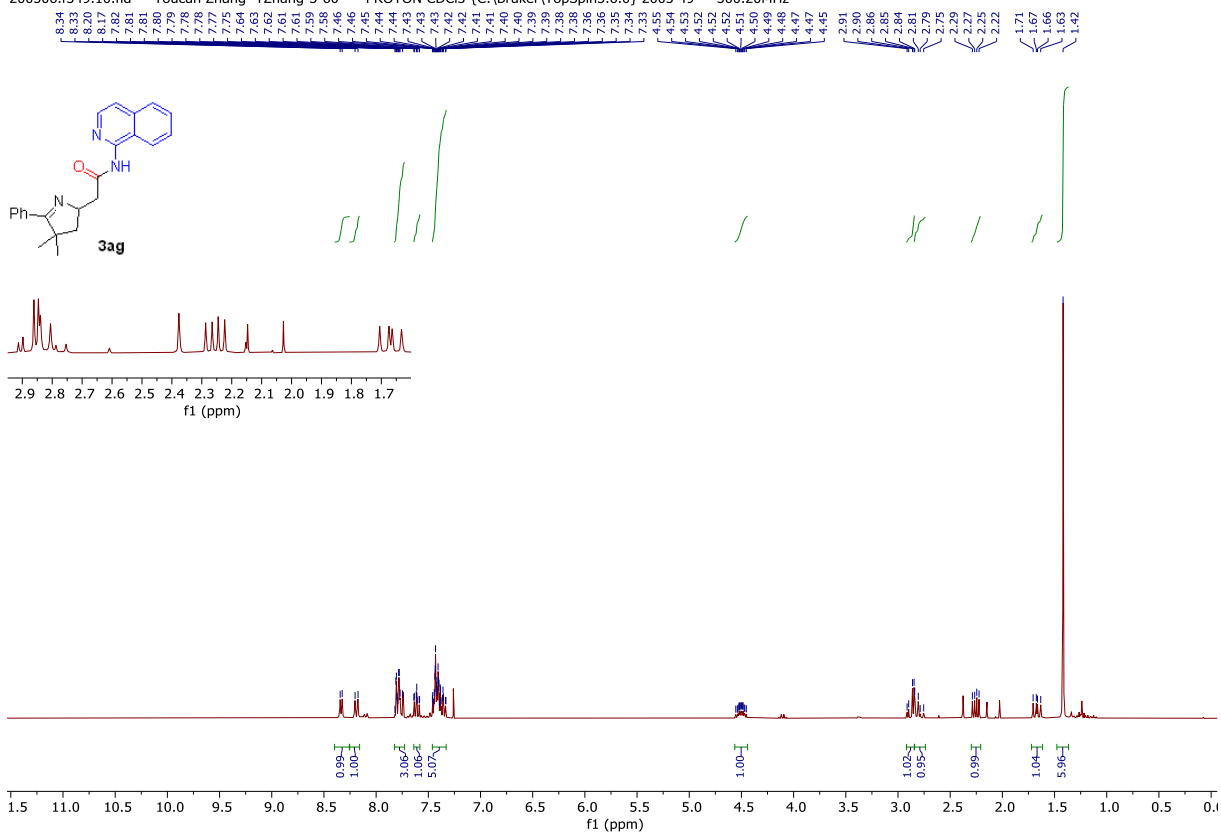

200506.f349.11.fid — Youcan Zhang YZhang-3-60 — C13CPD CDCl3 {C:\Bruker\TopSpin3.6.0} 2005 49 — 75.49MHz

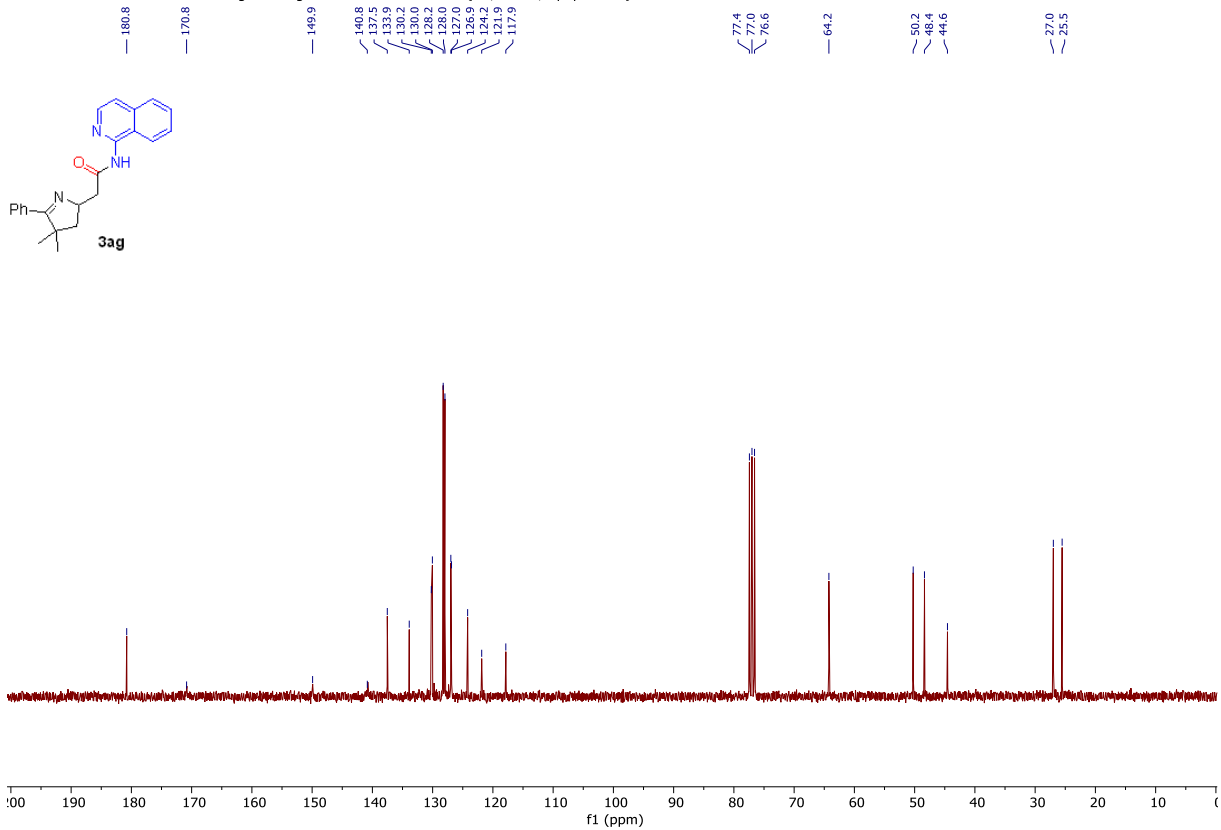

200421.f344.10.fid — Youcan Zhang YZhang-3-62 — PROTON CDCl3 {C:\Bruker\TopSpin3.6.0} 2004 44 — 300.20MHz

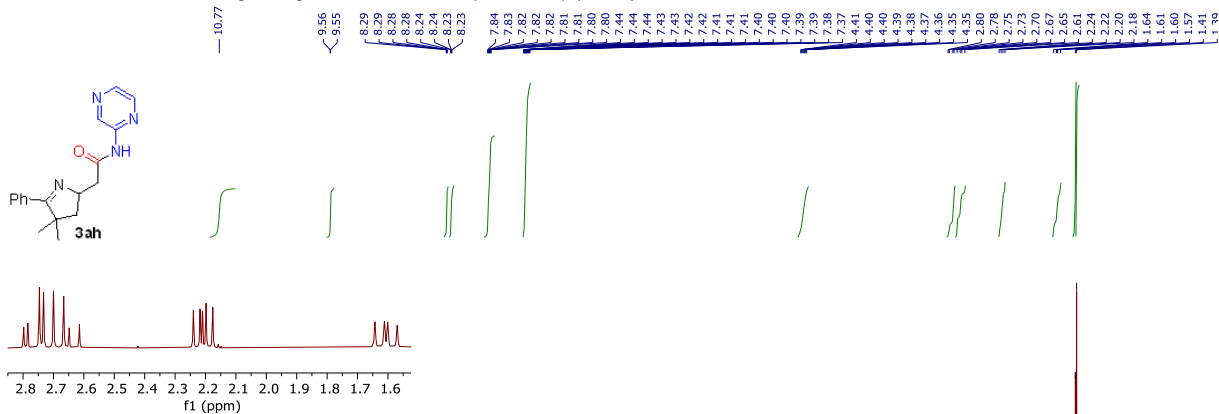

200421.f344.11.fid — Youcan Zhang YZhang-3-62 — C13CPD CDCl3 {C:\Bruker\TopSpin3.6.0} 2004 44 — 75.49MHz

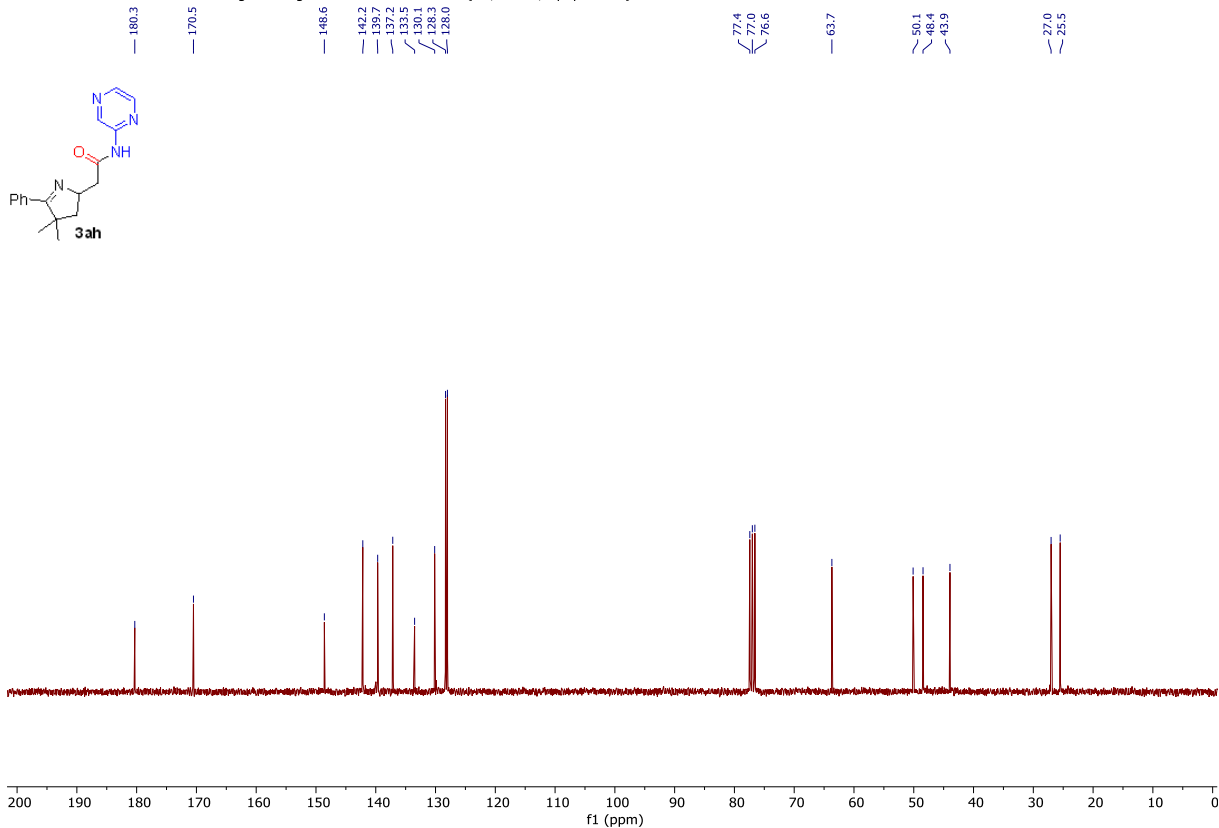

200415.f347.10.fid — Youcan Zhang YZhang-3-86 — PROTON CDCl3 {C:\Bruker\TopSpin3.6.0} 2004 47 — 300.20MHz

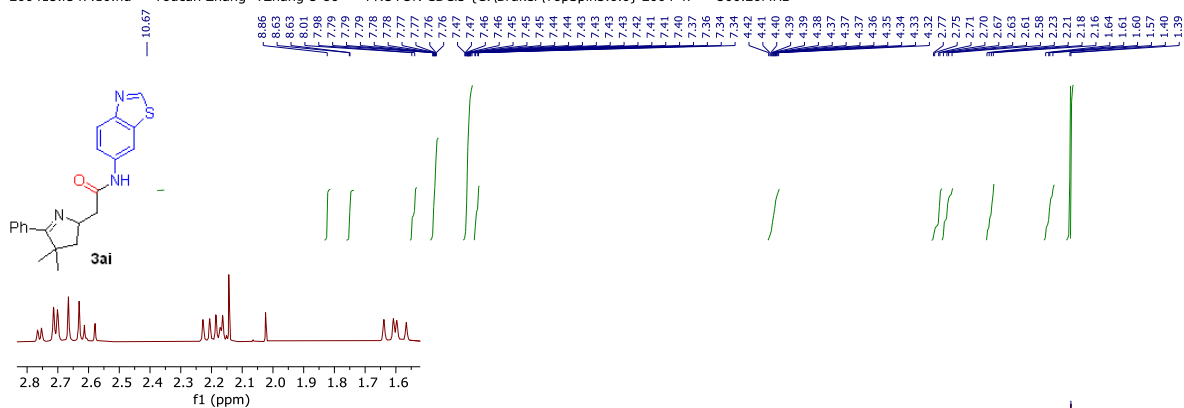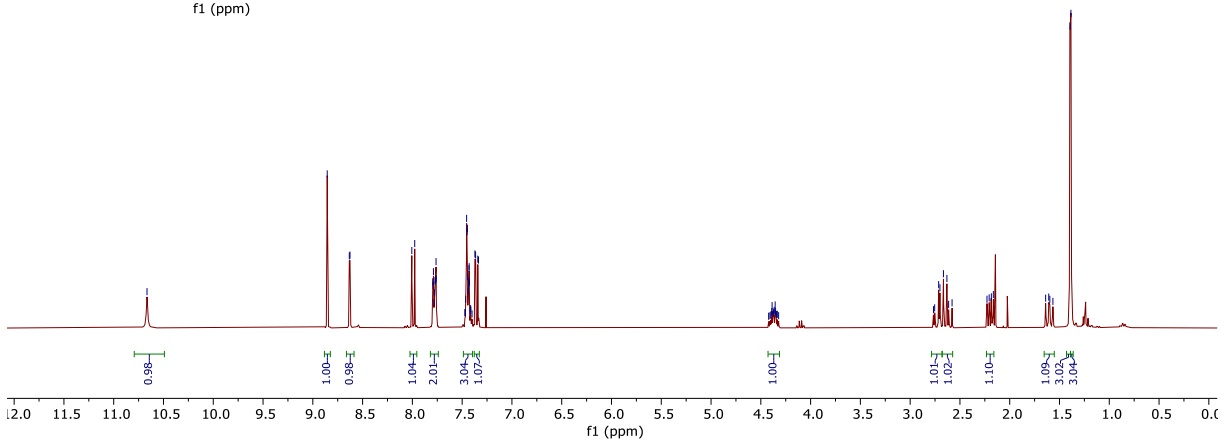

200415.f347.11.fid — Youcan Zhang YZhang-3-86 — C13CPD CDCl3 {C:\Bruker\TopSpin3.6.0} 2004 47 — 75.49MHz

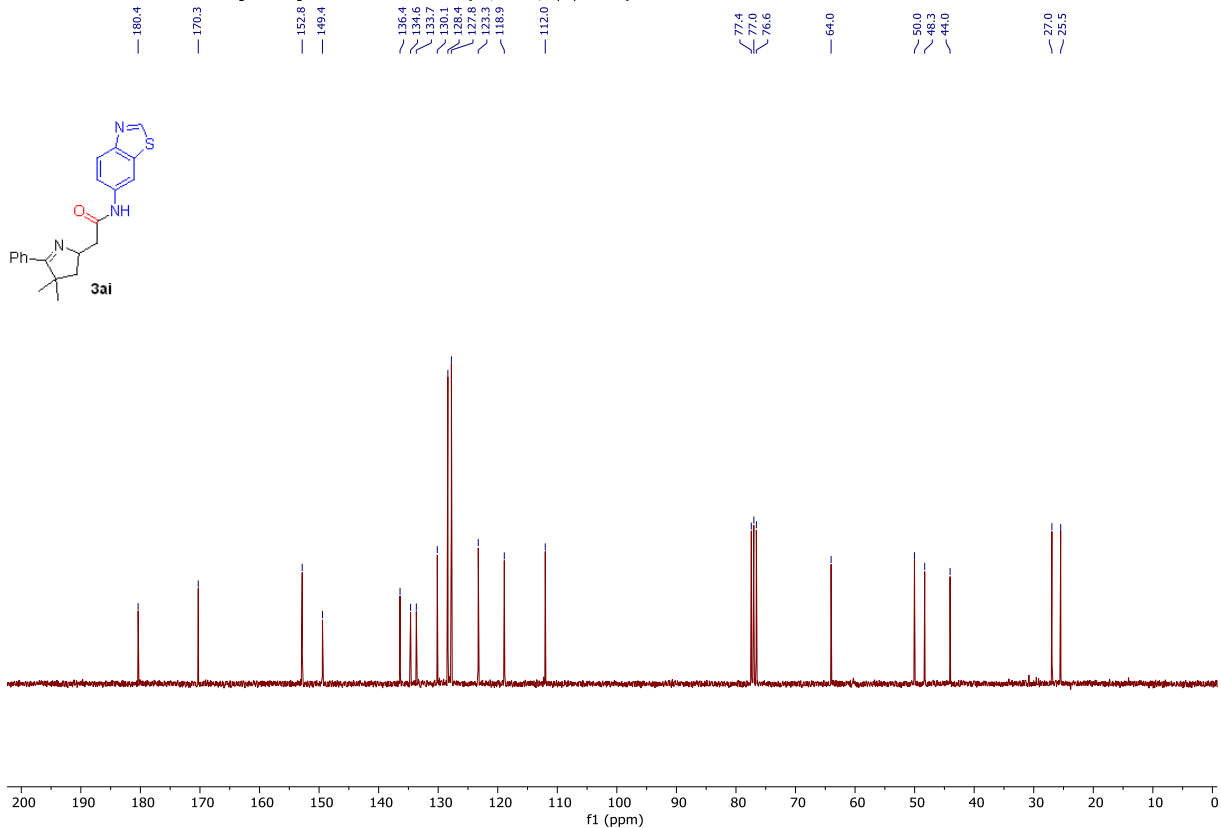

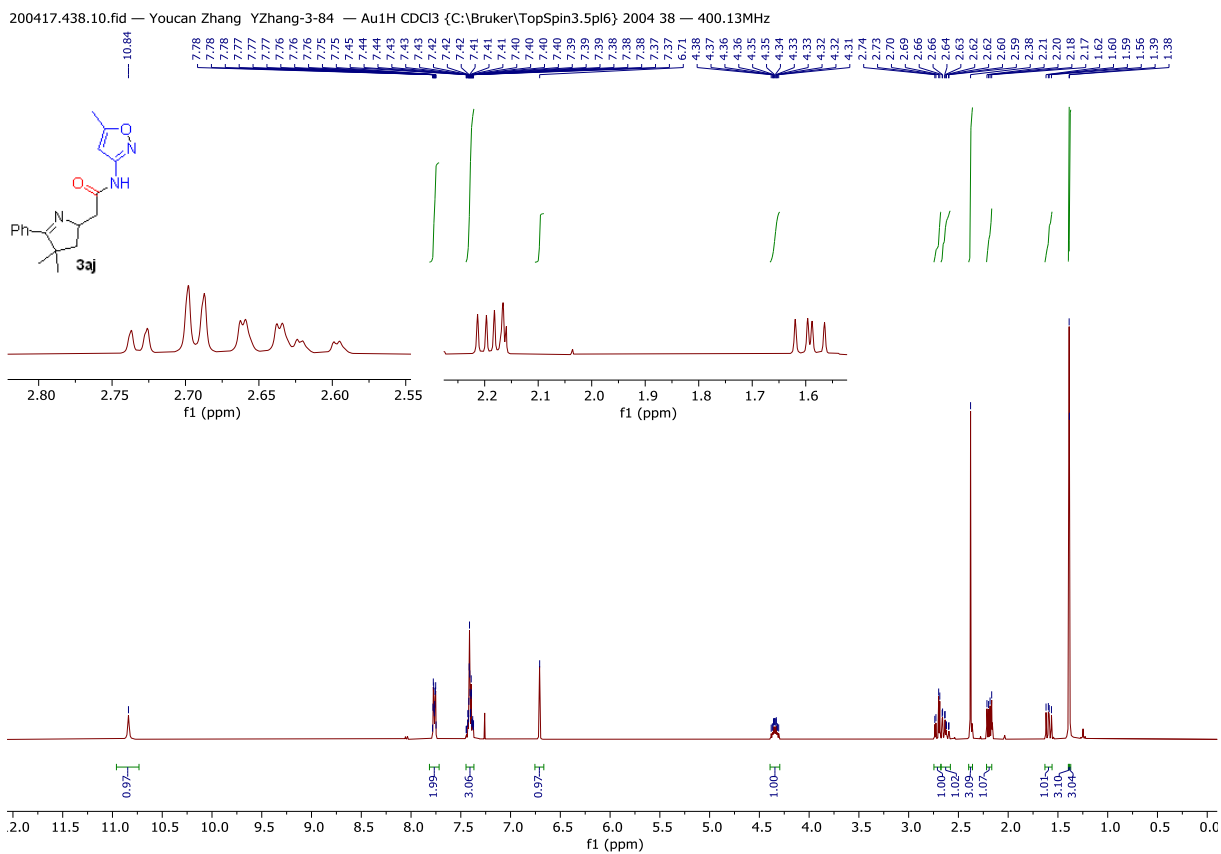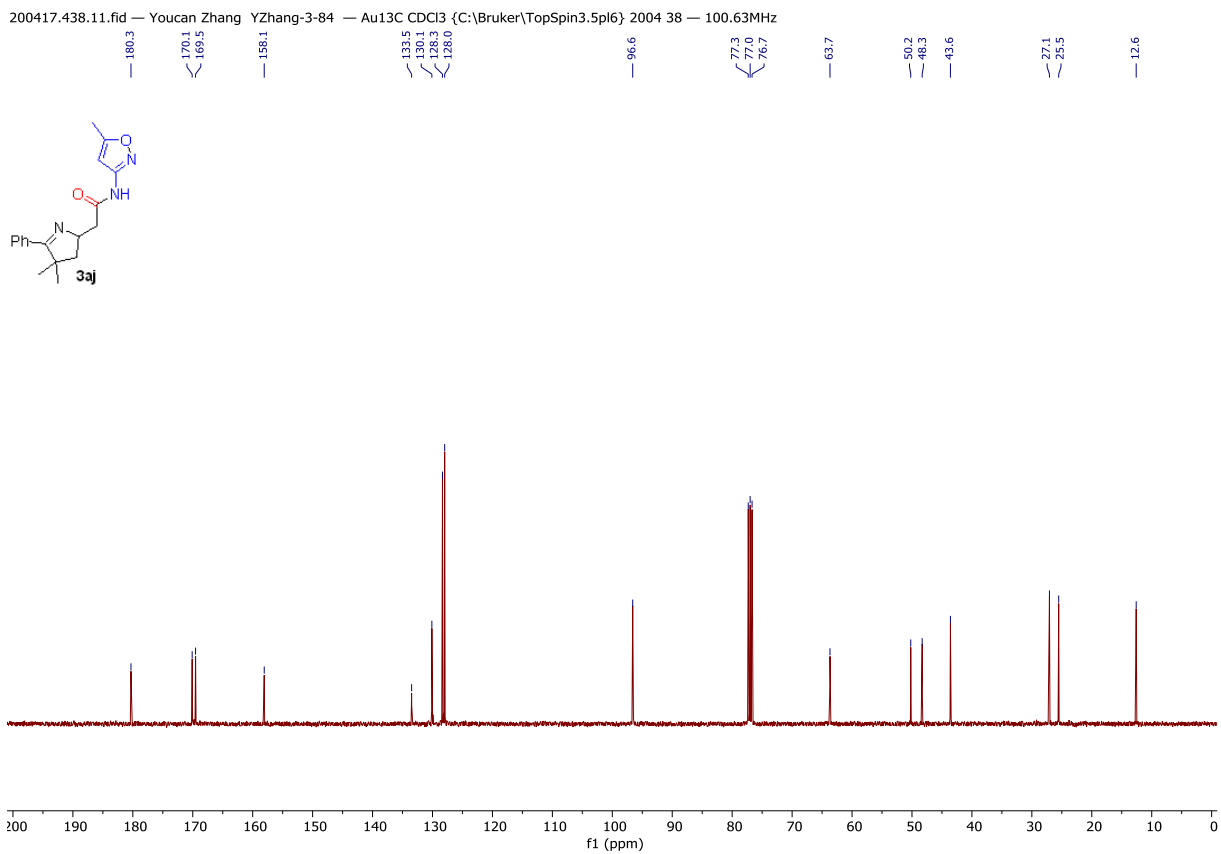

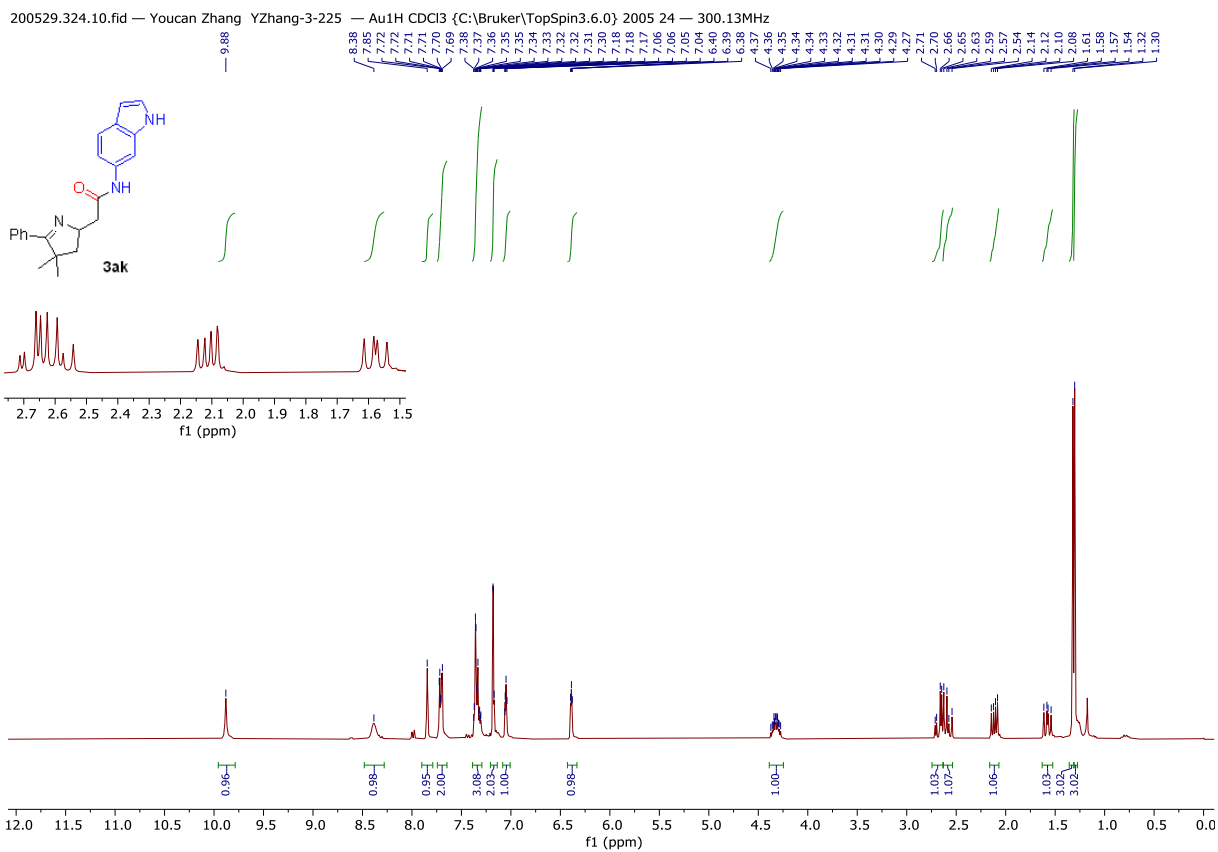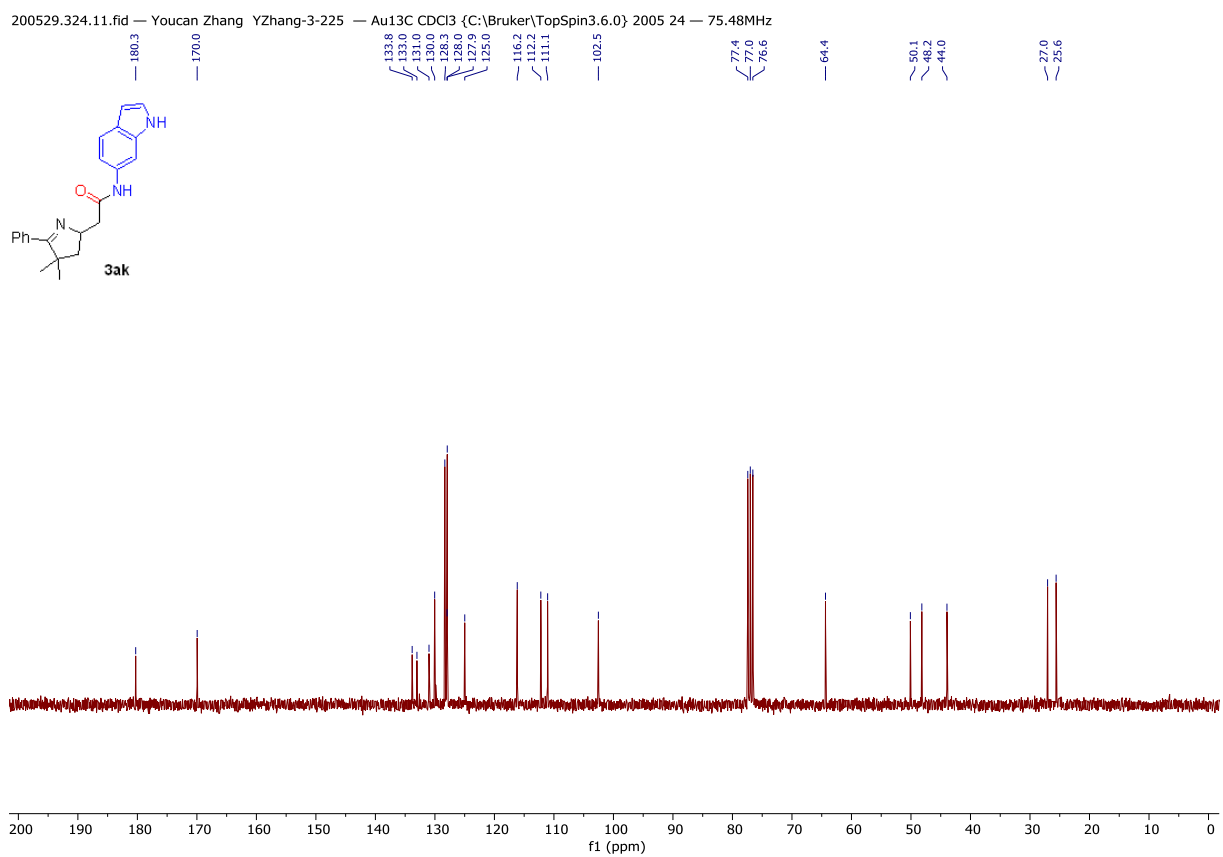



200526.316.10.fid — Youcan Zhang YZhang-3-208 — Au1H CDCl3 {C:\Bruker\TopSpin3.6.0} 2005 16 — 300.13MHz

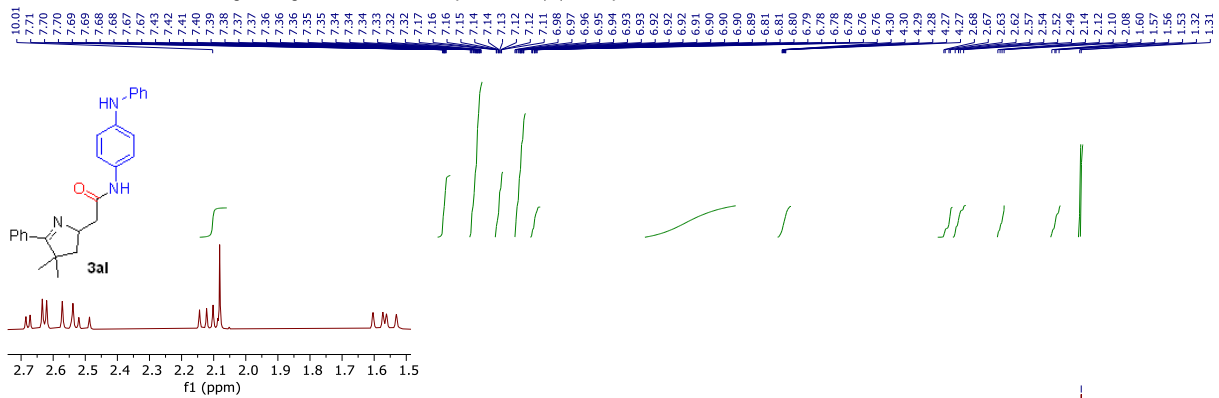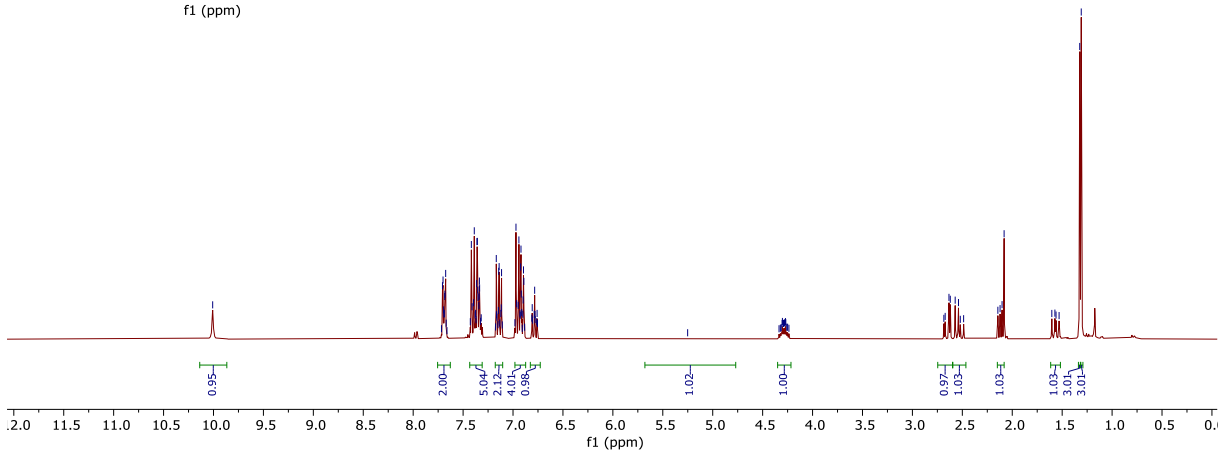

200526.316.11.fid — Youcan Zhang YZhang-3-208 — Au13C CDCl3 {C:\Bruker\TopSpin3.6.0} 2005 16 — 75.48MHz

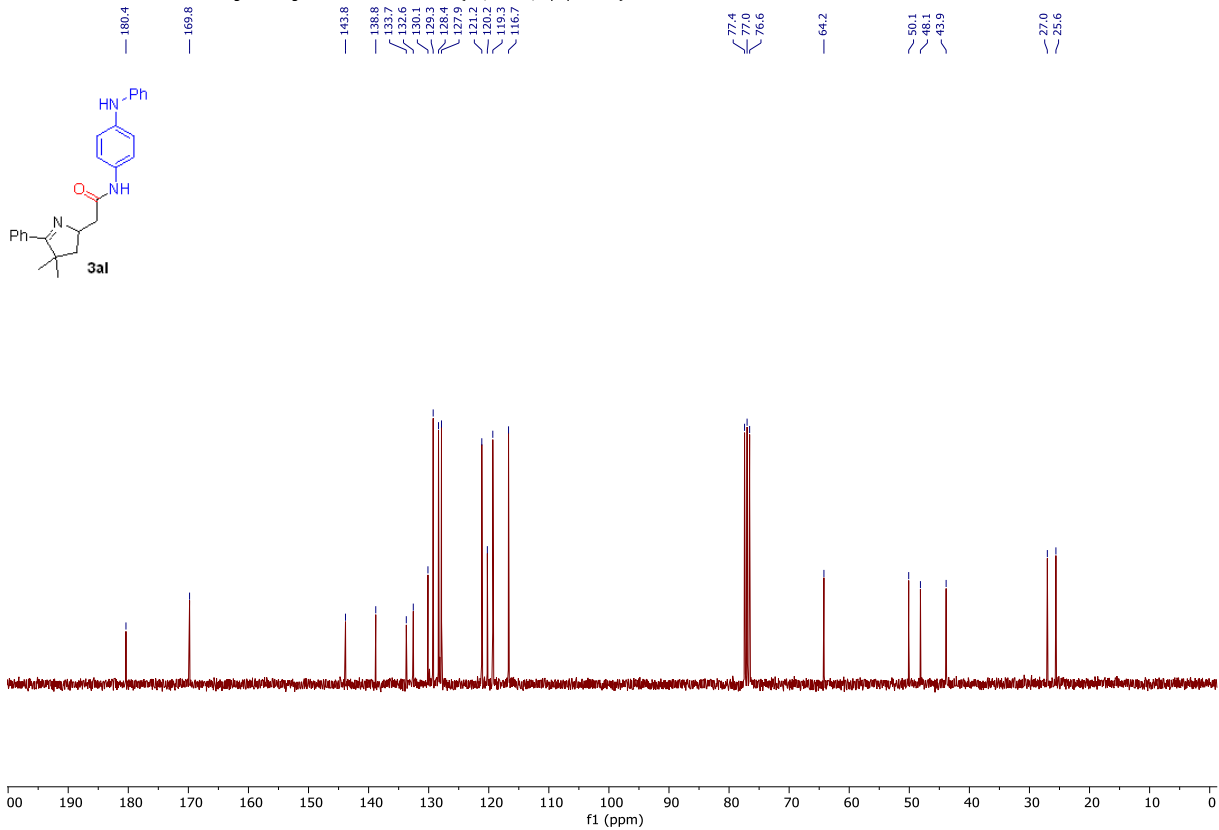

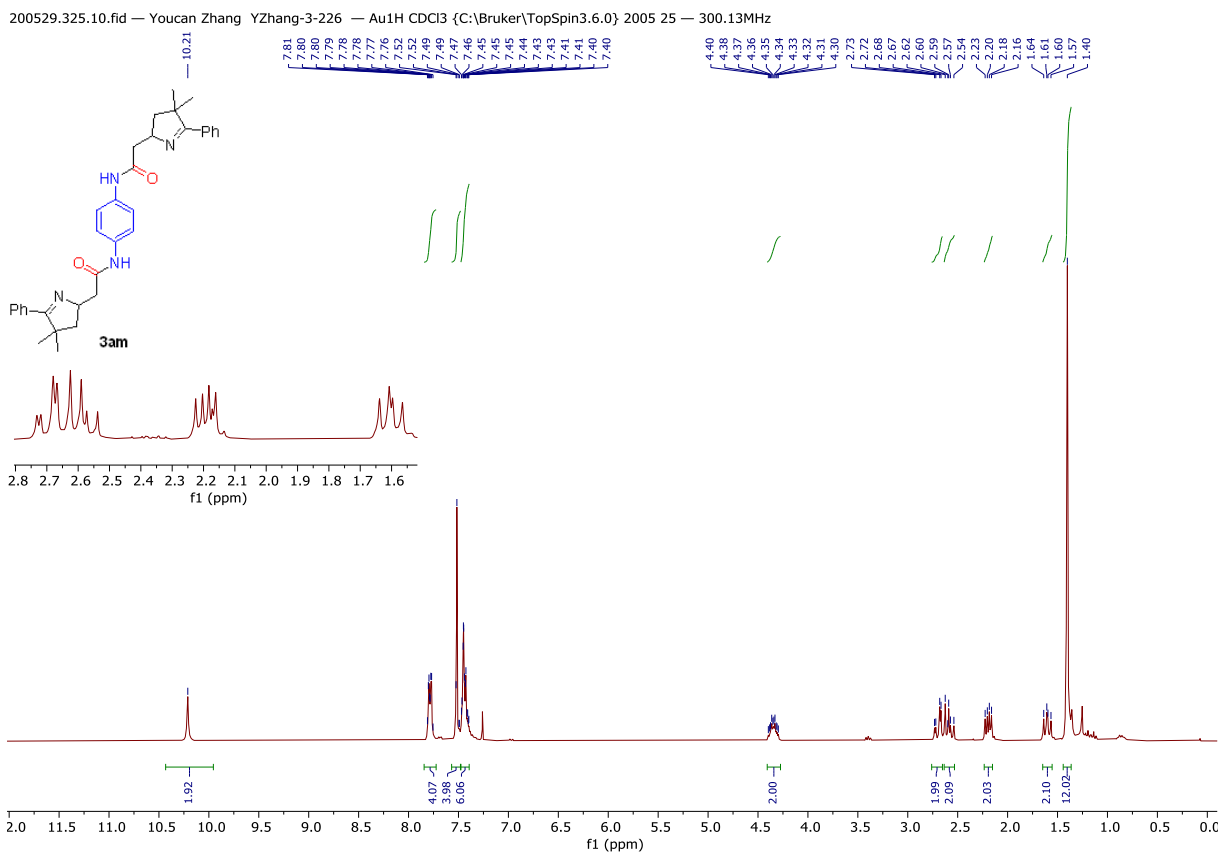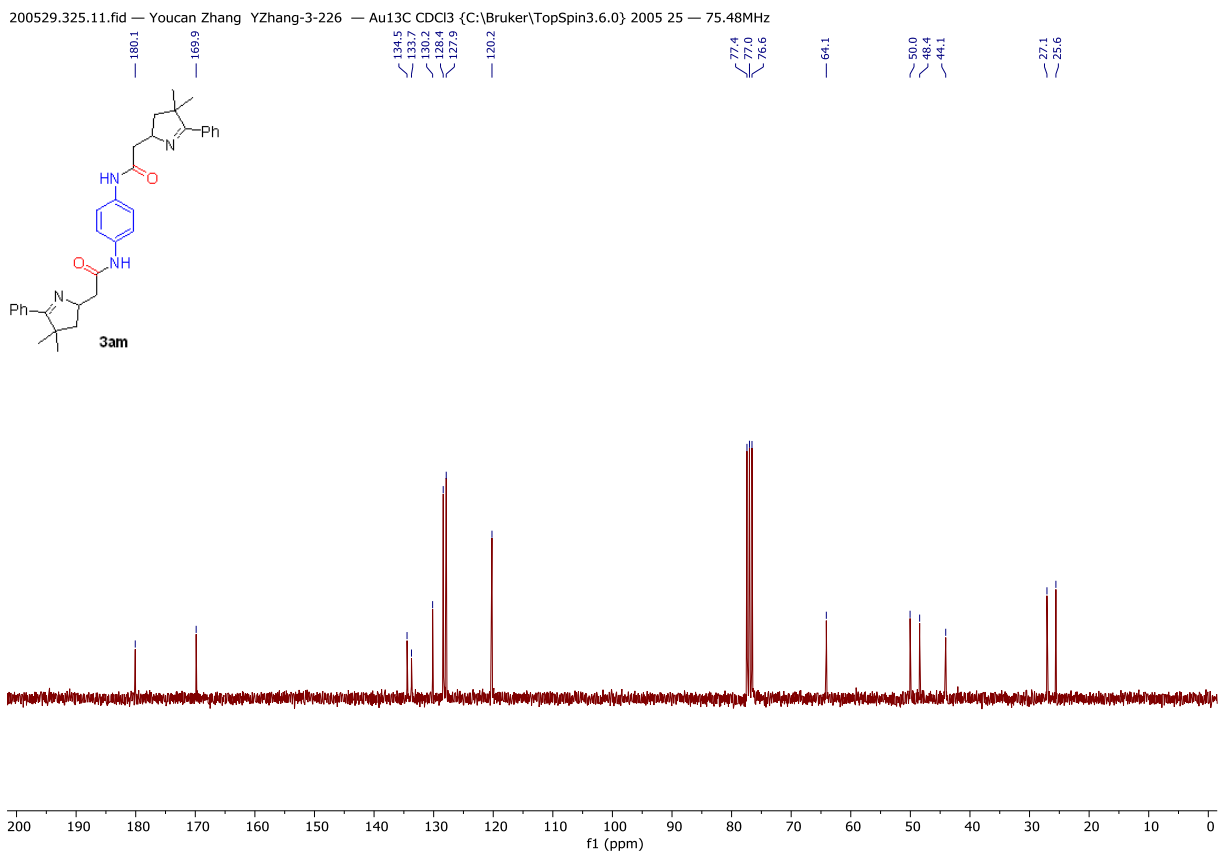

200522.f318.10.fid — Youcan Zhang, 3-201 — PROTON CDCl3 {C:\Bruker\TopSpin3.6.0} 2005 18 — 300.20MHz

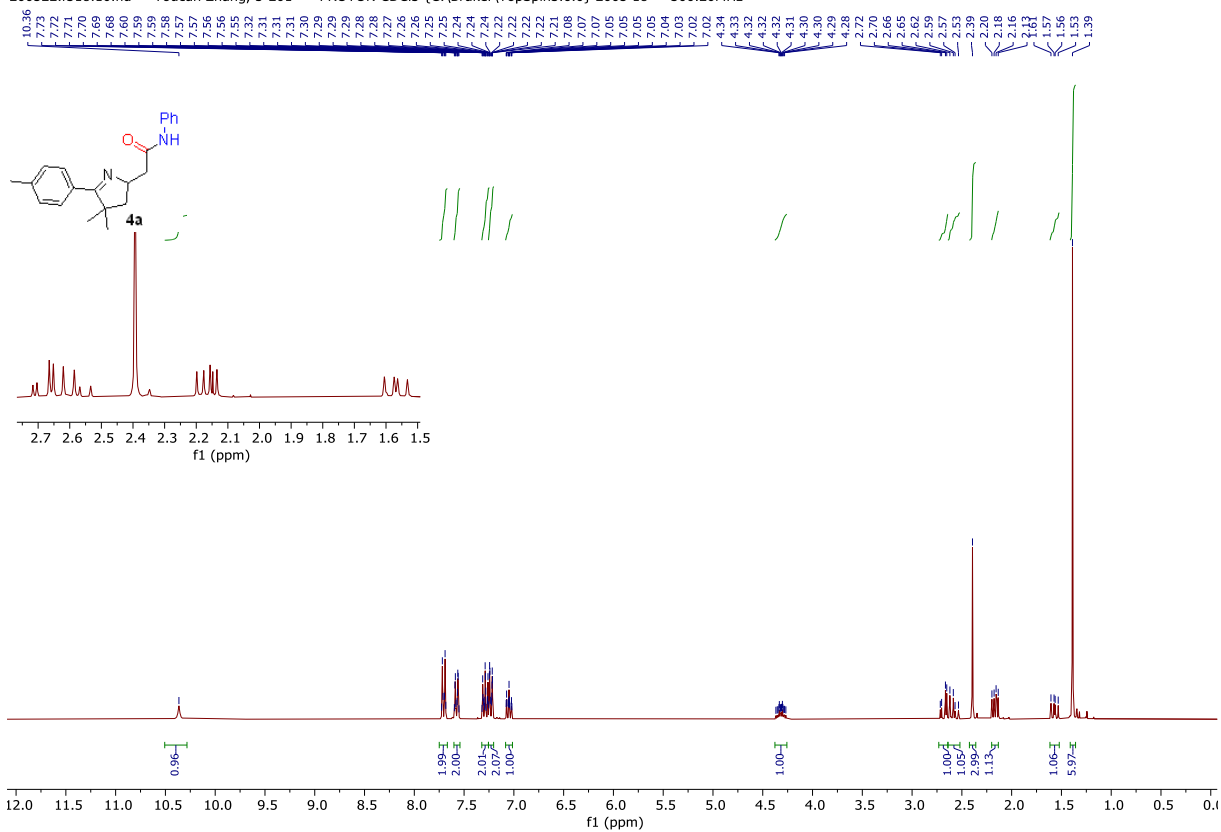

200522.f318.11.fid — Youcan Zhang, 3-201 — C13CPD CDCl3 {C:\Bruker\TopSpin3.6.0} 2005 18 — 75.49MHz

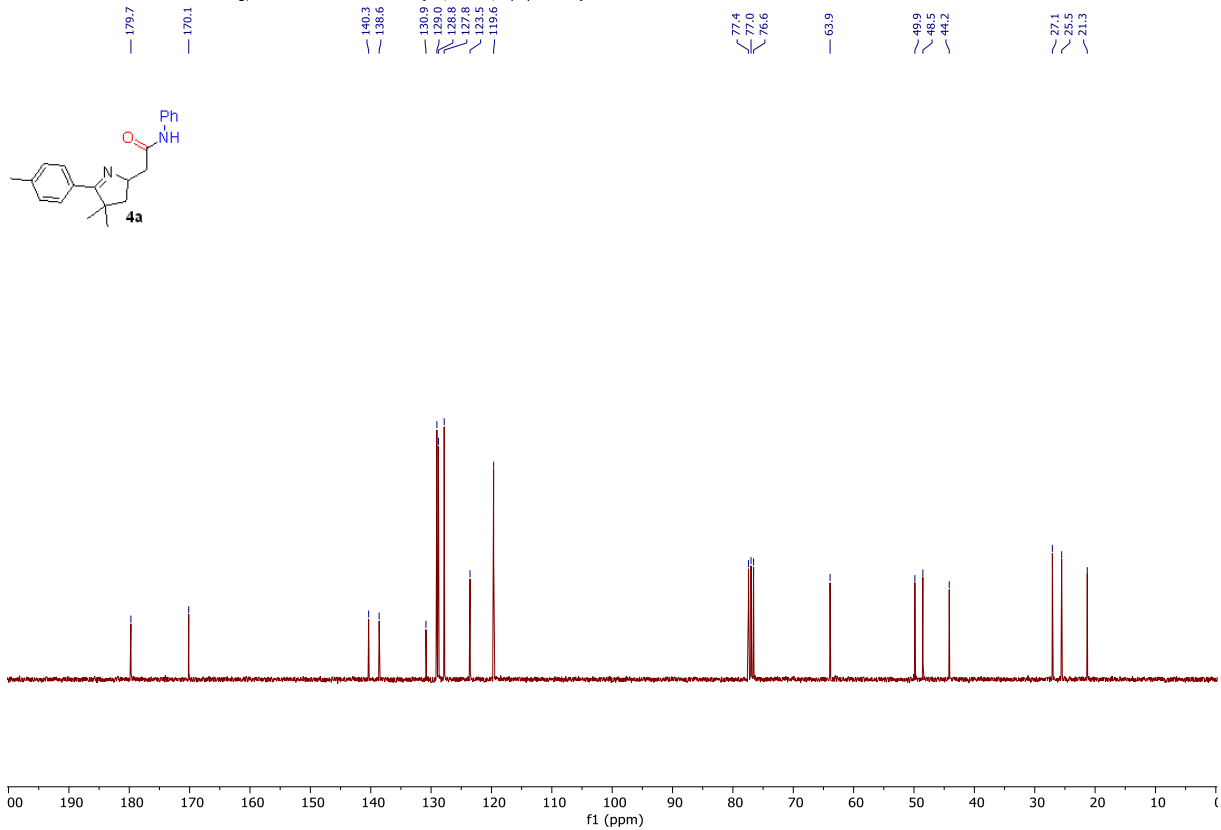

200522.f319.10.fid — Youcan Zhang, 3-202 — PROTON CDCl3 {C:\Bruker\TopSpin3.6.0} 2005 19 — 300.20MHz

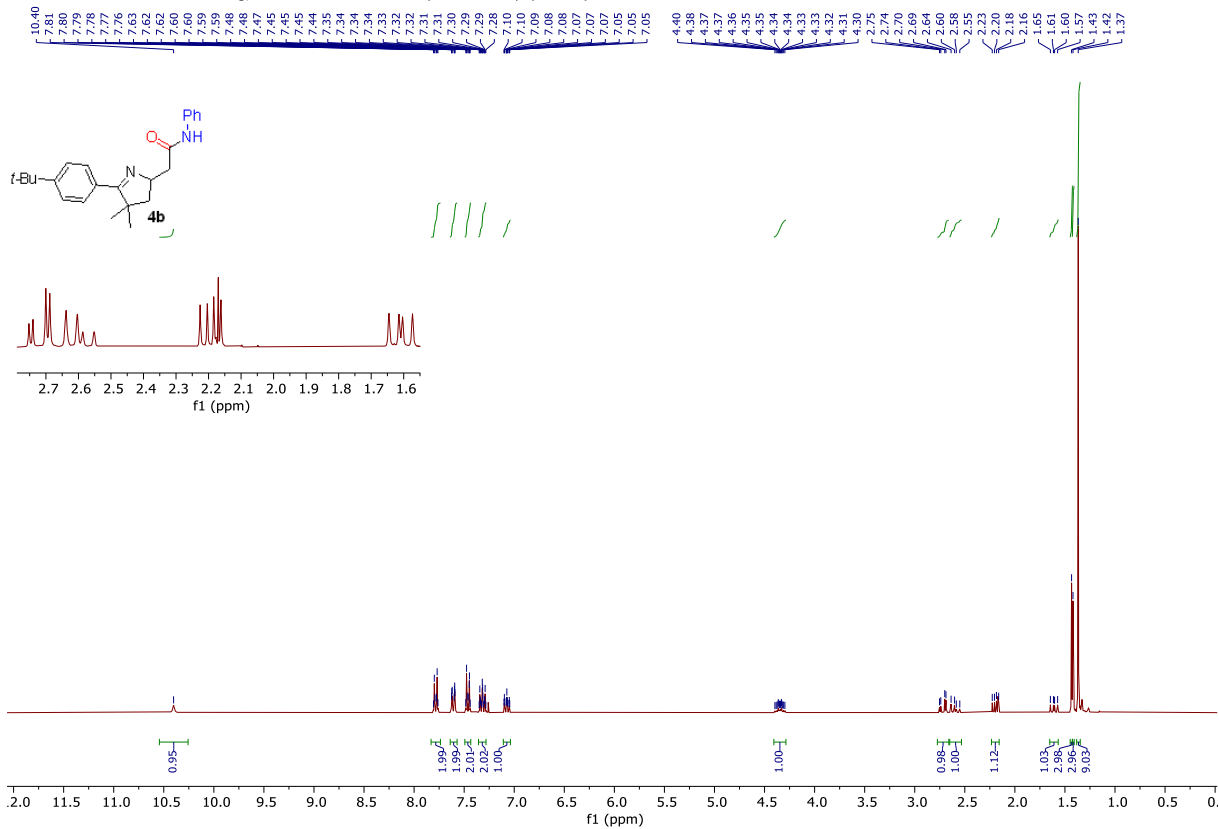

200522.f319.11.fid — Youcan Zhang, 3-202 — C13CPD CDCl3 {C:\Bruker\TopSpin3.6.0} 2005 19 — 75.49MHz

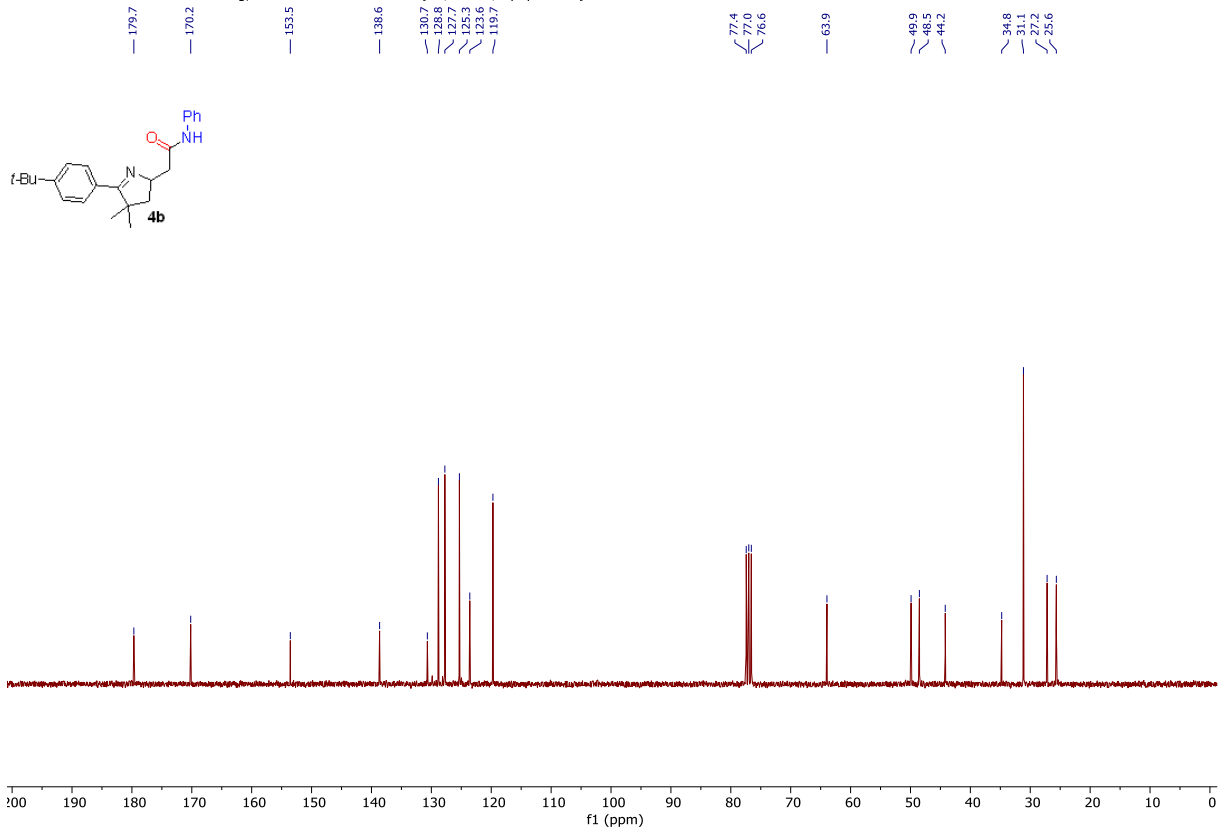

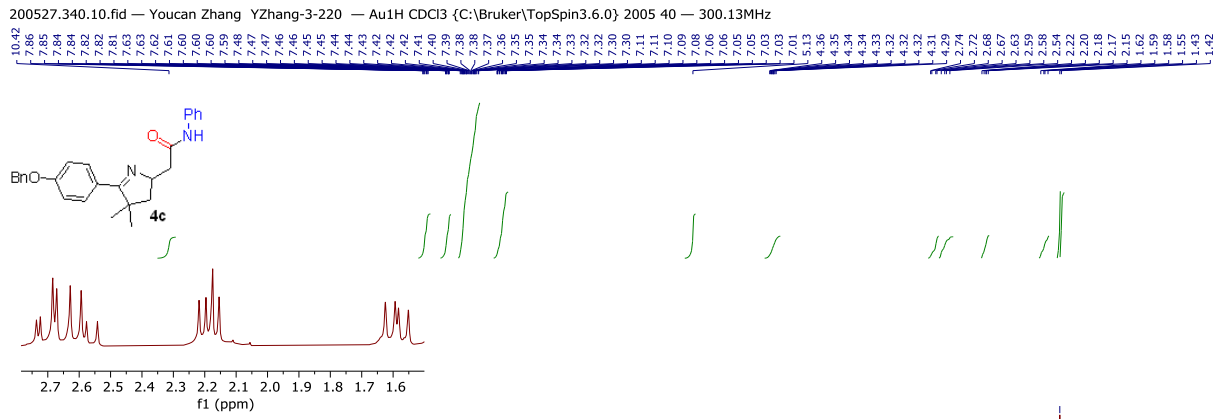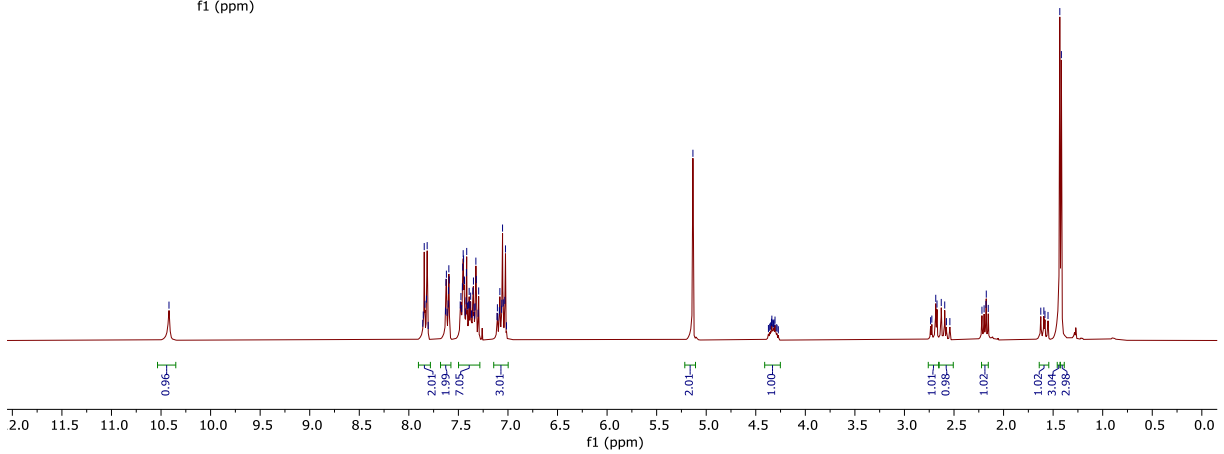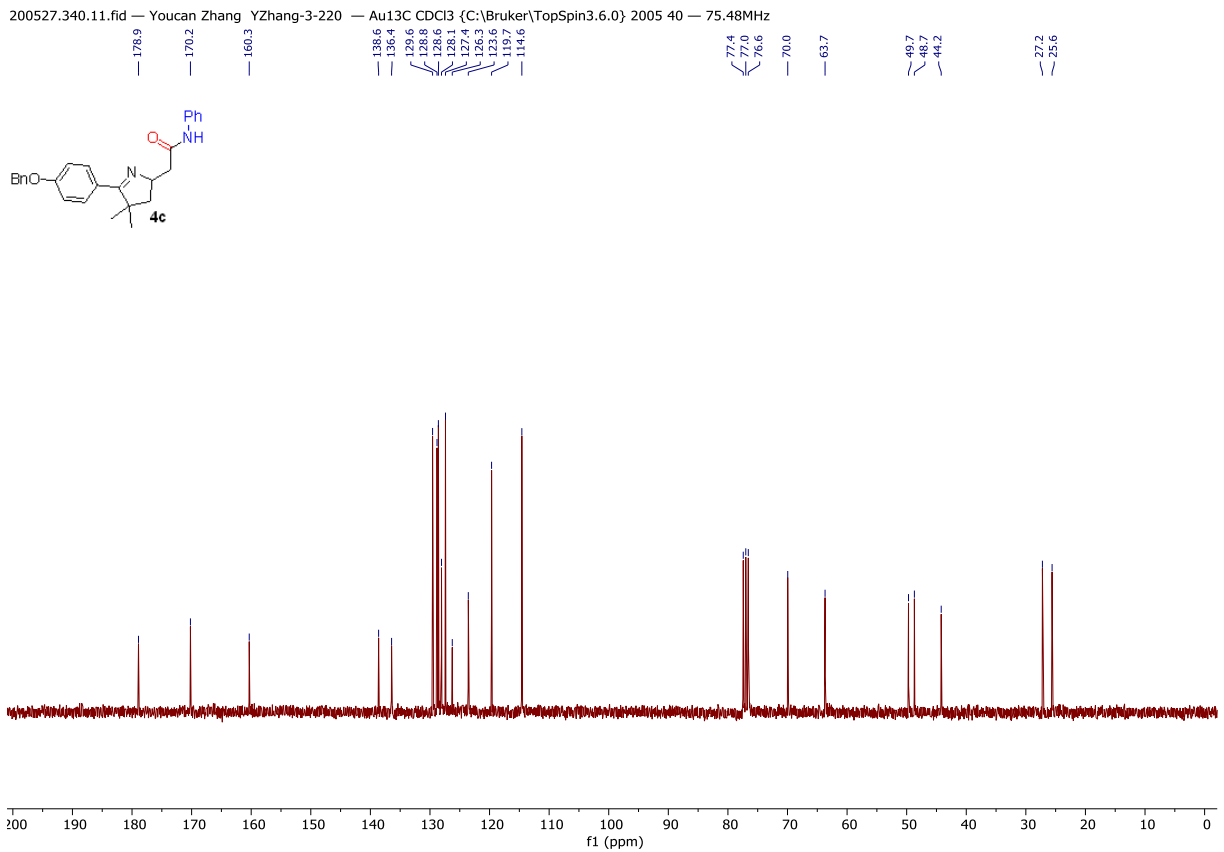

200618.326.10.fid — Youcan Zhang YZhang-3-242 — Au1H CDCl3 {C:\Bruker\TopSpin3.6.0} 2006 26 — 300.13MHz

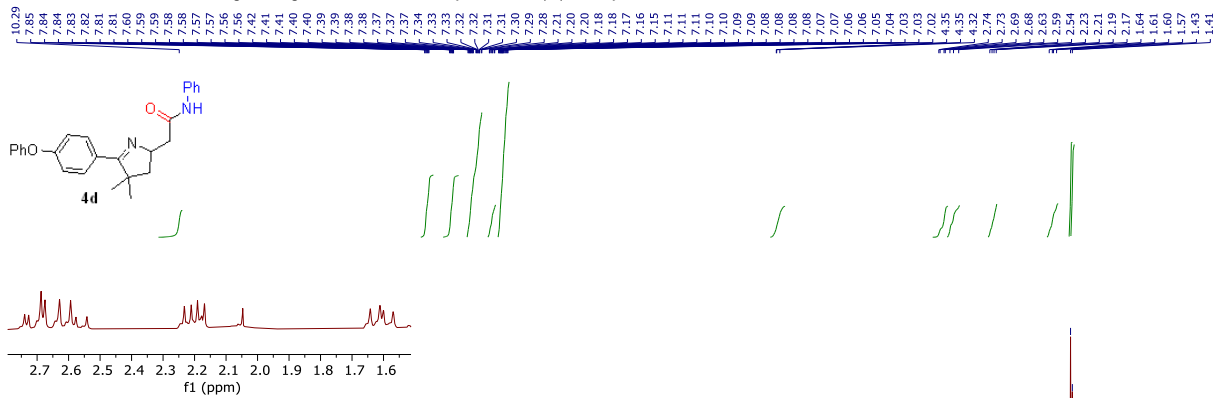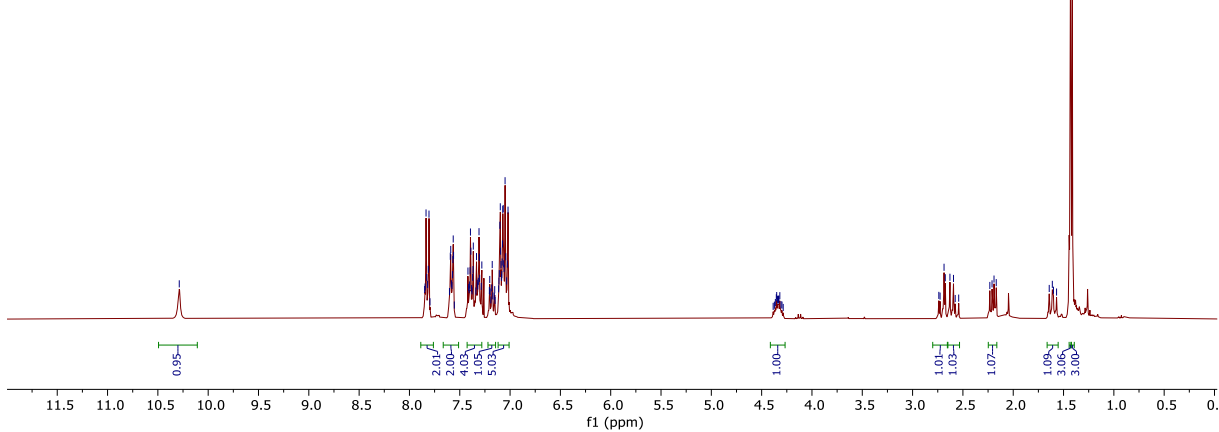

200618.326.11.fid — Youcan Zhang YZhang-3-242 — Au13C CDCl3 {C:\Bruker\TopSpin3.6.0} 2006 26 — 75.48MHz

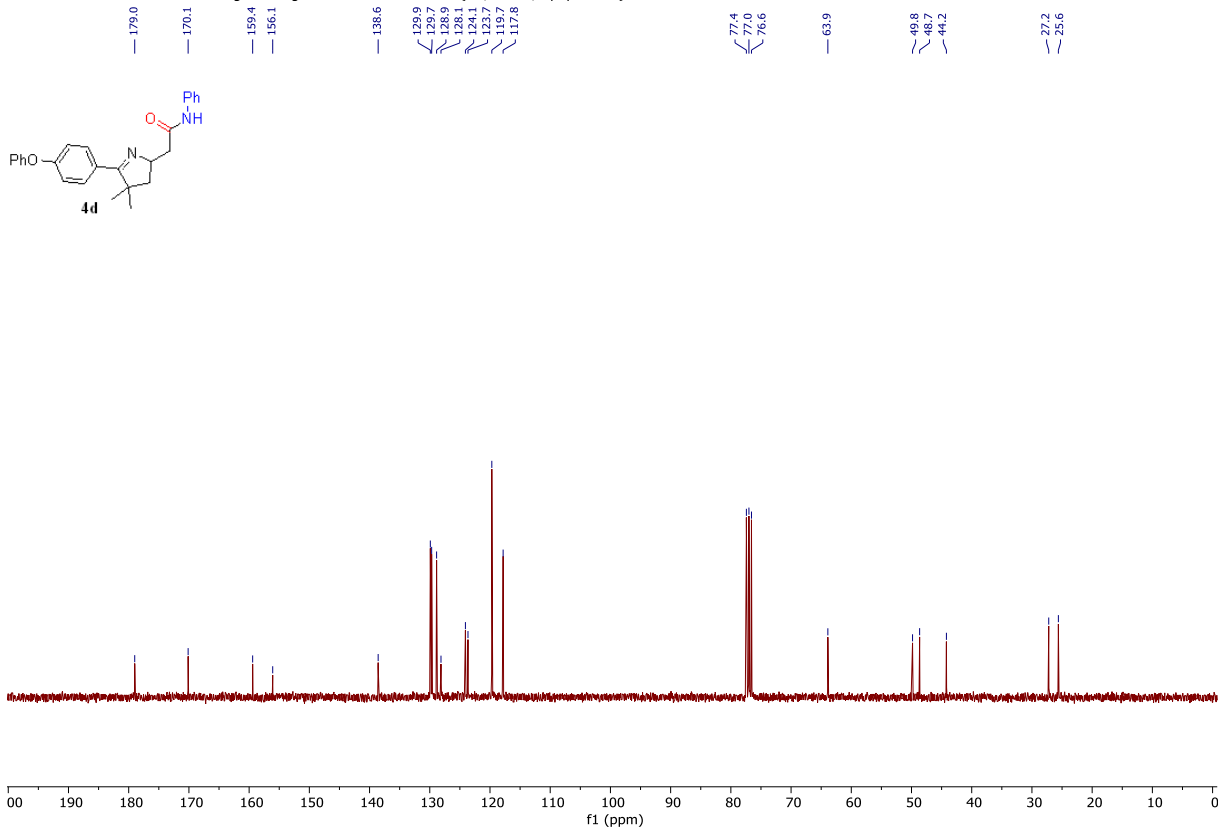

200619.f327.10.fid — Youcan Zhang YZhang-3-240 — PROTON CDCl3 {C:\Bruker\TopSpin3.6.0} 2006 27 — 300.20MHz

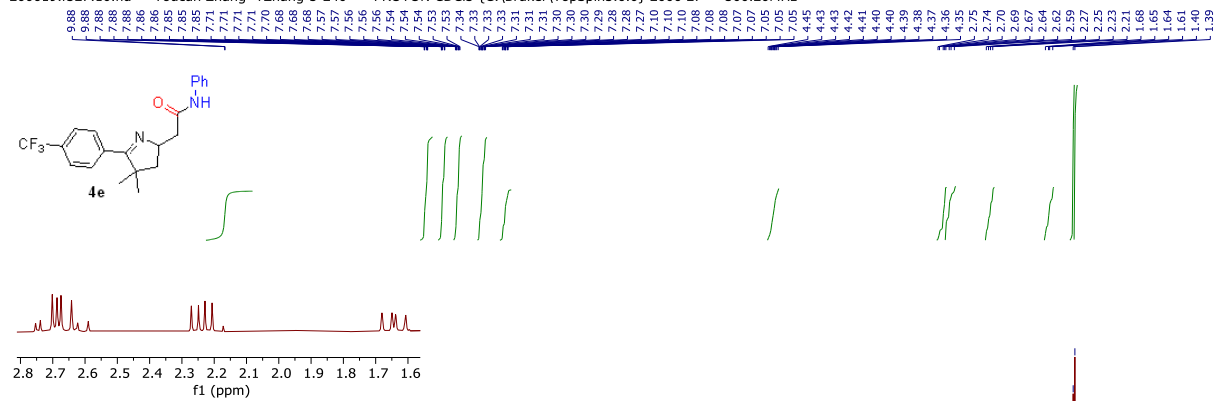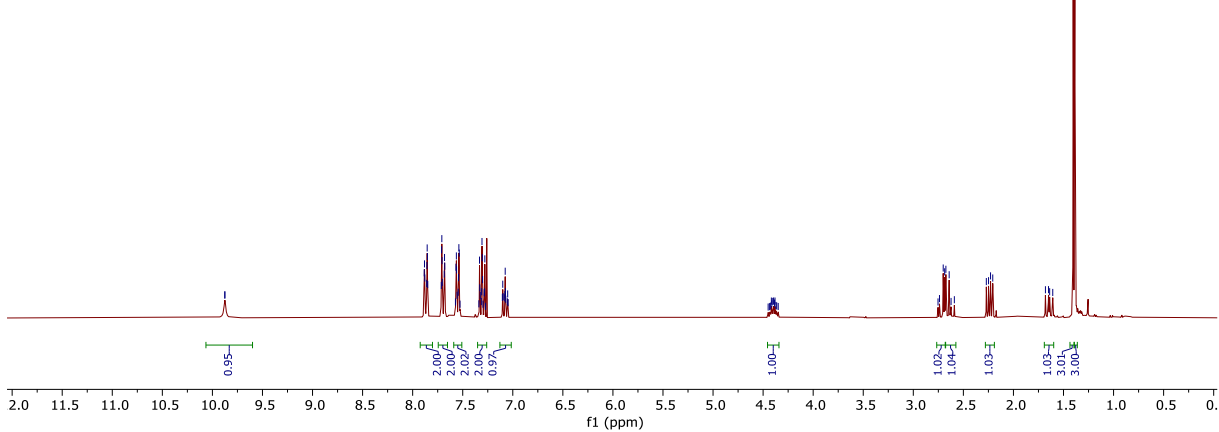

200619.f327.11.fid — Youcan Zhang YZhang-3-240 — C13CPD CDCl3 {C:\Bruker\TopSpin3.6.0} 2006 27 — 75.49MHz

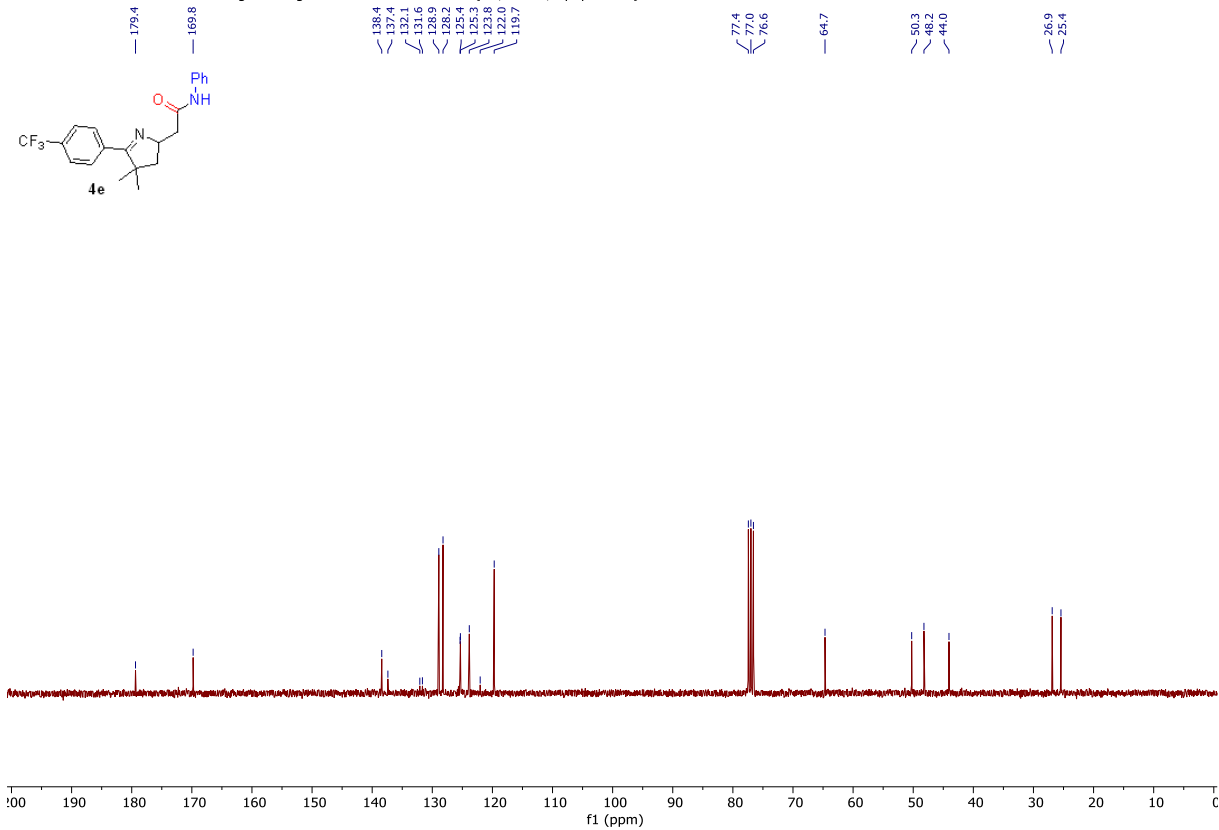

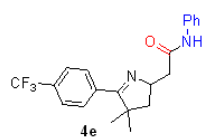

-62.9

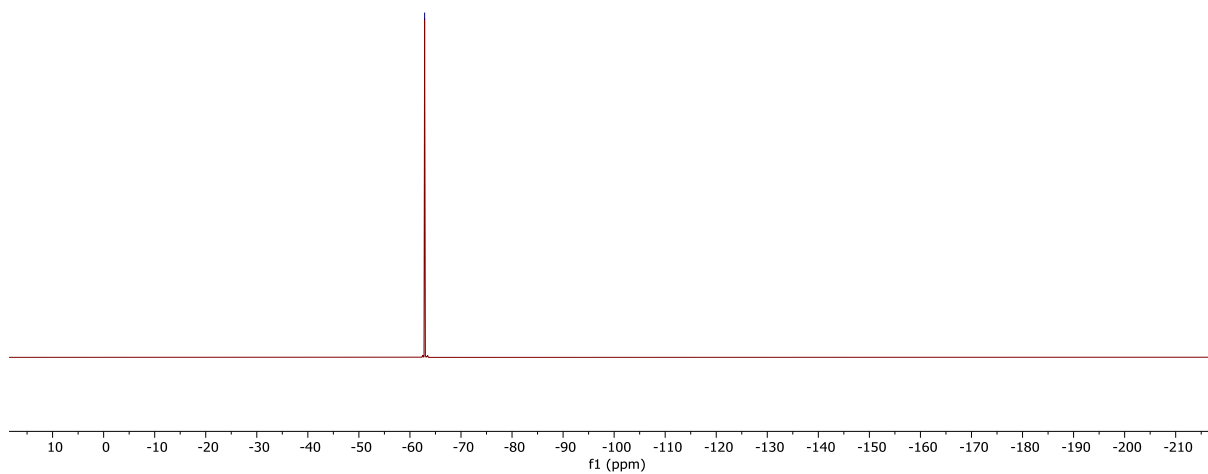



200612.f333.10.fid — Zhang/ Y Zhang-3-233 — PROTON CDCl3 {C:\Bruker\TopSpin3.6.0} 2006 33 — 300.20MHz

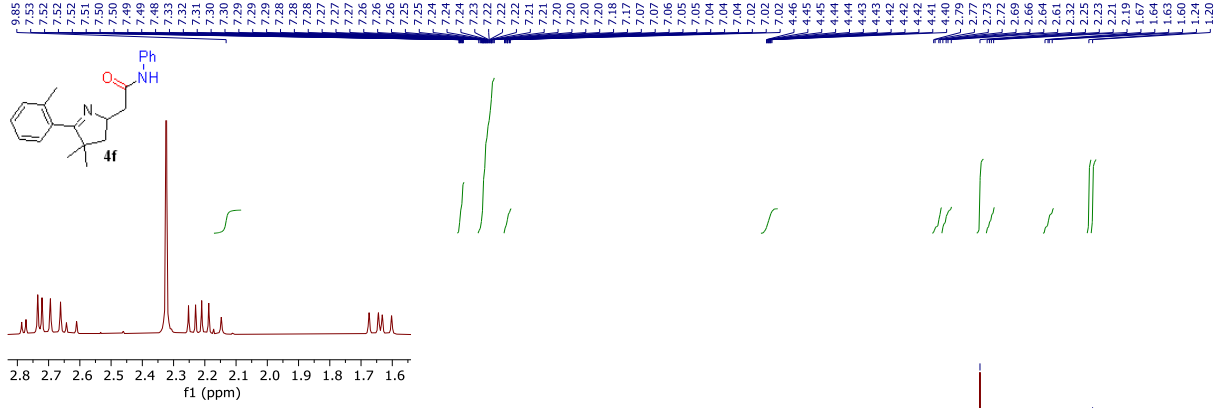

200612.f333.11.fid — Zhang/ Y Zhang-3-233 — C13CPD CDCl3 {C:\Bruker\TopSpin3.6.0} 2006 33 — 75.49MHz

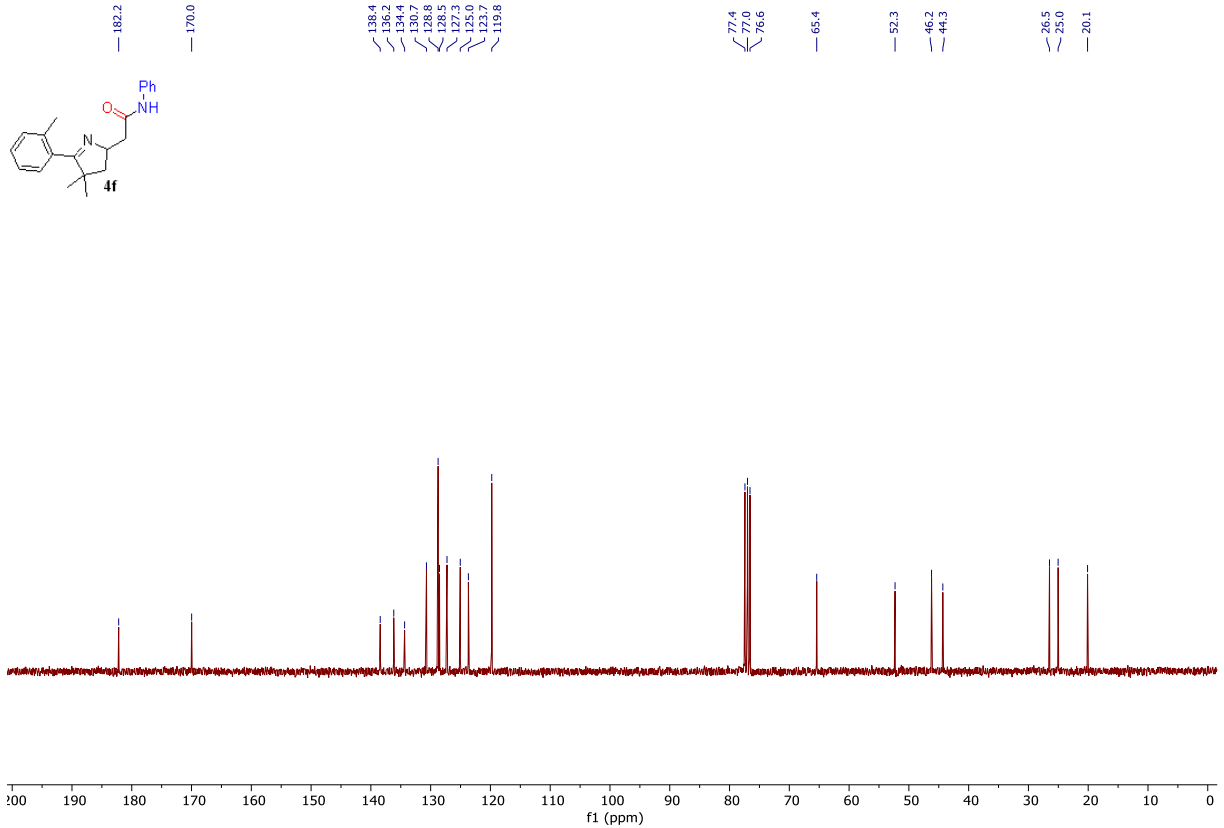

200623.f308.10.fid — Zhang/ Y Zhang-3-25-1 — PROTON CDCl3 {C:\Bruker\TopSpin3.6.0} 2006 8 — 300.20MHz

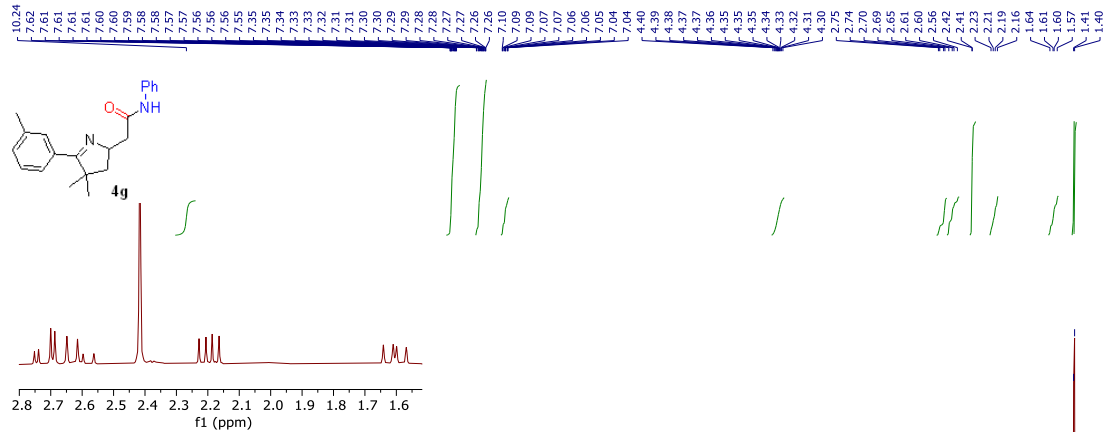

200623.f308.11.fid — Zhang/ Y Zhang-3-25-1 — C13CPD CDCl3 {C:\Bruker\TopSpin3.6.0} 2006 8 — 75.49MHz

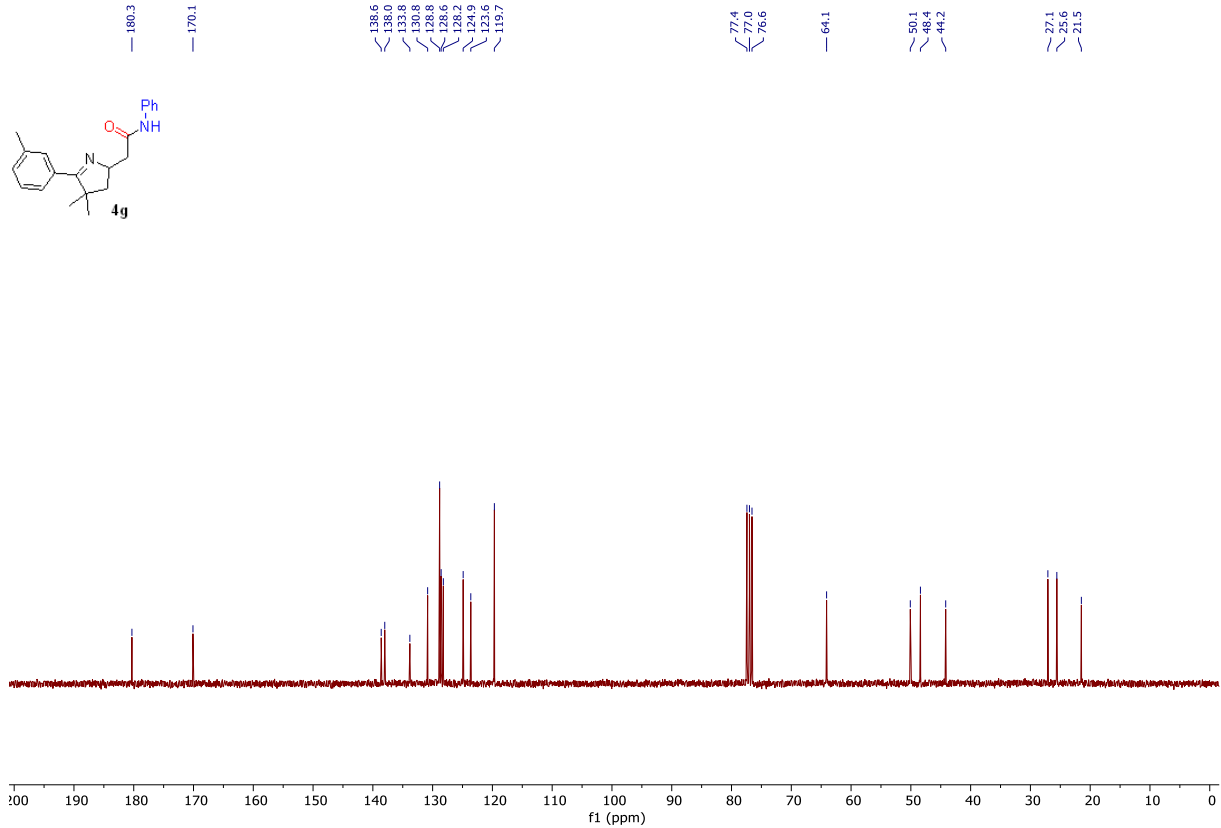

200622.f342.10.fid — Youcan Zhang YZhang-3-245 — PROTON CDCl3 {C:\Bruker\TopSpin3.6.0} 2006 42 — 300.20MHz

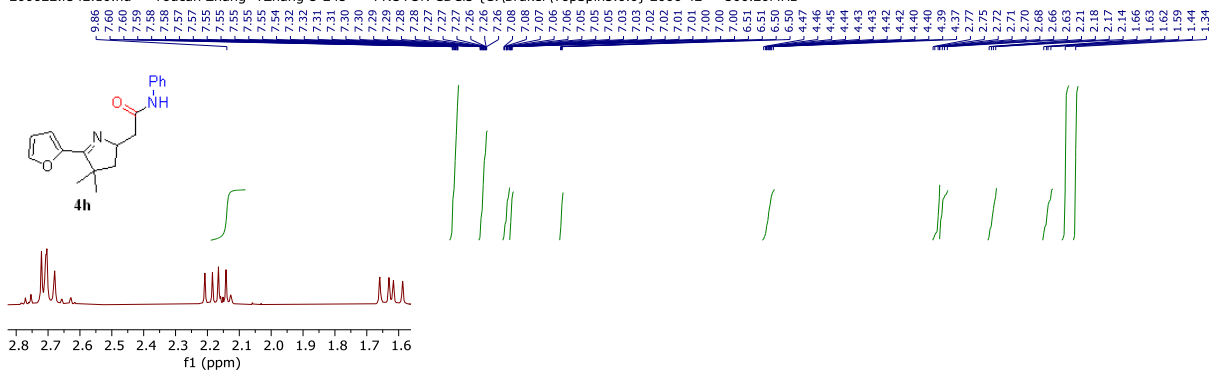

200622.f342.11.fid — Youcan Zhang YZhang-3-245 — C13CPD CDCl3 {C:\Bruker\TopSpin3.6.0} 2006 42 — 75.49MHz

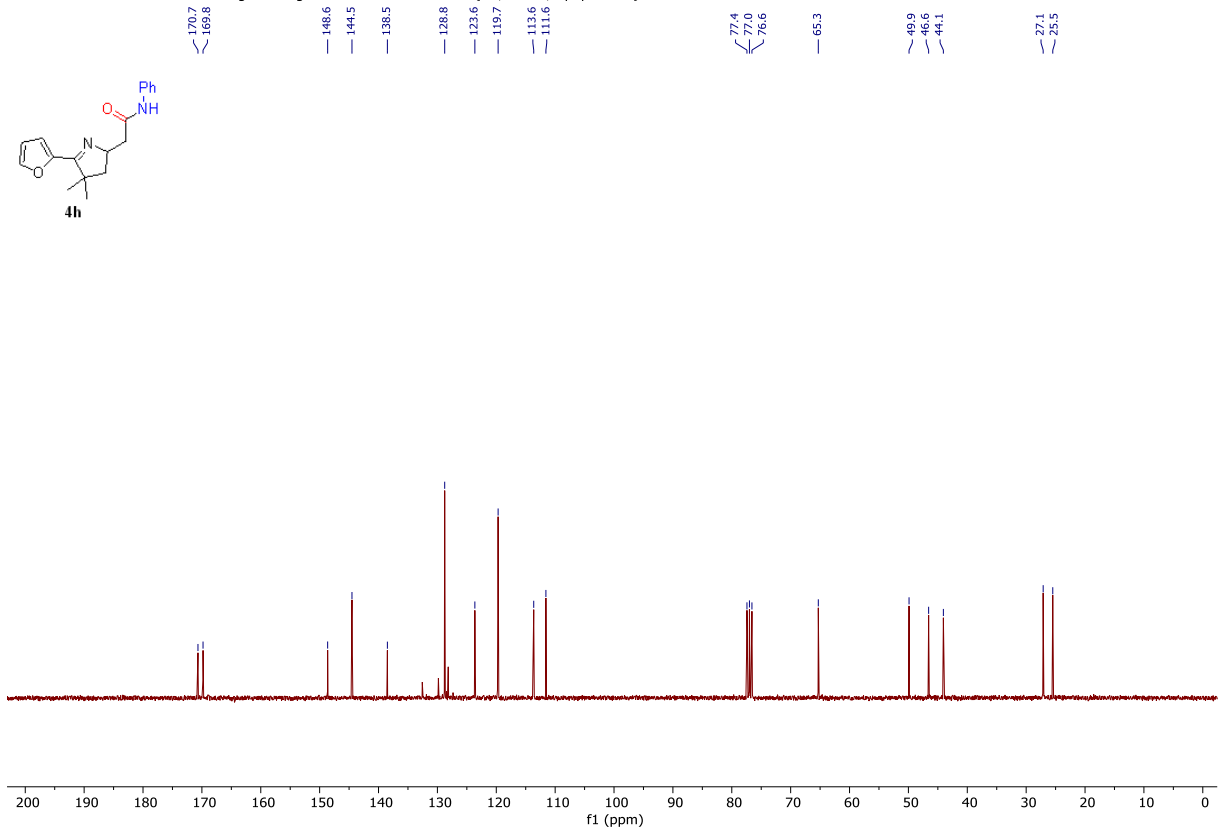

200612.f332.10.fid — Zhang/ Y Zhang-3-230 — PROTON CDCl3 {C:\Bruker\TopSpin3.6.0} 2006 32 — 300.20MHz

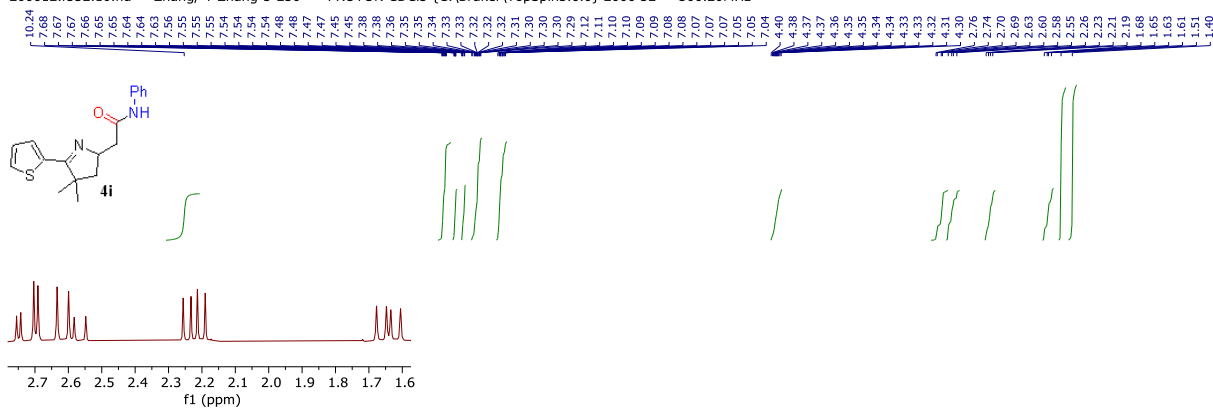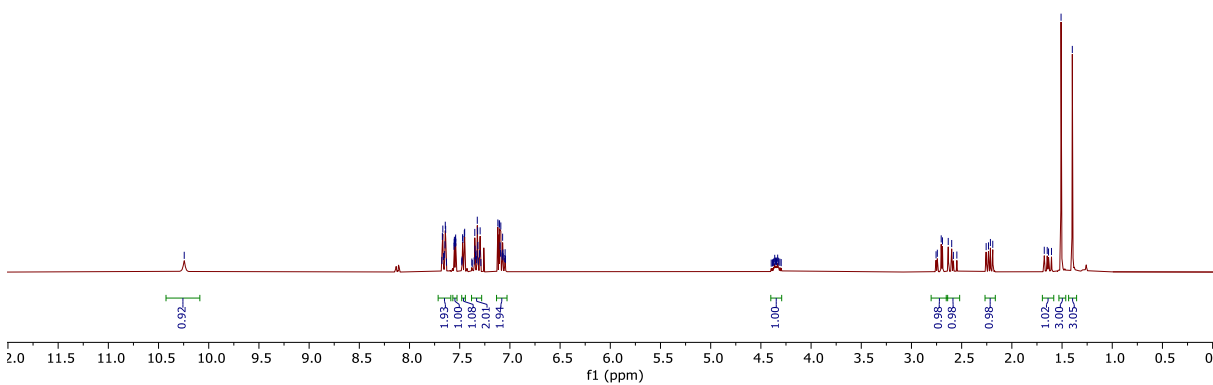

200612.f332.11.fid — Zhang/ Y Zhang-3-230 — C13CPD CDCl3 {C:\Bruker\TopSpin3.6.0} 2006 32 — 75.49MHz

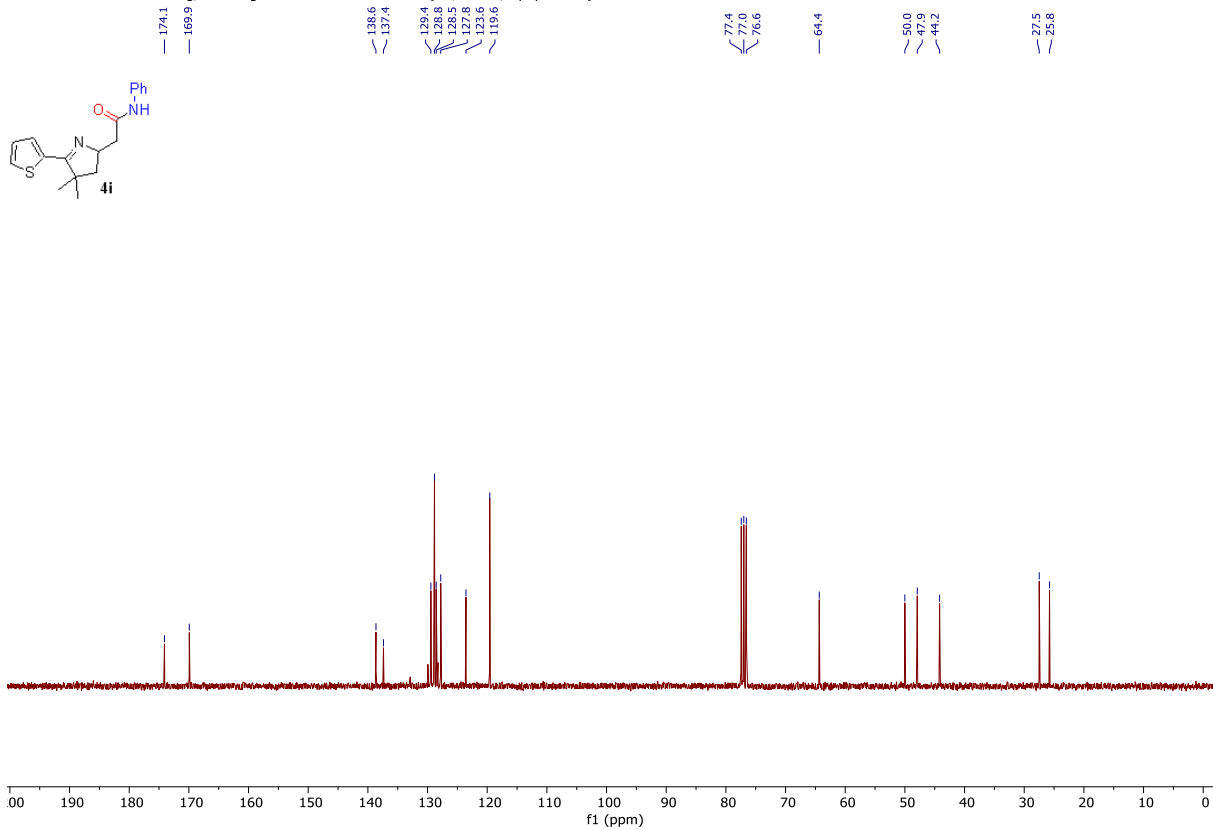

200612.f331.10.fid — Zhang/ Y Zhang-3-232 — PROTON CDCl3 {C:\Bruker\TopSpin3.6.0} 2006 31 — 300.20MHz

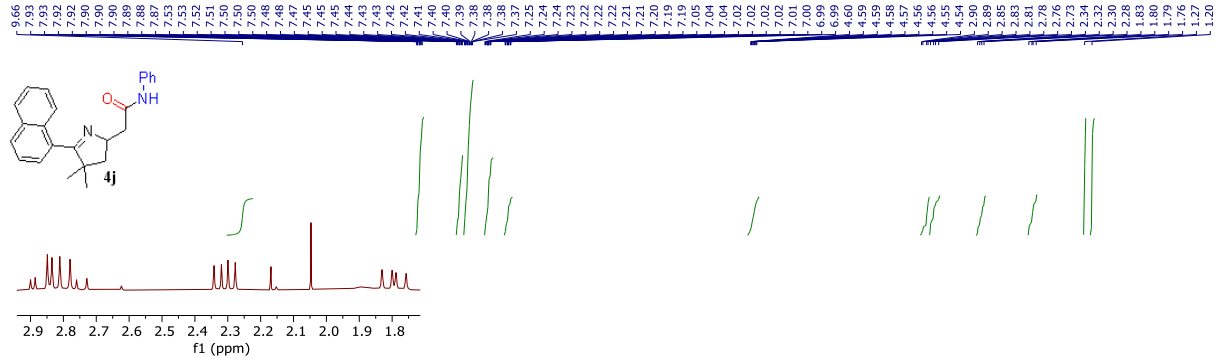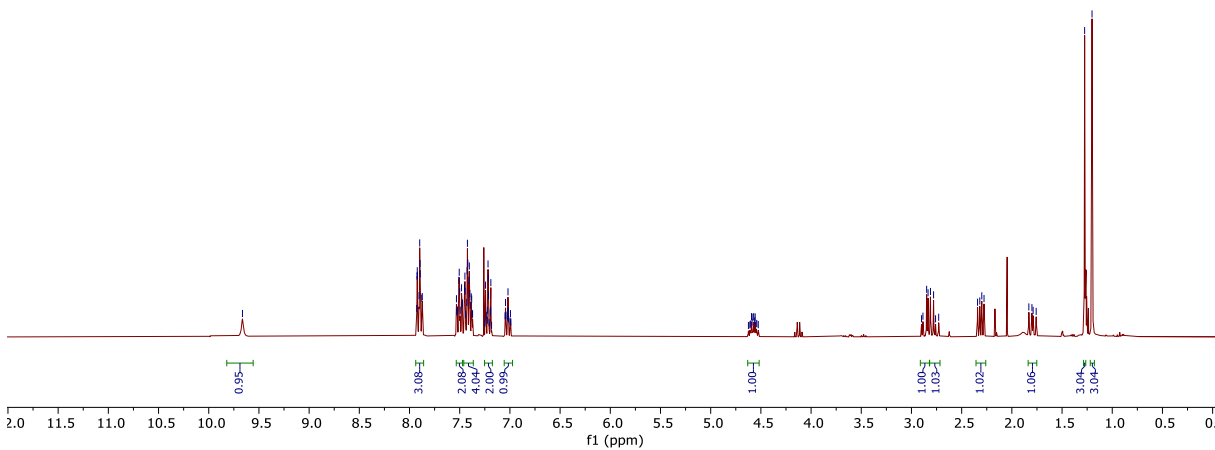

200612.f331.11.fid — Zhang/ Y Zhang-3-232 — C13CPD CDCl3 {C:\Bruker\TopSpin3.6.0} 2006 31 — 75.49MHz

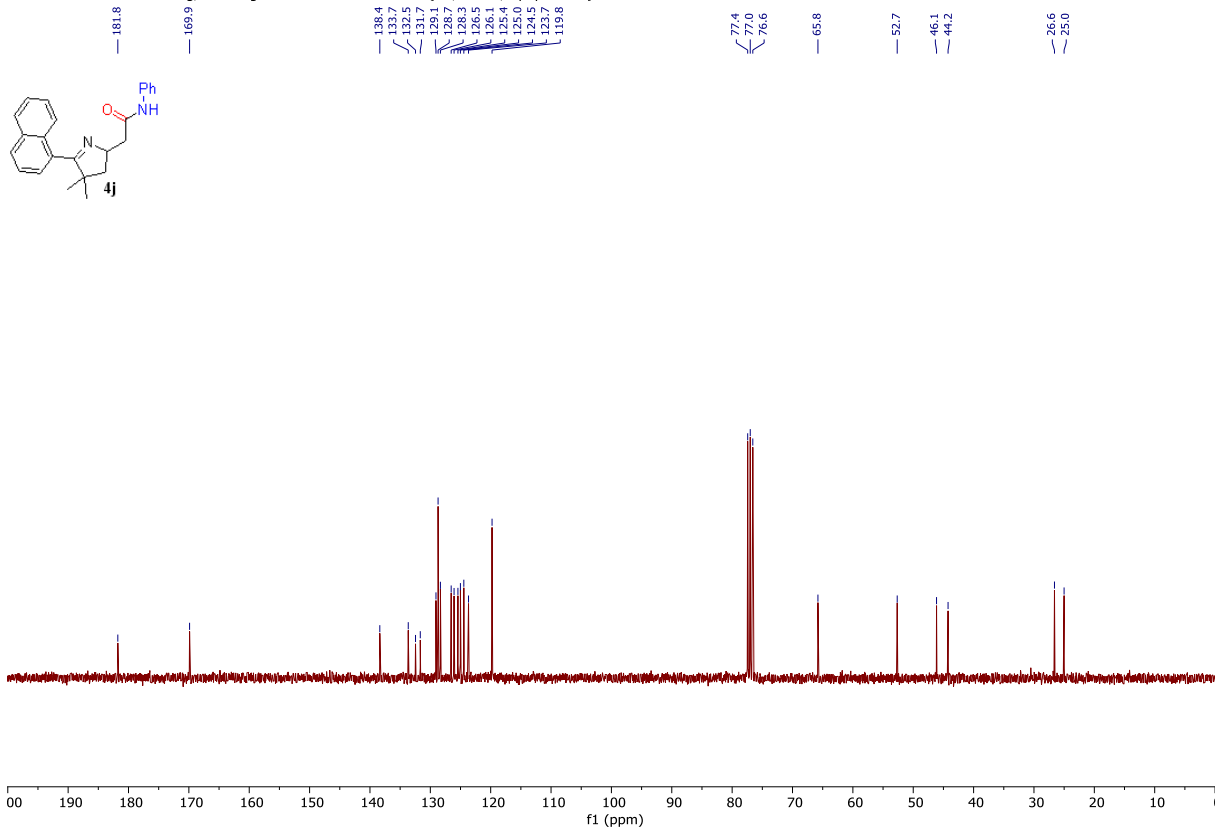

200527.341.10.fid — Youcan Zhang YZhang-3-221 — Au1H CDCl3 {C:\Bruker\TopSpin3.6.0} 2005 41 — 300.13MHz

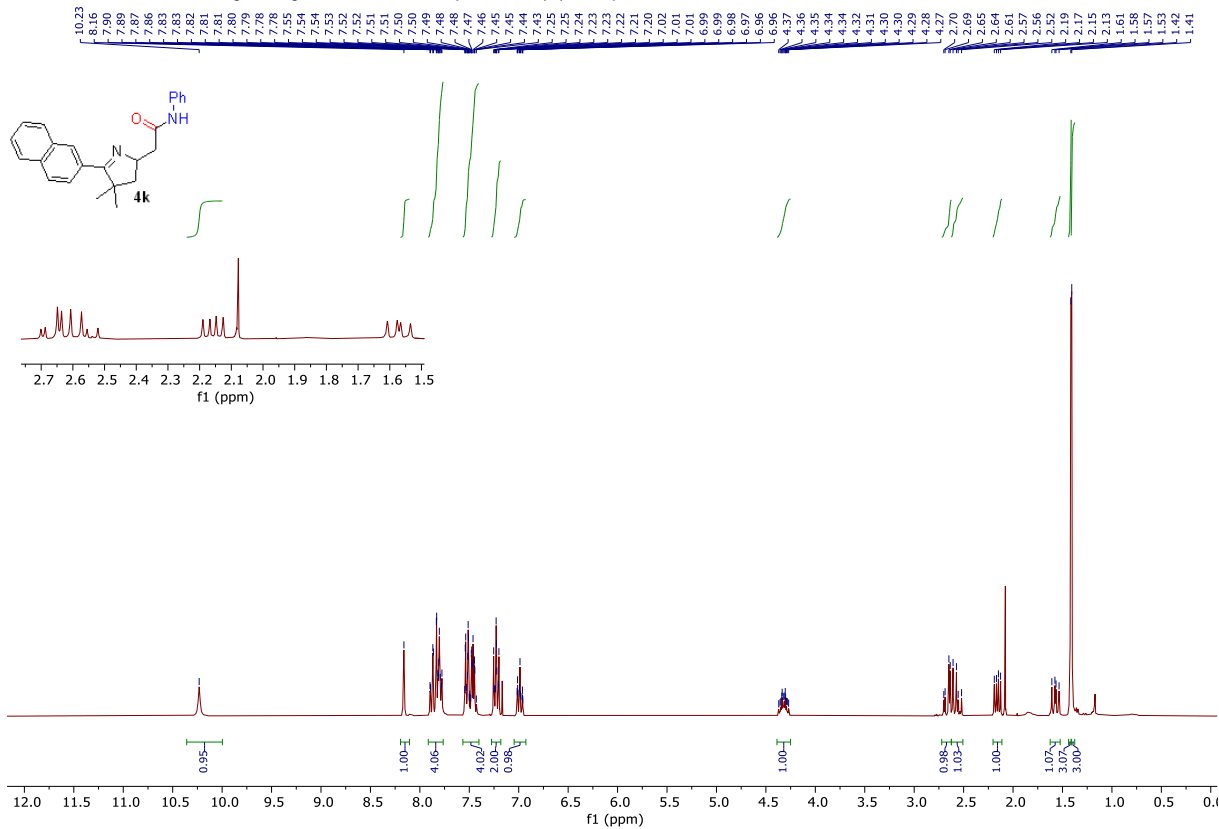

200527.341.11.fid — Youcan Zhang YZhang-3-221 — Au13C CDCl3 {C:\Bruker\TopSpin3.6.0} 2005 41 — 75.48MHz

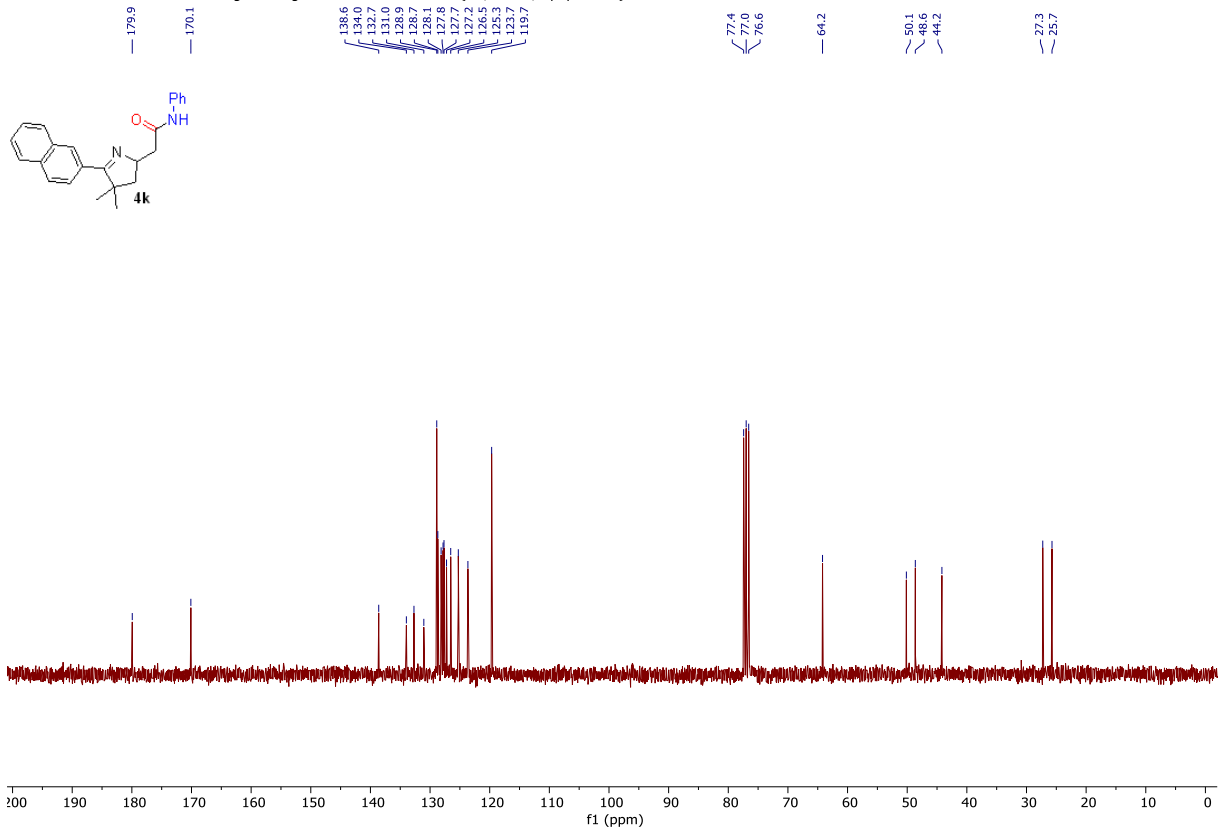

200612.f330.10.fid — Zhang/ Y Zhang-3-229 — PROTON CDCl3 {C:\Bruker\TopSpin3.6.0} 2006 30 — 300.20MHz

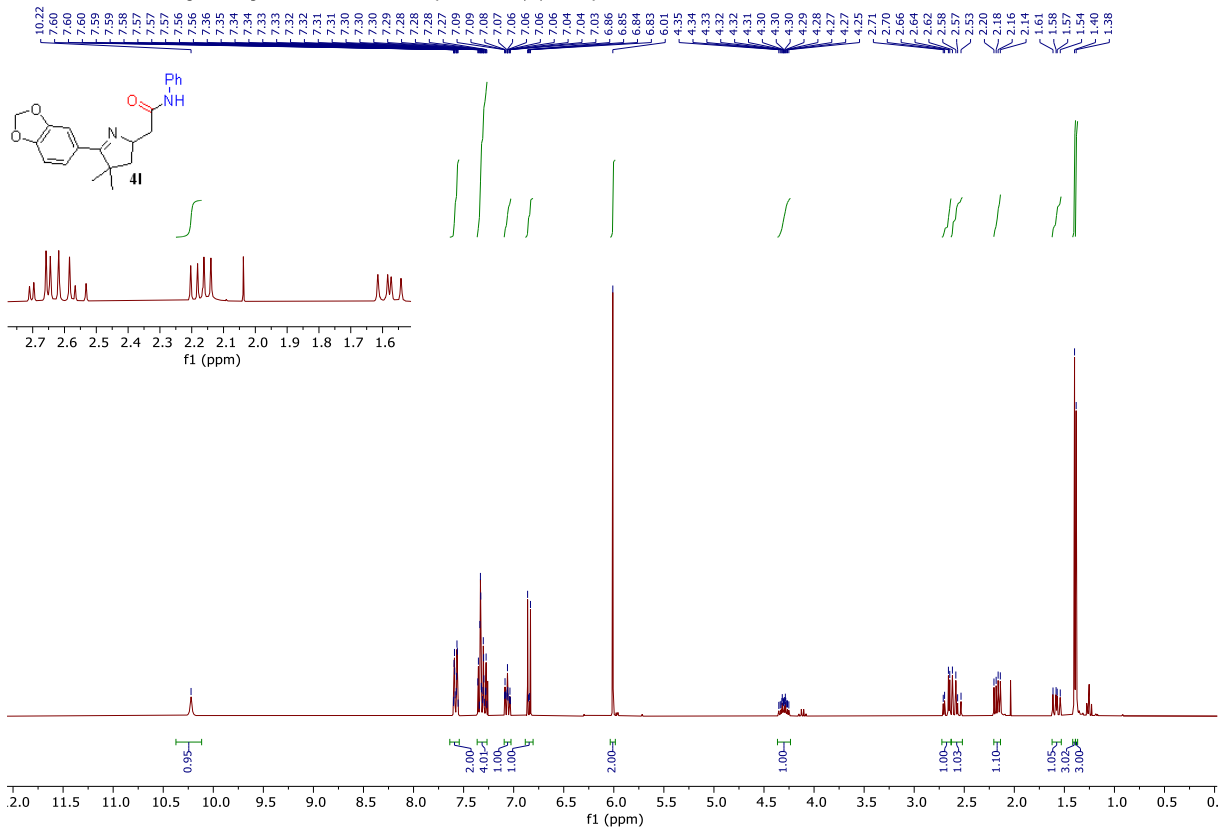

200612.f330.11.fid — Zhang/ Y Zhang-3-229 — C13CPD CDCl3 {C:\Bruker\TopSpin3.6.0} 2006 30 — 75.49MHz

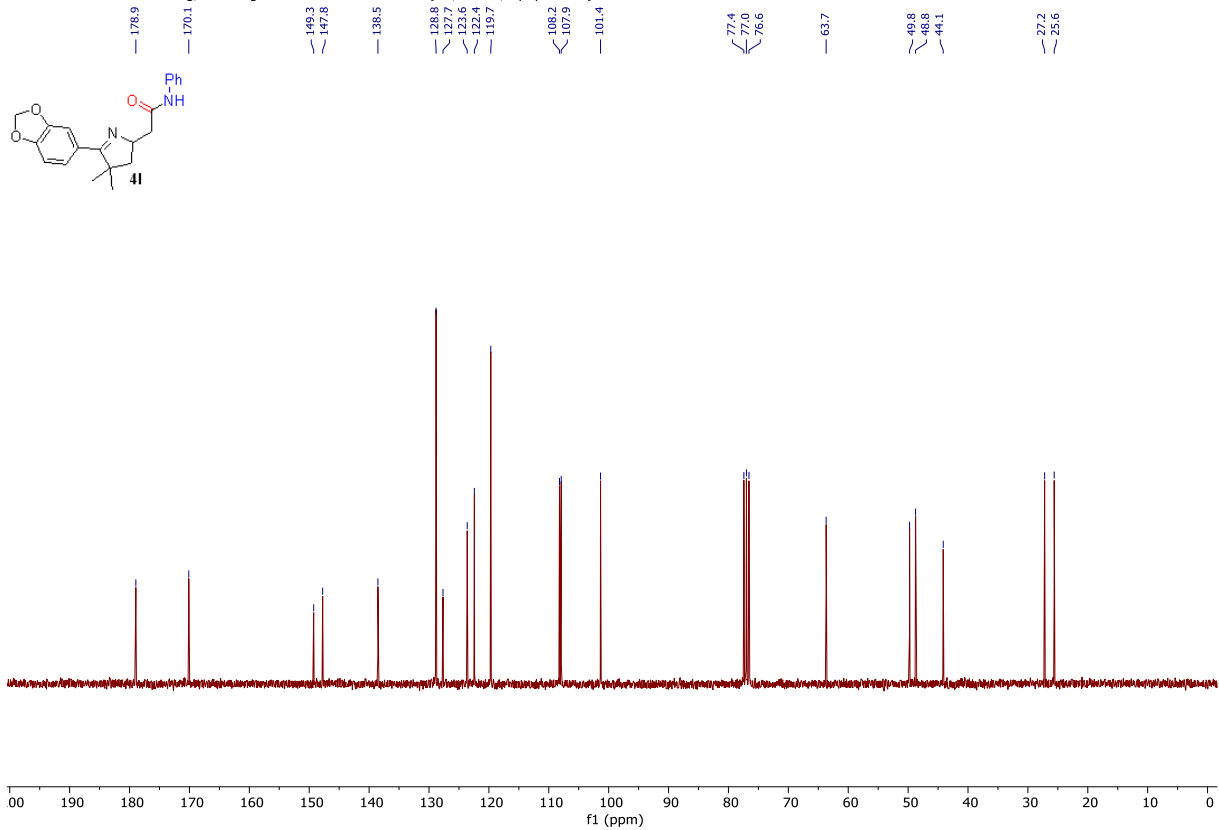

200622.f341.10.fid — Youcan Zhang YZhang-3-238 — PROTON CDCl3 {C:\Bruker\TopSpin3.6.0} 2006 41 — 300.20MHz

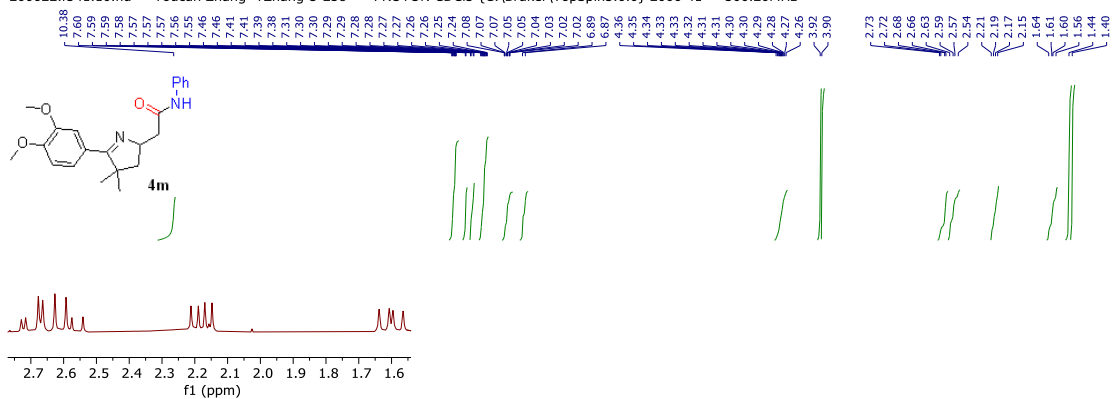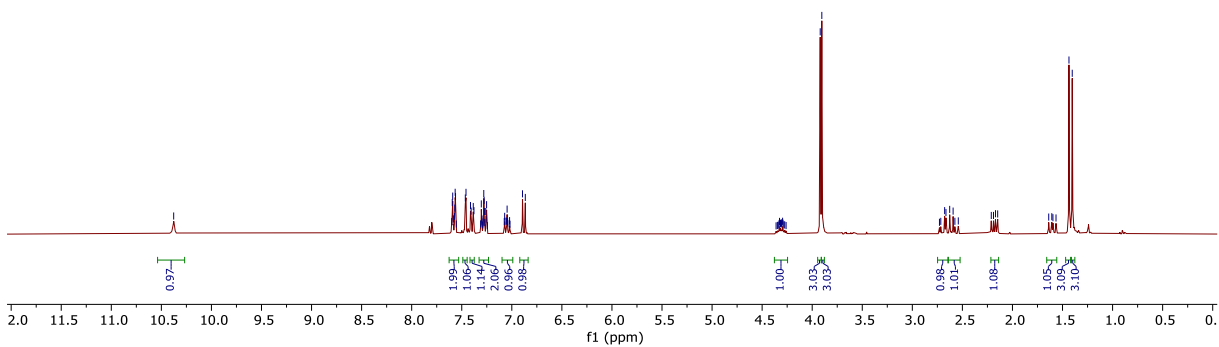

200622.f341.11.fid — Youcan Zhang YZhang-3-238 — C13CPD CDCl3 {C:\Bruker\TopSpin3.6.0} 2006 41 — 75.49MHz

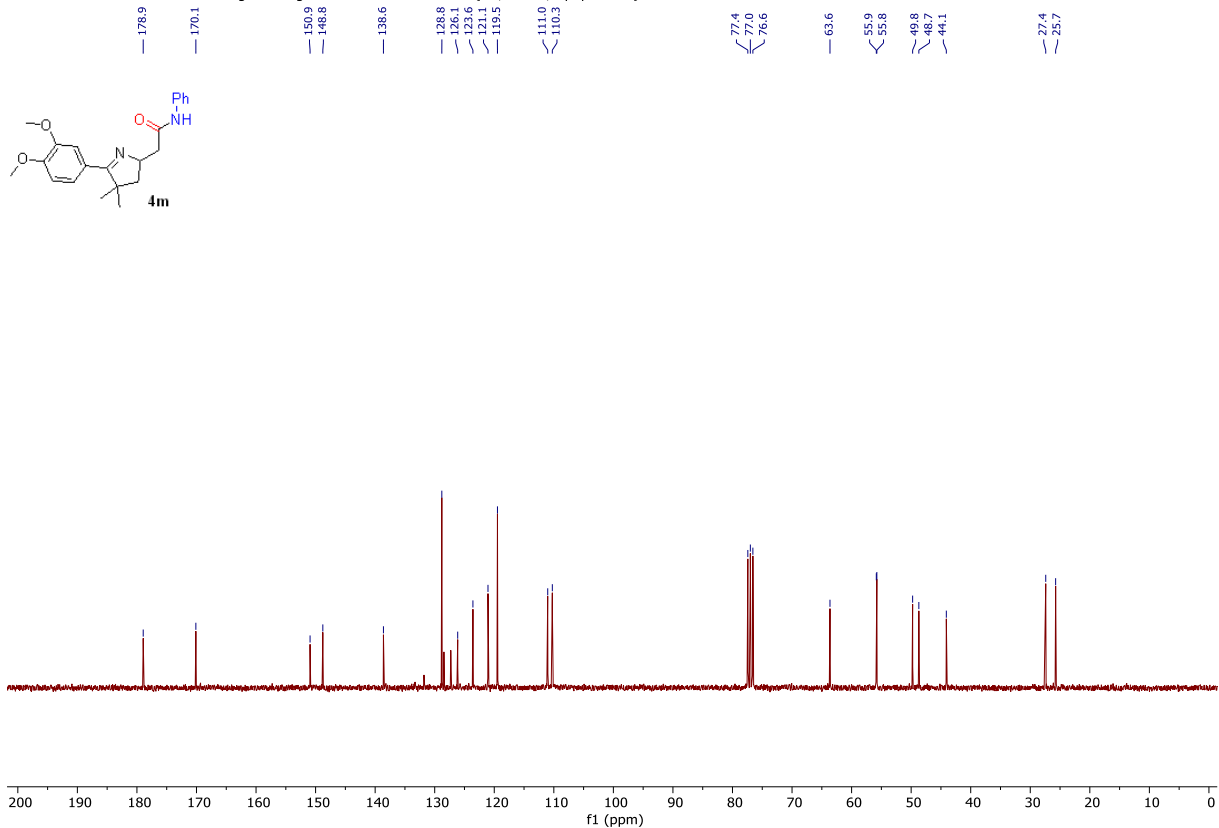



200619.f324.10.fid — Youcan Zhang YZhang-3-239 — PROTON CDCl3 {C:\Bruker\TopSpin3.6.0} 2006 24 — 300.20MHz

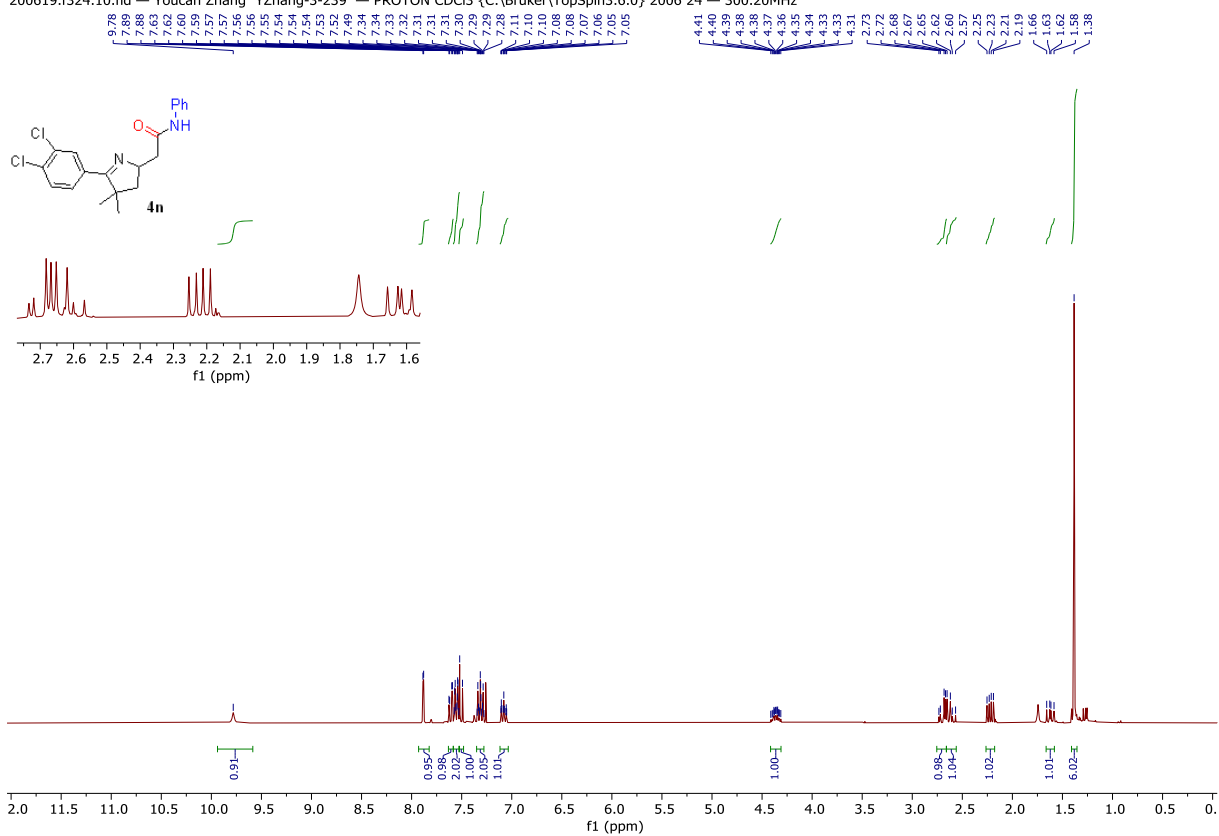

200619.f324.11.fid — Youcan Zhang YZhang-3-239 — C13CPD CDCl3 {C:\Bruker\TopSpin3.6.0} 2006 24 — 75.49MHz

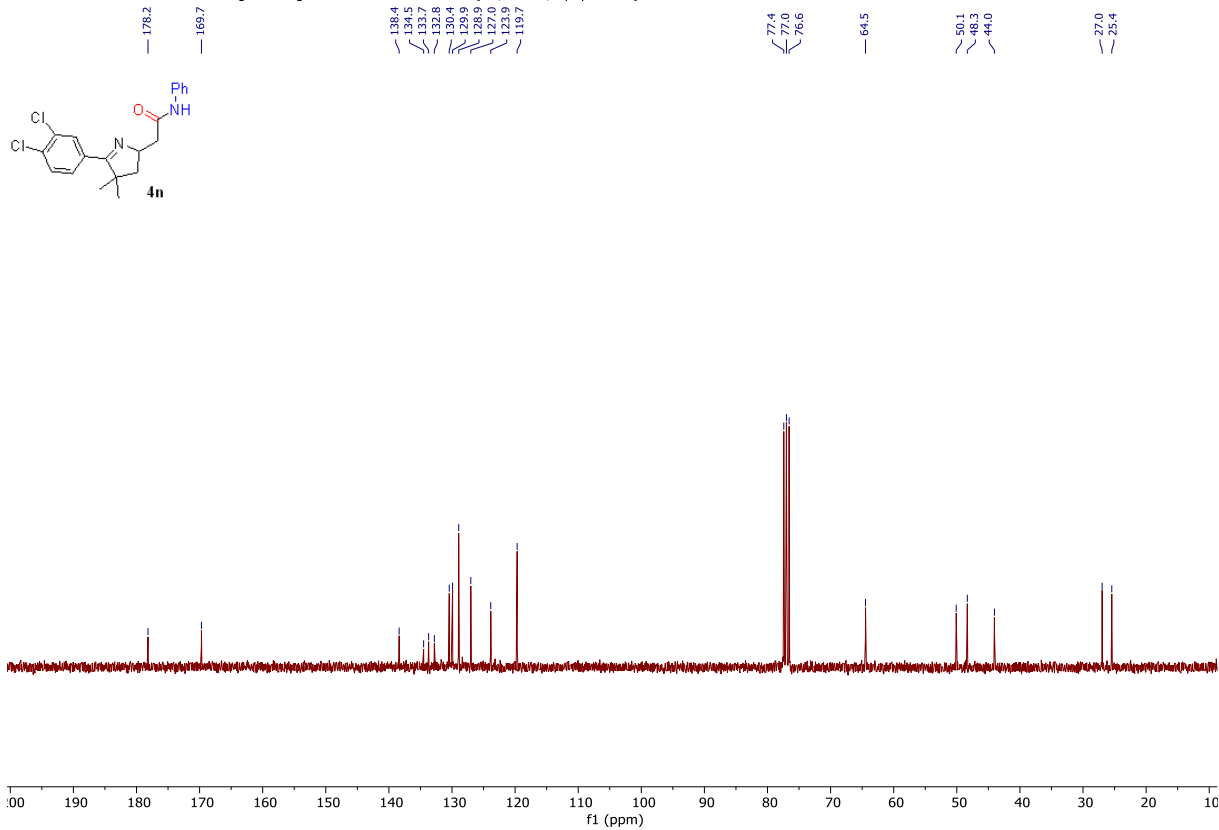

200622.f343.10.fid — Youcan Zhang YZhang-3-241 — PROTON CDCl3 {C:\Bruker\TopSpin3.6.0} 2006 43 — 300.20MHz

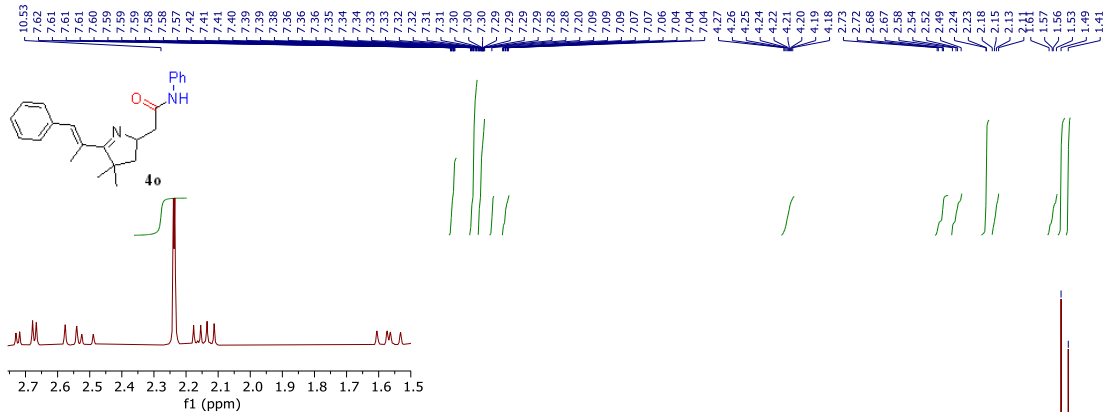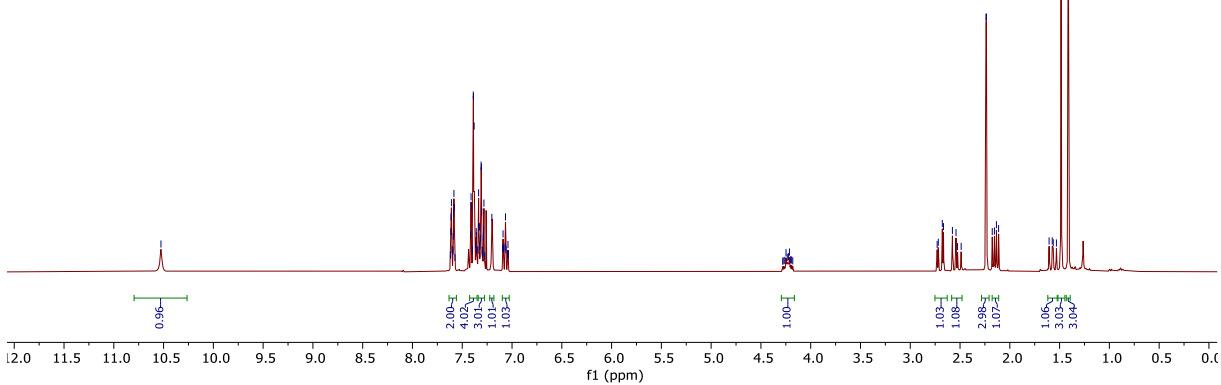

200622.f343.11.fid — Youcan Zhang YZhang-3-241 — C13CPD CDCl3 {C:\Bruker\TopSpin3.6.0} 2006 43 — 75.49MHz

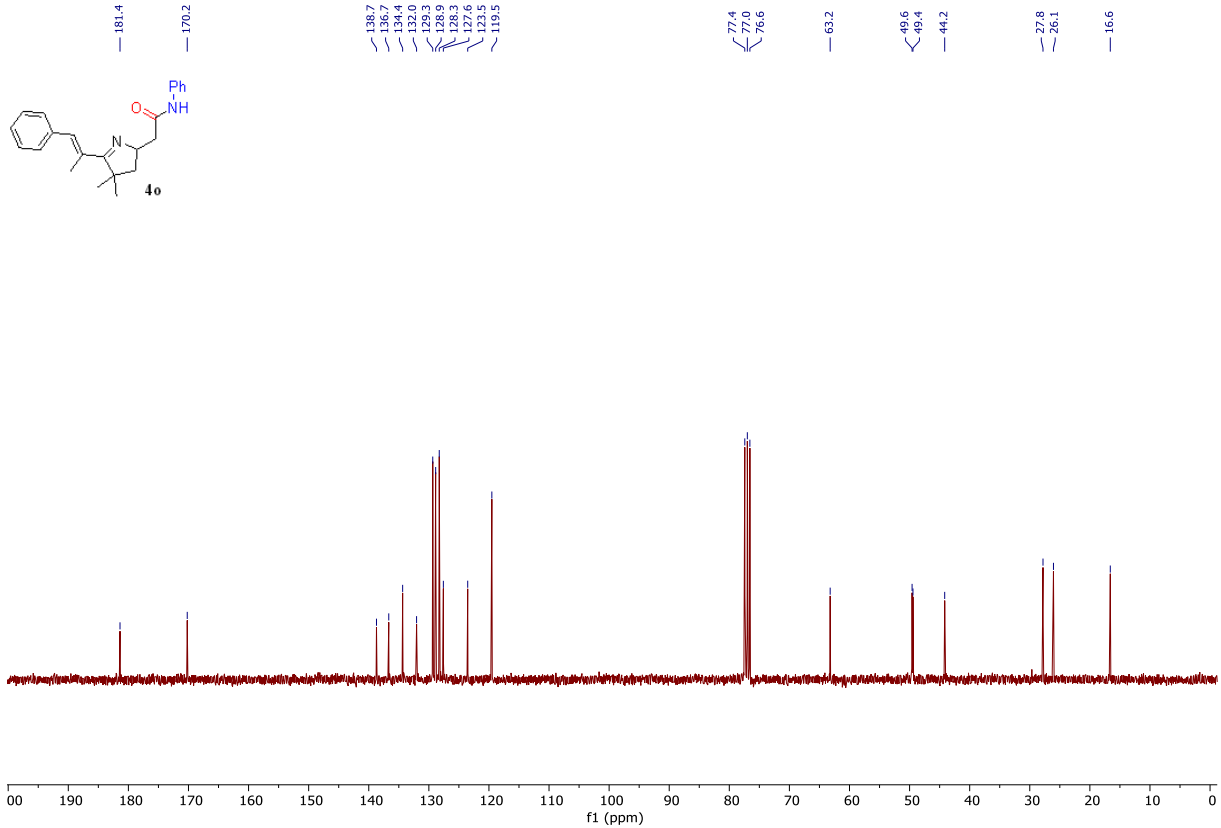

200527.f333.10.fid — Youcanzhang YZhang-3-205 — PROTON CDCl3 {C:\Bruker\TopSpin3.6.0} 2005 33 — 300.20MHz

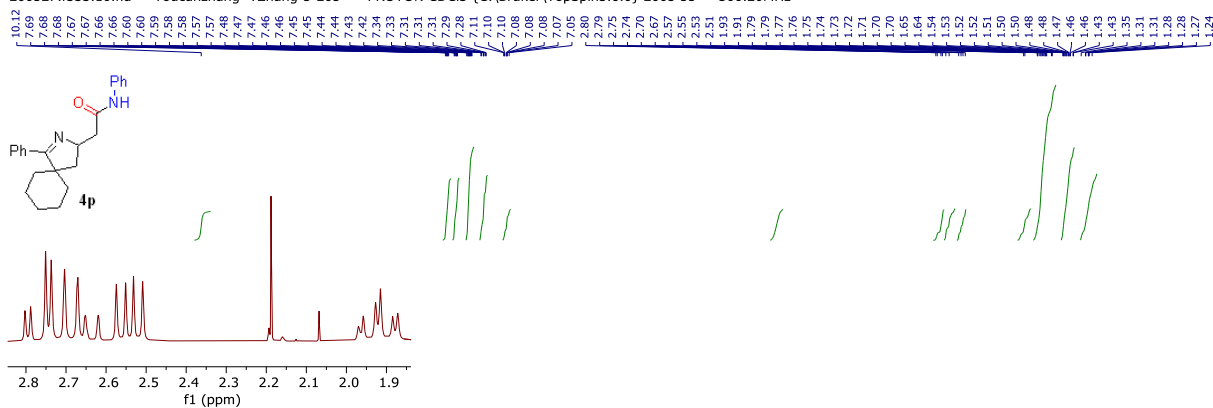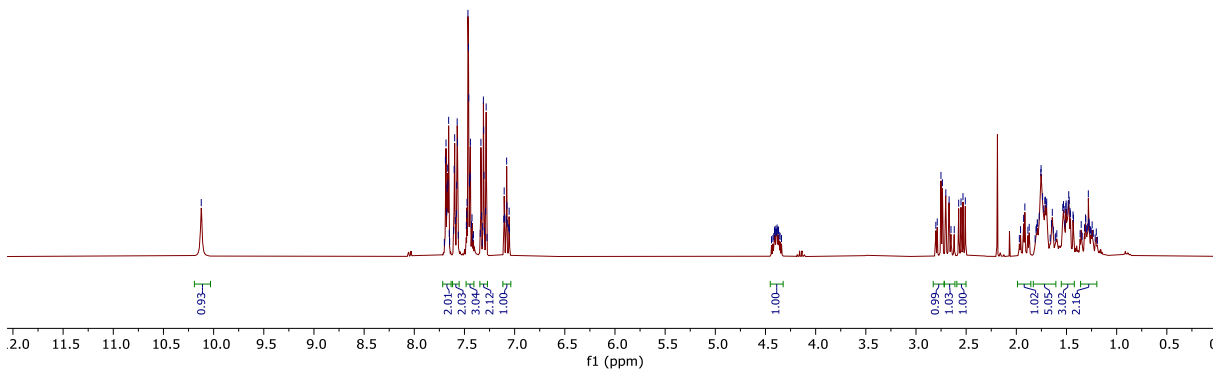

200527.f333.11.fid — Youcanzhang YZhang-3-205 — C13CPD CDCl3 {C:\Bruker\TopSpin3.6.0} 2005 33 — 75.49MHz

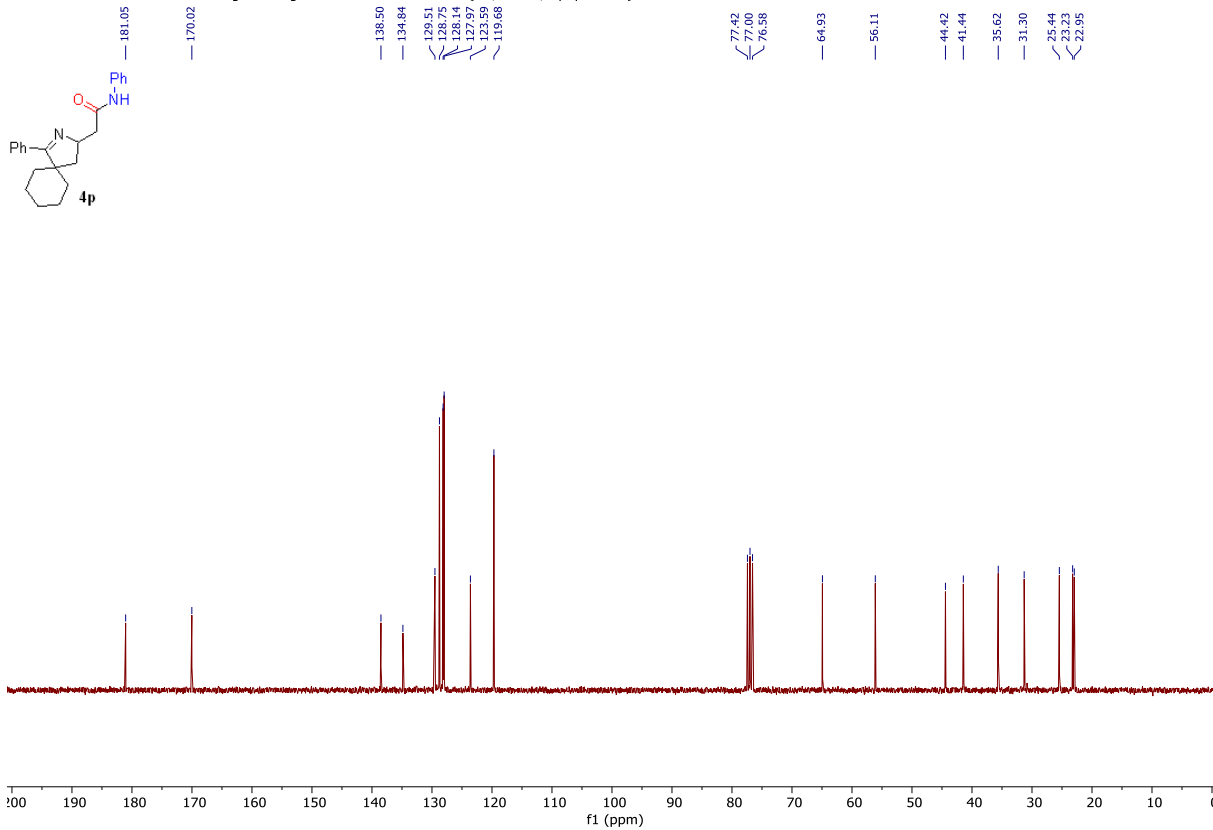

200504.404.10.fid — Youcan Zhang YZhang-3-141 — Au1H CDCl3 {C:\Bruker\TopSpin3.5pl6} 2005 4 — 400.13MHz

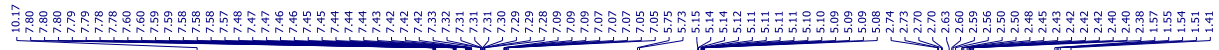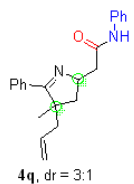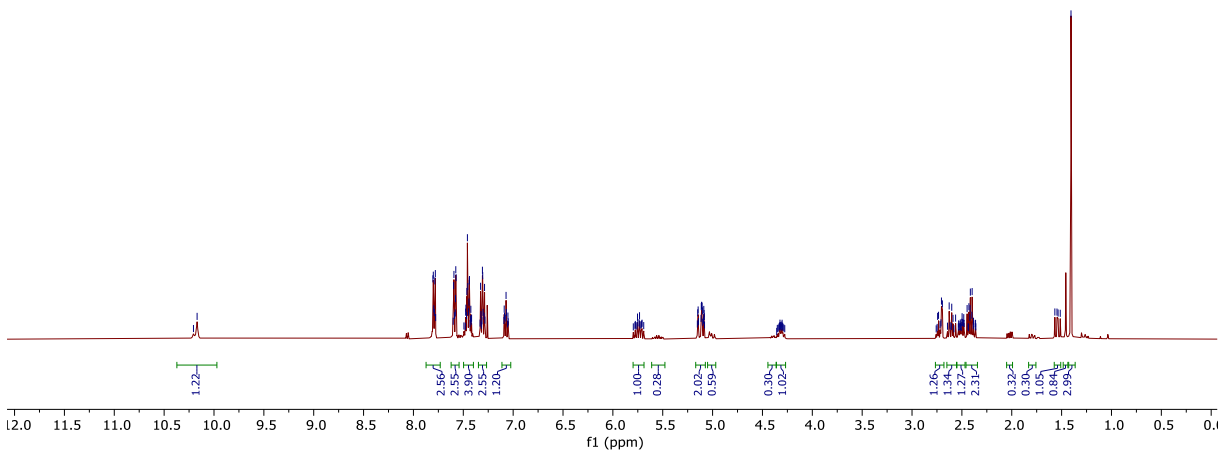

200504.404.11.fid — Youcan Zhang YZhang-3-141 — Au13C CDCl3 {C:\Bruker\TopSpin3.5pl6} 2005 4 — 100.63MHz

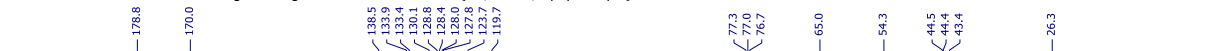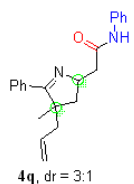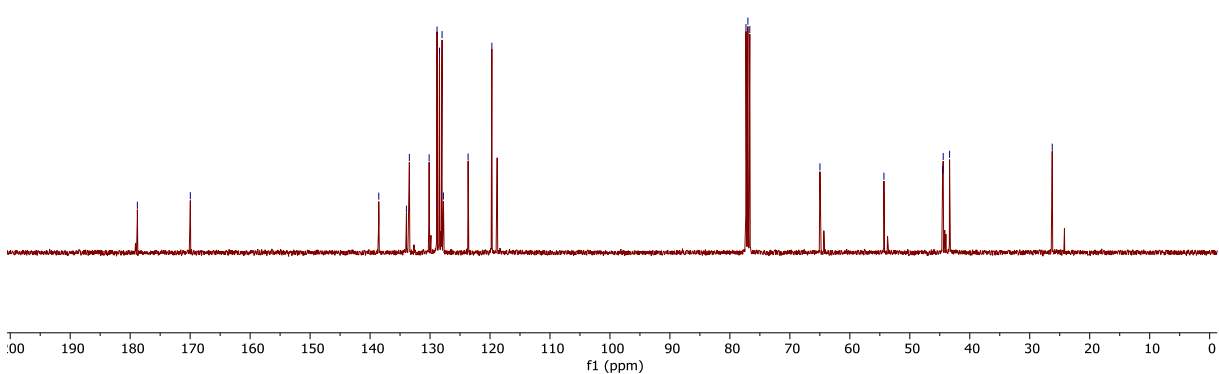



200624.407.10.fid — Youcan Zhang YZhang-3-246 — Au1H CDCl3 {C:\Bruker\TopSpin3.5pl6} 2006 7 — 400.13MHz

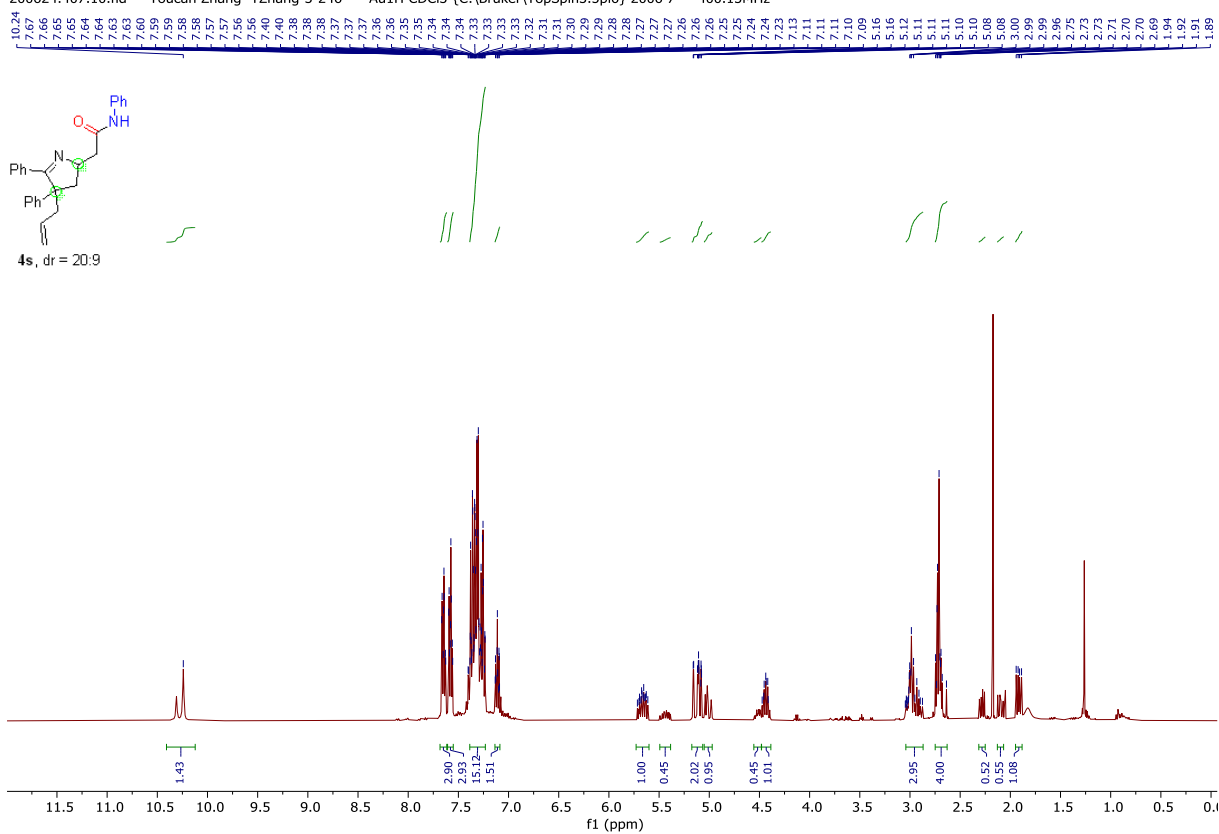

200624.407.11.fid — Youcan Zhang YZhang-3-246 — Au13C CDCl3 {C:\Bruker\TopSpin3.5pl6} 2006 7 — 100.63MHz

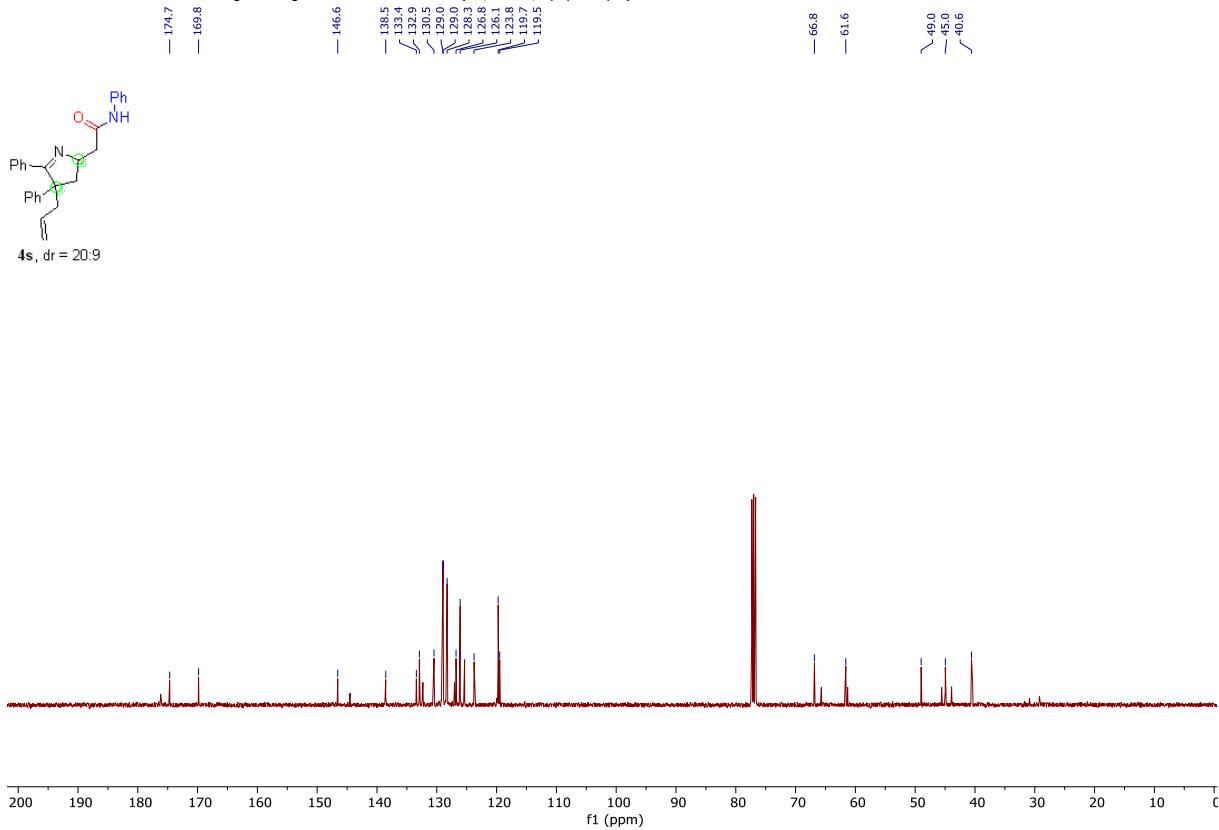

200522.f321.10.fid — Youcan Zhang, 3-204 — PROTON CDCl3 {C:\Bruker\TopSpin3.6.0} 2005 21 — 300.20MHz

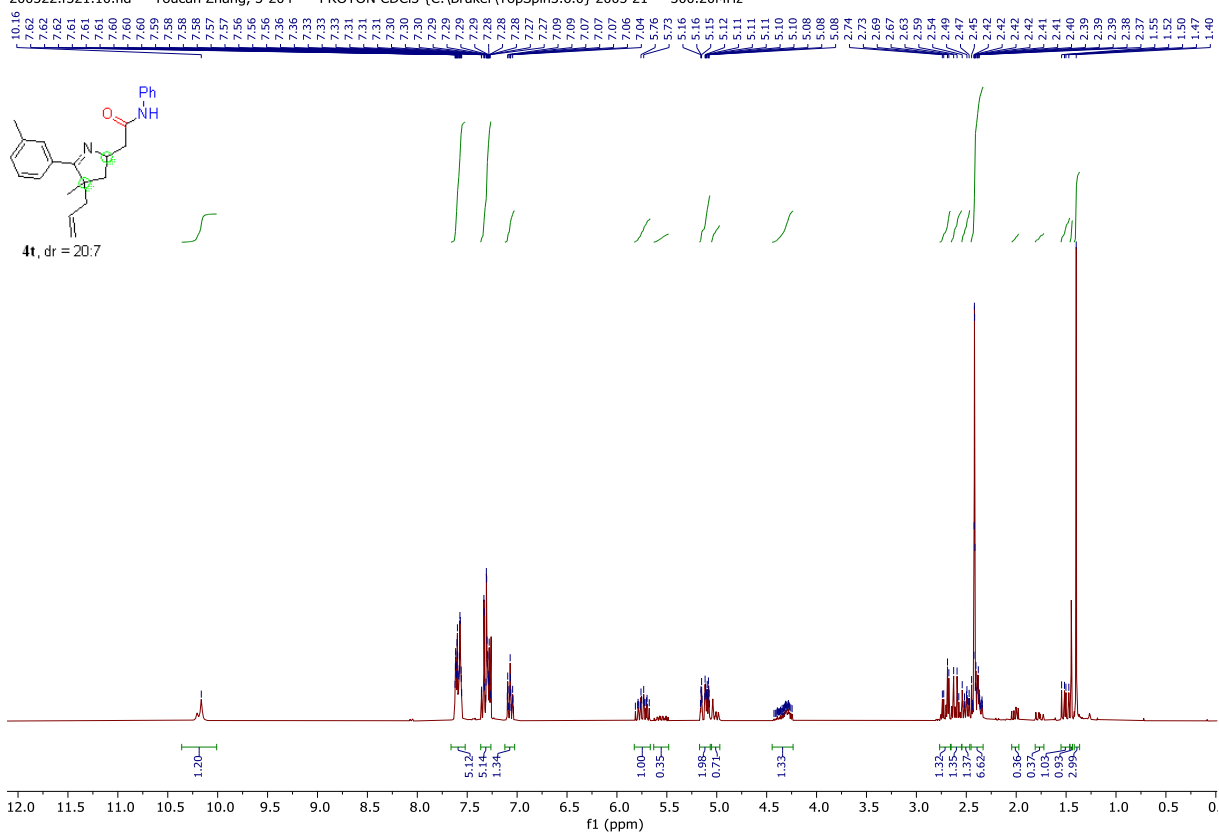

200522.f321.11.fid — Youcan Zhang, 3-204 — C13CPD CDCl3 {C:\Bruker\TopSpin3.6.0} 2005 21 — 75.49MHz

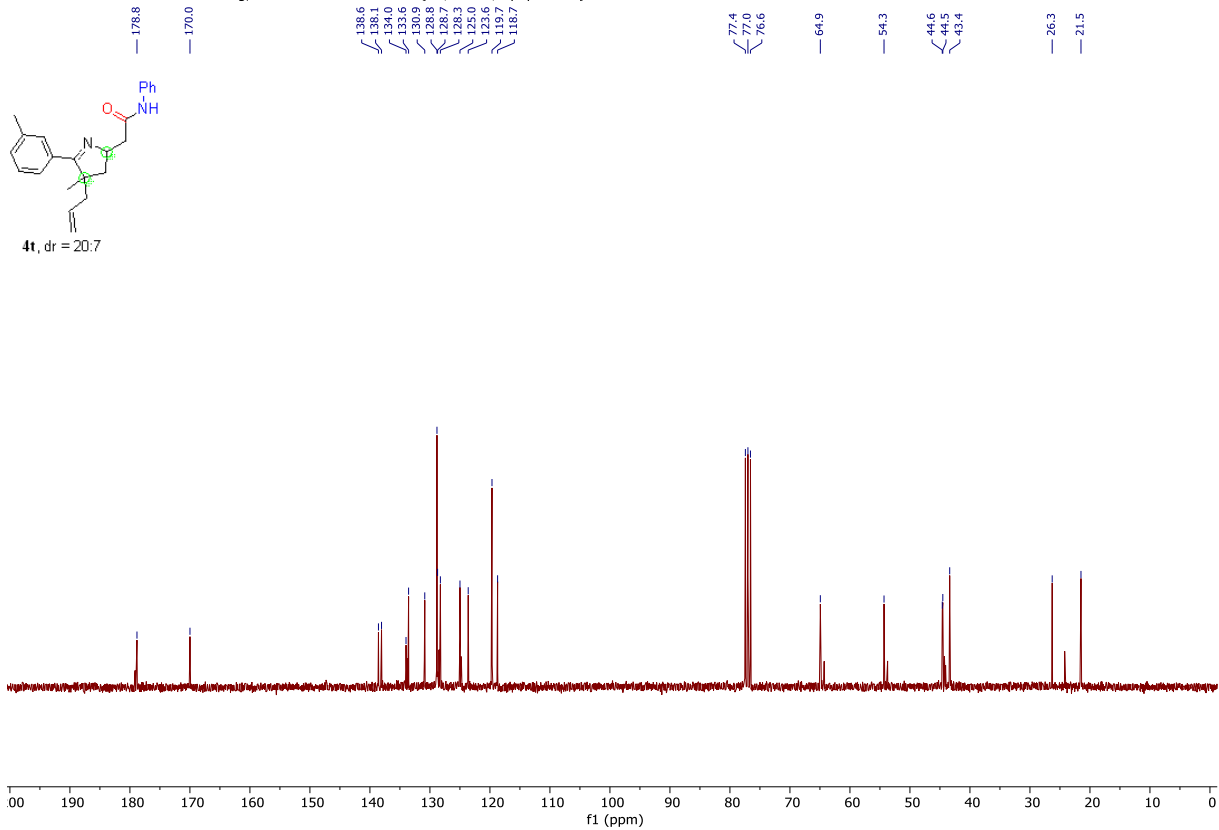

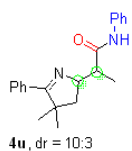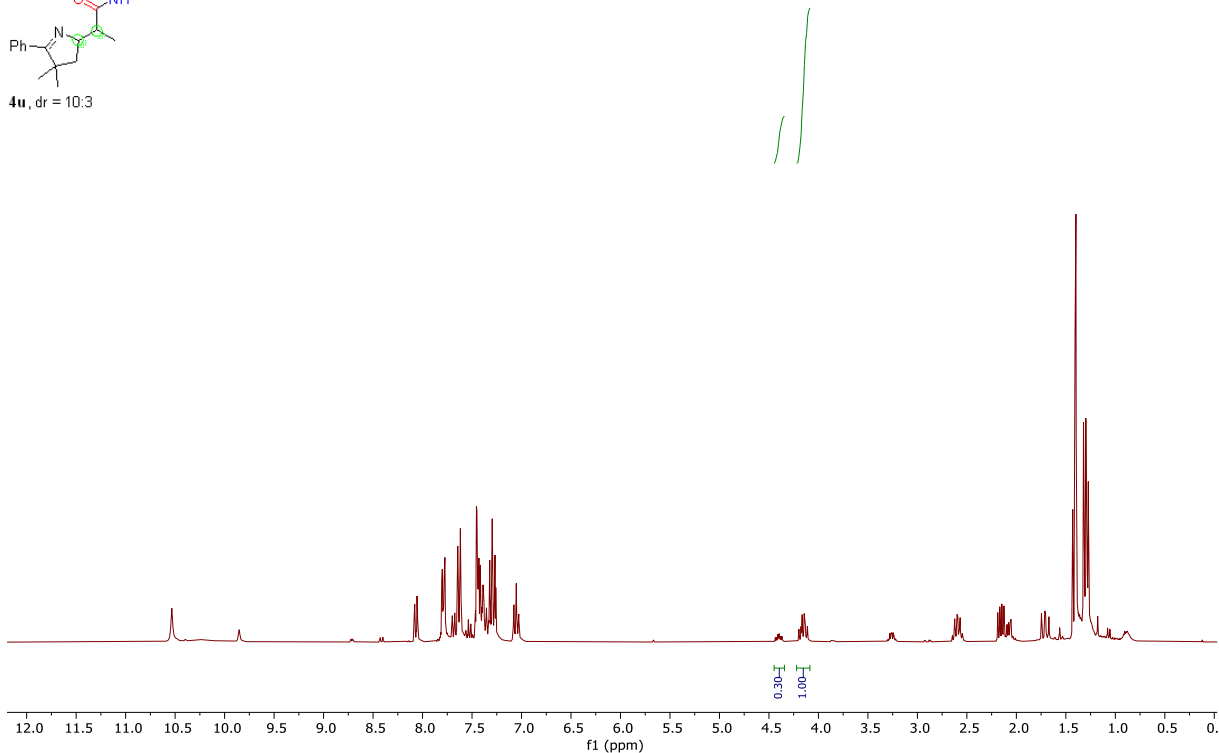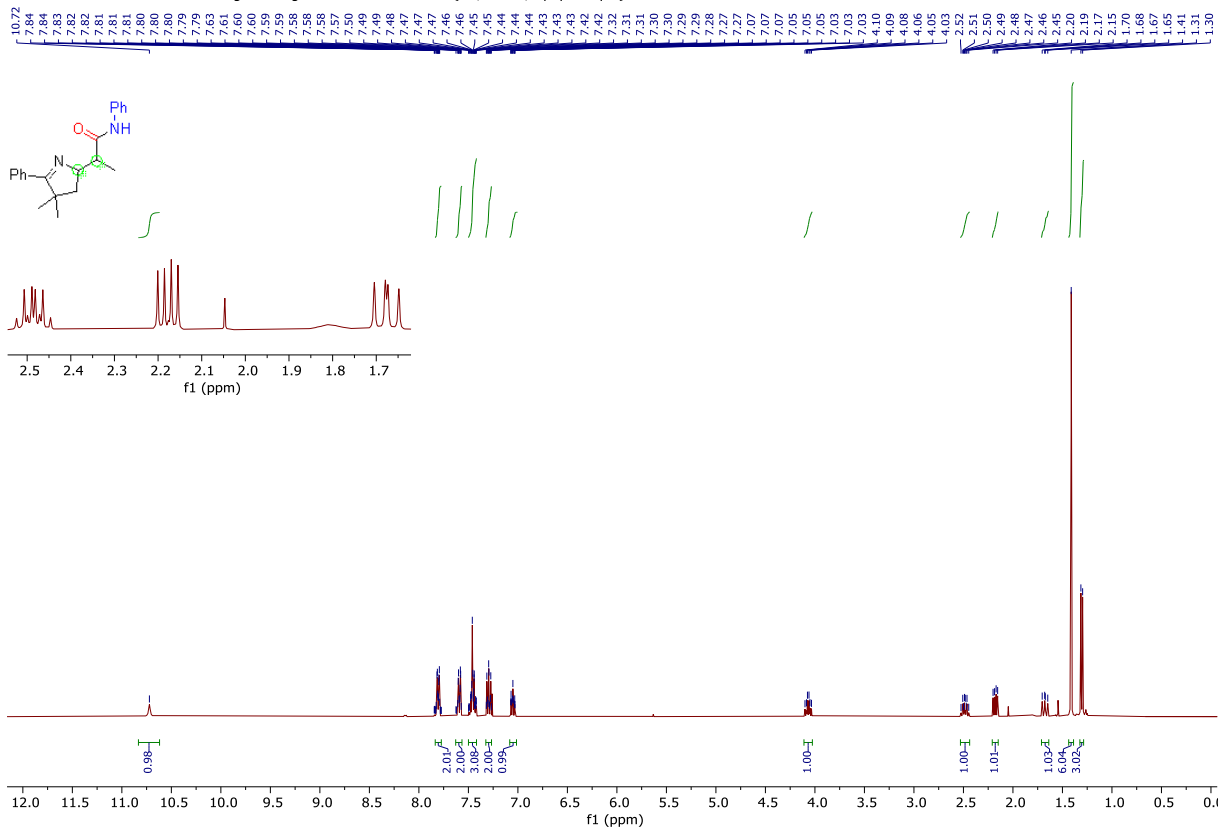



200603.406.11.fid — Youcan Zhang YZhang-3-224 — Au13C CDCl3 {C:\Bruker\TopSpin3.5pl6} 2006 6 — 100.63MHz

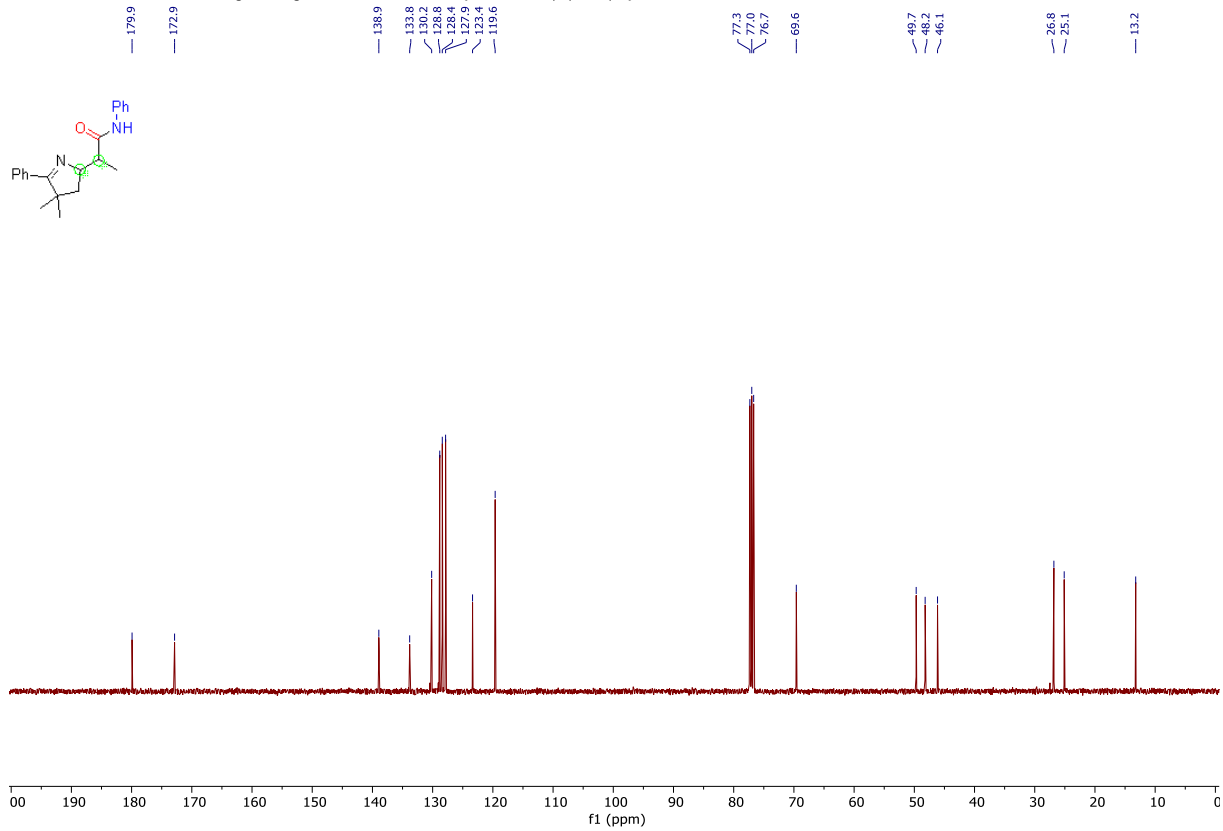

200617.310.10.fid — Youcan Zhang YZhang-3-235-2 — Au1H CDCl3 {C:\Bruker\TopSpin3.6.0} 2006 10 — 300.13MHz

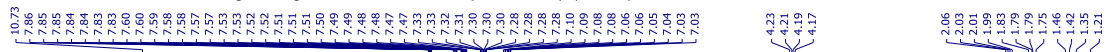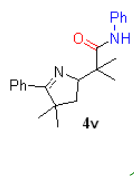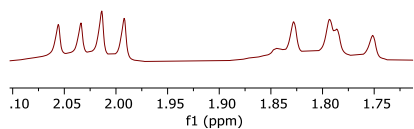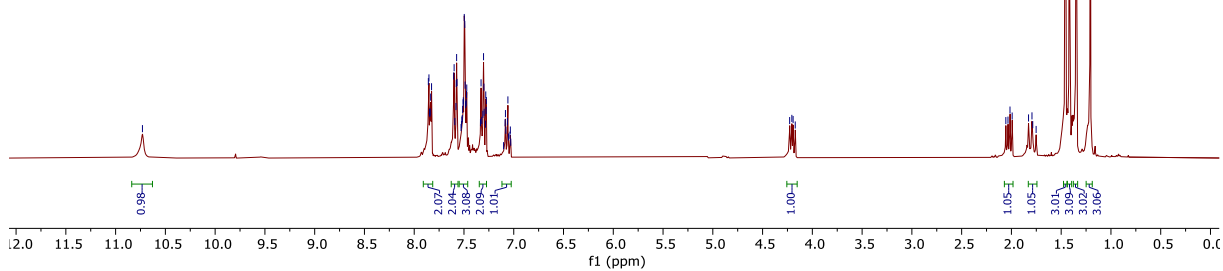

200617.310.11.fid — Youcan Zhang YZhang-3-235-2 — Au13C CDCl3 {C:\Bruker\TopSpin3.6.0} 2006 10 — 75.48MHz

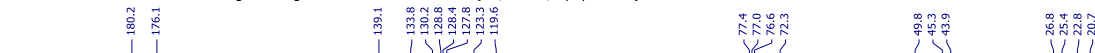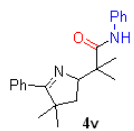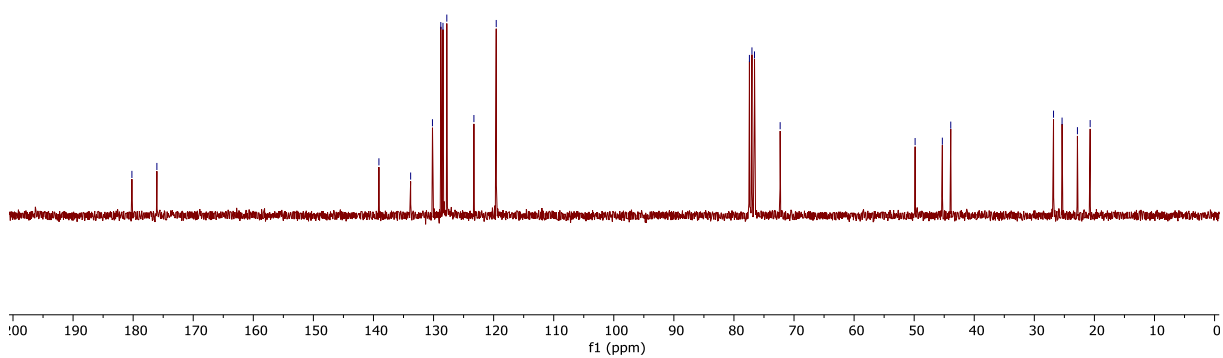

200617.309.10.fid — Youcan Zhang YZhang-3-235-1 — Au1H CDCl3 {C:\Bruker\TopSpin3.6.0} 2006 9 — 300.13MHz

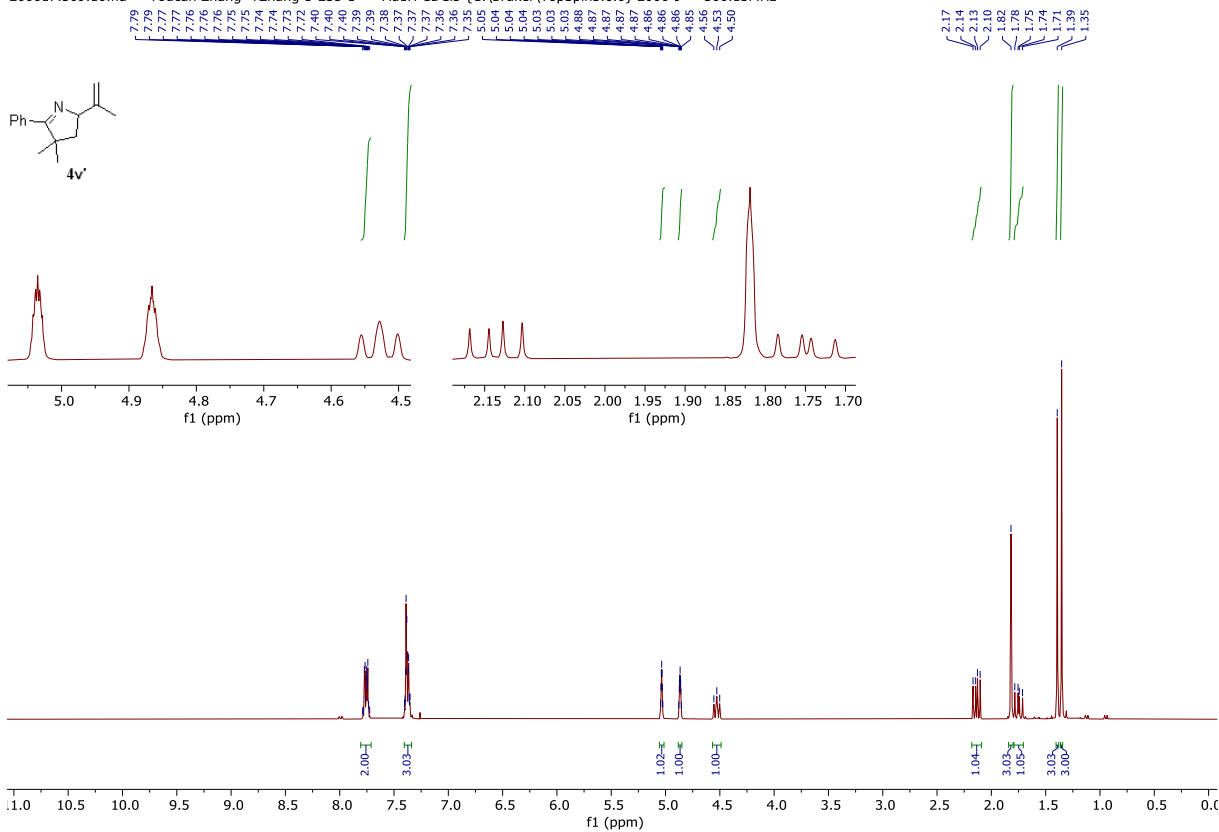

200617.309.11.fid — Youcan Zhang YZhang-3-235-1 — Au13C CDCl3 {C:\Bruker\TopSpin3.6.0} 2006 9 — 75.48MHz

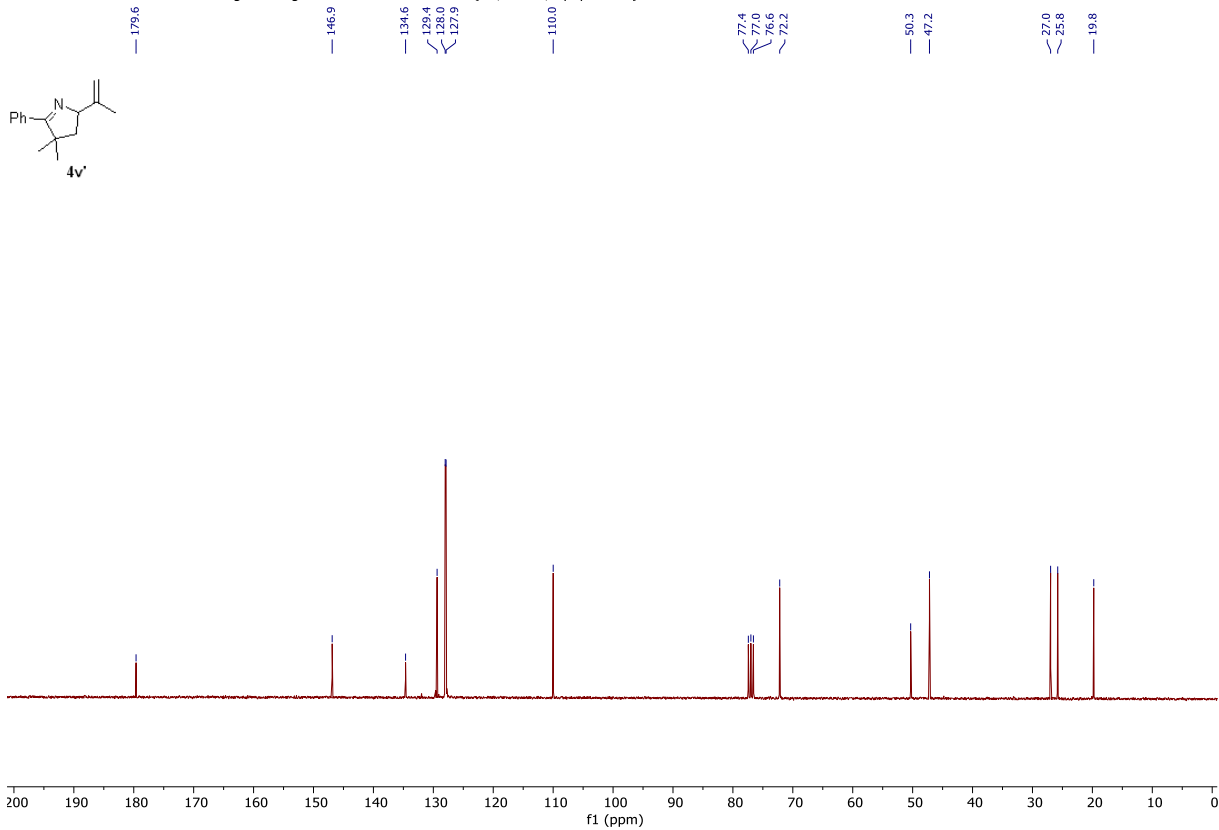

Supplement: d0qo00999g1.pdf [file d0qo00999g1.pdf]
